# 1 A THERMODYNAMIC MODEL OF MESOSCALE NEURAL FIELD DYNAMICS: DERIVATION 2 AND LINEAR ANALYSIS

3 Short running title: Thermodynamics of mesoscopic activity

4 Authors: Y. Qin<sup>1</sup>, A.P. Maurer<sup>1,2,3</sup>, and A. Sheremet<sup>1,2</sup>

5 Affiliations:

6 1. Engineering School of Sustainable Infrastructure and Environment, University  
7 of Florida, Gainesville, FL. 32611.

8 2. McKnight Brain Institute, Department of Neuroscience, University of Florida,  
9 Gainesville, FL. 32610.

10 3. Department of Biomedical Engineering, University of Florida, Gainesville, FL.  
11 32611.

12 Correspondence: Alex Sheremet, email: alex.sheremet@essie.ufl.edu

13 Competing interests: The authors declare that they have no competing interests.

14 Acknowledgments: This work was supported by the McKnight Brain Research Foundation,  
15 and NIH grants. Grant Sponsor: National Institute on Aging; Grant number: AG055544  
16 and Grant Sponsor: National Institute of Mental Health; Grant Number: MH109548.

## 17 ABSTRACT

18 Motivated by previous research suggesting that mesoscopic collective activity has the defin-  
19 ing characteristics of a turbulent system, we postulate a thermodynamic model based on the  
20 fundamental assumption that the activity of a neuron is characterized by two distinct stages:  
21 a sub-threshold stage, described by the value of mean membrane potential, and a transitional  
22 stage, corresponding to the firing event. We therefore distinguish between two types of en-  
23 ergy: the potential energy released during a spike, and the internal kinetic energy that trig-  
24 gers a spike. Formalizing these assumptions produces a system of integro-differential equa-  
25 tions that generalizes existing models [Wilson and Cowan, 1973, Amari, 1977], with the ad-  
26 vantage of providing explicit equations for the evolution of state variables. The linear analysis  
27 of the system shows that it supports single- or triple-point equilibria, with the refractoriness  
28 property playing a crucial role in the generation of oscillatory behavior. In single-type (excita-  
29 tory) systems this derives from the natural refractory state of a neuron, producing “refractory  
30 oscillations” with periods on the order of the neuron refractory period. In dual-type systems,  
31 the inhibitory component can provide this functionality even if neuron refractory period is ig-  
32 nored, supporting mesoscopic-scale oscillations at much lower activity levels. Assuming that  
33 the model has any relevance for the interpretation of LFP measurements, it provides insight  
34 into mesoscale dynamics. As an external forcing, theta may play a major role in modulating key  
35 parameters of the system: internal energy and excitability (refractoriness) levels, and thus  
36 in maintaining equilibrium states, and providing the increased activity necessary to sustain  
37 mesoscopic collective action. Linear analysis suggest that gamma oscillations are associated  
38 with the theta trough because it corresponds to higher levels of forced activity that decreases  
39 the stability of the equilibrium state, facilitating mesoscopic oscillations.

|    | CONTENTS                                                                                   |    |
|----|--------------------------------------------------------------------------------------------|----|
| 40 |                                                                                            |    |
| 41 | Abstract                                                                                   | 1  |
| 42 | 1. Introduction                                                                            | 3  |
| 43 | 2. Motivation                                                                              | 5  |
| 44 | 3. Short review of neural population models                                                | 6  |
| 45 | 4. A thermodynamic mesoscopic model for neural fields: the powder-keg paradigm             | 10 |
| 46 | 4.1. Microscopic vs macroscopic <sup>1</sup>                                               | 10 |
| 47 | 4.2. Dynamical, kinetic, and thermodynamic/hydrodynamic descriptions                       | 11 |
| 48 | 4.3. The powder-keg paradigm                                                               | 15 |
| 49 | 4.4. Governing equations                                                                   | 16 |
| 50 | 5. The relationship between the powder-keg model 6a-6d and the WC/A class of               |    |
| 51 | models                                                                                     | 20 |
| 52 | 6. Simplifications                                                                         | 22 |
| 53 | 7. Linear analysis: single-type (excitatory) neural fields                                 | 24 |
| 54 | 7.1. Equilibrium states                                                                    | 25 |
| 55 | 7.2. Perturbations of equilibrium                                                          | 27 |
| 56 | 7.3. Inhomogeneous perturbations (collective action)                                       | 29 |
| 57 | 8. Linear analysis: dual-type (excitatory-inhibitory) neural fields                        | 33 |
| 58 | 8.1. Equilibrium states                                                                    | 34 |
| 59 | 8.2. Perturbations of equilibrium                                                          | 34 |
| 60 | 8.3. Inhomogeneous perturbations (collective action)                                       | 37 |
| 61 | 9. Discussion                                                                              | 39 |
| 62 | Appendix A. The activation function and the positive-definite character of the $u$ and $a$ | 43 |
| 63 | A.1. Simplification of the activation function                                             | 44 |
| 64 | A.2. The bounds of state variables $a$ and $u$                                             | 45 |
| 65 | Appendix B. Growth rate and phase lag for dual-type neural fields at equilibrium           | 46 |
| 66 | Appendix C. Dispersion relation for dual-type neural fields                                | 46 |
| 67 | References                                                                                 | 48 |

---

<sup>1</sup>The ideas below are elementary. We discuss them here only because they reflect a certain choice of terms, and for benefit of readers less familiar with statistical physics.

68

## 1. INTRODUCTION

69 A persistent challenge in understanding the neurobiological basis of higher-cognition is un-  
70 covering the mechanism by which neural activity across different scales of the brain is coordi-  
71 nated [Allen and Collins, 2013, Lashley, 1958]. At cell scale, action potentials ( $\sim 10^3$  Hz) pro-  
72 vide the “atomic” constituents of activity [Buzsáki, 2006, Buzsáki and Draguhn, 2004, Eichen-  
73 baum, 2017, Hasselmo, 2015, McNaughton et al., 1996]. At global-brain scale, the large-amplitude  
74 theta rhythm, with a frequency three orders of magnitude lower (6-9 Hz), is believed to pro-  
75 vide a temporal structure around which smaller scale oscillations organize [Buzsáki, 2002,  
76 Green and Arduini, 1954, Green and Machne, 1955, Lisman and Idiart, 1995, Vanderwolf,  
77 1969]. However, neither spikes nor theta in isolation can represent cognition, which suggests  
78 that neural dynamics fundamental for higher cognition reside in collective activity occupying  
79 a scale intermediate (meso-) between theta and action potentials. Following previous work  
80 [e.g., Freeman, 2000b, Muller et al., 2018b] we define here the mesoscale as spanning tempo-  
81 ral scales between, say, 8 ms and 20 ms (e.g., LFP oscillations between 50 Hz and 120 Hz), and  
82 spatial scales in the order of mm to cm). These intervals correspond to the gamma activity  
83 [Bragin et al., 1995], prominent in the hippocampus.

84 At mesoscopic scales, the spatial organization of neurons within a neocortex layer shows a  
85 relative homogeneity. The mesoscopic neural activity supported by these layers involves a  
86 large number (e.g.,  $\sim 10^4 - 10^8$ , e.g., Deco et al., 2008) of synchronized action potentials that  
87 assemble into spatio-temporal patterns [Hebb, 1949, Lashley et al., 1951]. Should neurons  
88 be organized in a manner that favors local connectivity over long-distance projections, the  
89 spatio-temporal pattern of activity may manifest as propagating waves [Lubenov and Siapas,  
90 2009, Patel et al., 2012, 2013, Petsche and Stumpf, 1960, Muller et al., 2018b]. Recent stud-  
91 ies correlating hippocampal LFP to active exploration shows that neural activity develops as  
92 perturbations, spanning a wide frequency range, of a largely scale-free ( $\propto f^{-\alpha}$ ) background  
93 state [Sheremet et al., 2016b, 2019b]. Following Freeman [2000a,b], we will refer to these  
94 perturbative patterns of neural activity as “mesoscopic collective activity”<sup>2</sup>.

95 The nonlinear, stochastic character of mesoscopic collective action suggests that the turbu-  
96 lence theory might provide an adequate framework for studying mesoscopic activity dynam-  
97 ics [Sheremet et al., 2019b]. In broad terms, turbulence may be described as a theory of the  
98 internal energy balance in nonlinear, systems with a large number of components whose dy-  
99 namics spans a wide a continuum of scales. Nonlinearity implies interaction across scales,  
100 allowing for a cross-scale flux of energy. In cases where the cross-scale flux has a domi-  
101 nant, well-defined direction, it is often called “turbulent cascade” (e.g., figure 1). Turbulence  
102 was originally formulated as a general hydrodynamic theory, but has evolved to become the  
103 theoretical foundation of disciplines ranging from plasma physics, nonlinear optics, Bose-  
104 Einstein condensation, water waves, aggregation-fragmentation processes, and many oth-  
105 ers [Kolmogorov, 1941, Richardson, 1922, Zakharov et al., 1992a, Frisch, 1995, Nazarenko,  
106 2011]. A key finding of the weak turbulence theory is the existence of equilibrium states of  
107 the multi-scale system, characterized by a self-similar distribution of energy across scales  
108 (the Kolmogorov-Zakharov spectra, Zakharov et al. 1992a, Zakharov 1999). In the research  
109 into brain activity, a concept that has some similarities is the “self organized criticality” hy-  
110 pothesis [e.g., Bak et al., 1988, Beggs and Plenz, 2003].

---

<sup>2</sup>The “mesoscopic collective activity” concept is identical to Freeman’s [1975b] “mass action”. We prefer “collective action” because the word “mass” has a reserved meaning in physics.

111 Because mesoscopic collective action is macroscopic with respect to cell scale processes, pre-  
112 vious research into mesoscopic brain activity has approached the problem either using the  
113 statistical-physics formalism [e.g., Nykamp and Tranchina, 2000, Cai et al., 2004, Ly and Tranchina,  
114 2007, Rangan et al., 2008, Bressloff, 2011] or thermodynamics/hydrodynamic formulations  
115 (e.g., Wilson-Cowan class of fundamental equations, Wilson and Cowan, 1972b, 1973, Cowan  
116 et al., 2016, Amari, 1975, 1977, Deco et al., 2008) The statistical-physics approach character-  
117 izes macroscopic states by probability densities (configurations) of microscopic states, and de-  
118 rives macroscopic equations applying averaging operators to microscopic physics. The ther-  
119 modynamic approach defines the macroscopic state in terms of observable (macroscopic)  
120 state variables and postulates their balance equations. The statistical description founded  
121 on microscopic dynamics. It can capture in principle the full statistical details; in practice,  
122 however, it inherits from microscopic dynamics a very large number of degrees of freedom.  
123 The resulting equations may be very complicated and give rise to closure problems. The ther-  
124 modynamic approach is simpler, effective, and is easy to construct, but at least in principle  
125 in principle is more limited than the statistical physics approach, due to fundamental quasi-  
126 equilibrium assumption and its postulated foundation.

127 This study is motivated by long-term goal of understanding mesoscopic collective activity in  
128 the framework of the turbulence theory. Here, we introduce a new thermodynamic formula-  
129 tion of mesoscopic collective activity, and discuss its basic linear properties.

130 We adopt the thermodynamic formulation, both because its relative simplicity and its well-  
131 established history. The key equations were derived by Wilson and Cowan [1972b, 1973] and  
132 further refined by Amari, 1975, 1977, Wright and Liley, 1995b, Jirsa and Haken, 1996, 1997,  
133 Robinson et al., 1997, Cowan et al., 2016 and many others (see, e.g., reviews by Deco et al.  
134 e.g., 2008, Coombes et al. e.g., 2014, Cowan et al. e.g., 2016; because of their common funda-  
135 mental principles, we refer below to models that are based on the Wilson-Cowan and Amari  
136 formalism as WC/A models). The model presented here, which belongs firmly to the WC/A  
137 class of models, was derived in response to the realization that all models of this class con-  
138 tain a curious deficiency. While the deficiency not detract from the value and success of the  
139 WC/A models, it does make current formulations ill suited for investigating turbulent aspects  
140 of mesoscopic brain activity. Indeed, the Wilson-Cowan (WC) class of models generally are  
141 formulated as a relationship between the local firing rate and incoming pulses in the element  
142 of area. In thermodynamics, this is largely equivalent to describing the evolution of a phys-  
143 ical system only in terms of its exchanges with the external systems, i.e., in term of process  
144 variable. Because no state variables are defined, therefore the state of the system remains  
145 unknown. Amari's [1975, 1977] approach corrected the issue to a degree, however, one may  
146 argue that the use of an "averaged membrane potential" as state variable may lead to difficul-  
147 ties because the quantity is ill defined during the explosive depolarization of a spike (Amari  
148 did not, in fact elaborate on the definition of this quantity). However, an explicit and accurate  
149 characterization of the state of the system is essential for investigating a turbulent system,  
150 because the distribution of the state variable over the internal scales of the system is related  
151 to the distribution of energy, which drives the energy cascade, i.e., the evolution of the system  
152 itself.

153 It is possible that this deficiency is the result of an original lack of interest in a rigid ther-  
154 modynamic formalism, maybe too fastidious for many practical purposes. While correcting  
155 this deficiency is in itself a relatively small point, a consistent thermodynamic formalism has,  
156 however, a number of advantages: it provides a clear statement about the physical postulates



157 underpinning the model; it defines state and process variables; it allows for an explicit de-  
158 scription of the energy redistribution over scale in the collective activity system. The process  
159 also requires some changes in the formulation of standard functions such as the activation  
160 function. The resulting model is different enough from its “parent” WC/A class to warrant a  
161 closer examination of its basic properties.

162 Section 2 discusses LFP measurements that form the basis of the turbulence hypothesis. We  
163 provide a short review of the WC/A class of models in section 3. In section 4 we discuss  
164 what has arguably become the standard dynamical-kinetic-thermo/hydrodynamic modeling  
165 framework used for the representation of physical systems; we introduce the powder-keg  
166 paradigm, and we derive the governing equations of the thermodynamic model. The powder-  
167 keg model is compared to the standard Wilson and Cowan [1972b, 1973] and Amari [1975,  
168 1977] models in section 5. Elementary simplifications that bring the equations to an analytically-  
169 tractable form are discussed section 6, and some rudiments of linear analysis are presented  
170 in sections 7 and 8 single- and dual-type neural fields. We conclude with a discussion of the  
171 results (section 9). Details of the formulation of the new activation function, the positive-  
172 definite character of the state variables (internal “kinetic” energy and excitability), and alge-  
173 braic details of the growth rate and dispersion relation derivation for dual-type neural fields,  
174 are given in the appendices.

175

## 2. MOTIVATION

176 Recent investigations of hippocampal LFP in rats show a strong relation between energy input  
177 into the hippocampus (as inferred based on rat speed) and the nonlinear character of neural  
178 activity [Sheremet et al., 2016b,a, 2019b,a]. Both spectra and bispectra are well ordered with  
179 input power, as parameterized by rat speed. The redistribution of increased power over scales  
180 (frequencies) shows remarkable organization, as sketched in figure 1. In summary:

- 181 • At low frequencies, the power increase is highly localized to theta and its harmonics. Theta  
182 power increases by a factor of 4 and becomes strongly nonlinear (highly skewed and asym-  
183 metric; up to 5 harmonics can be clearly identified, Sheremet et al., 2016b). Frequency bands  
184 adjacent to theta and harmonics (e.g.,  $f < 6$  Hz, or  $10 < f < 14$ ) show a marked depletion of  
185 power.
- 186 • At high frequencies, gamma power increases by a factor of 2, but its power increase dis-  
187 tributes through a process that may be described as a front moving across scales: gamma  
188 modes grow and plateau sequentially, starting at the lower frequencies ( $f \approx 60$  Hz) and pro-  
189 gressing toward higher frequencies.
- 190 • As power grows, gamma develops significant nonlinear coupling with theta.
- 191 • The process of redistribution of power over scales process is reversible: if power levels  
192 retreat to initial values, the initial scale-distribution of power (spectrum) is recovered.
- 193 • At the lowest levels of power observable, the scale-distribution of power is nearly self-  
194 similar (power spectrum of the form  $f^{-\alpha}$ , with  $\alpha > 0$ ). We refer to this as the background  
195 spectrum (state). The background spectrum may be identified with a dynamic equilibrium  
196 point, i.e., a state that may be maintained indeterminately, but requires energy input.

197 If one identifies mesoscopic collective action with the gamma band, our observations suggest  
198 that these processes are perturbations of a dynamical equilibrium state (background state),  
199 and that increased power input in the theta band triggers a scale redistribution of gamma  
200 power. This evolution is tantalizingly similar to the energy cascade in a turbulent system.

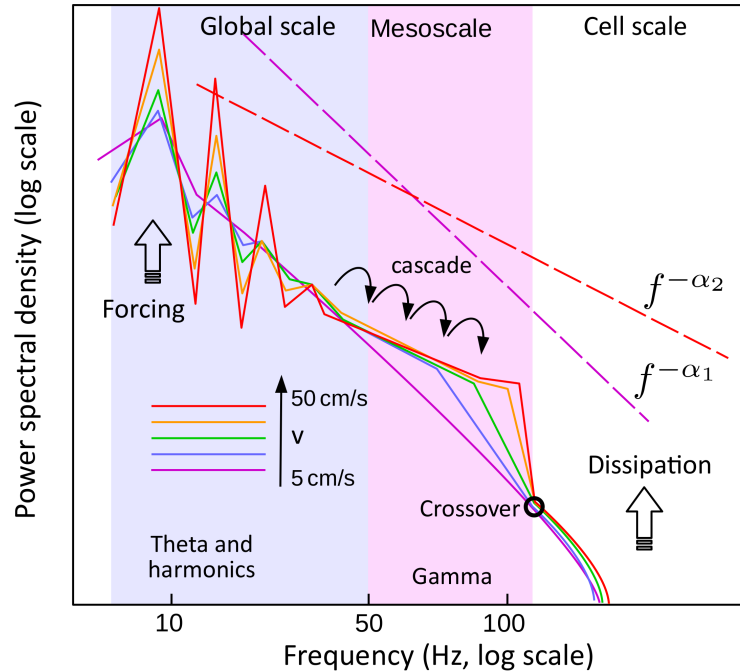

FIGURE 1. A cartoon of the typical evolution of the power spectrum of the hippocampal LFP with rat speed, that summarizes observations discussed in Sheremet et al. [2019b]. The evolution of the spectrum shows remarkable ordering by speed (e.g., from 5 cm/s to 50 cm/s, violet to red). Power increases by a factor of 4 in the theta band (blue rectangle), with theta and harmonics becoming prominent, while the gamma band exhibits a transformation that could be described as a spectral front shifting toward higher frequencies, up to the upper bound of the gamma band (black circle, crossover point), beyond which the spectrum no longer responds to forcing. This evolution suggests that nonlinear interactions between different frequency components result in a behavior similar to a turbulent cascade: the power received from external forcing in the theta band generates a net spectral power flux from low frequencies (theta) toward high frequencies. The crossover point (black circle at about 130 Hz) signals a significant shift the dominant physics. On the left side of it, in the gamma frequency band, nonlinear interactions dominate; on the right side physics are dominated by dissipation. The fundamental difference between the gamma activity and higher-frequency (cell-scale) activity supports the hypothesis that collective activity is macroscopic with respect to cell-scale processes. The spectral evolution is associated with a change in the overall slope of the spectrum ( $\alpha_1$  corresponds to low speeds;  $\alpha_2$  to high speeds).

201

### 3. SHORT REVIEW OF NEURAL POPULATION MODELS

202 The beginning of the development of neural population modeling can be traced back to Beurlé  
 203 and Matthews [1956], who proposed an “update” equation to describe the propagation of  
 204 large scale brain activity in networks composed of excitatory neurons, with applications to  
 205 problems ranging from understanding the generation of LFP rhythms to visual hallucinations  
 206 [Nunez, 1974, Milton et al., 1993, Ermentrout, 1998, Larter et al., 1999, Curtu and Ermen-  
 207 trout, 2001, Robinson, 2006, Pinto and Ermentrout, 2001a, Amari, 1977, Freeman, 1975b,

208 Huang et al., 2004, Deco et al., 2009, Coombes et al., 2014, Muller et al., 2014], and with ap-  
209 proaches ranging from detailed descriptions of randomly connected neurons transmitting  
210 all-or-nothing signals to hierarchically structured networks whose dynamics involve multi-  
211 ply spatial and temporal scales [Amari, 1975, Jirsa and Haken, 1997, Robinson et al., 2002,  
212 Breakspear et al., 2003, 2004, Breakspear and Stam, 2005, Nunez and Srinivasan, 2006, Deco  
213 et al., 2008, Mejias et al., 2016, Breakspear, 2017].

214 The mass action description [Wilson and Cowan, 1972b, Da Silva et al., 1974, Jansen and Rit,  
215 1995, Marreiros et al., 2008] may be the simplest approach to population modeling, actively  
216 used since the 1970s to understand LFP rhythms, and deriving naturally from the concept of  
217 activity synchronization (e.g., Kuramoto, 1975, Strogatz, 2000). The key assumption is that  
218 at some local scale the activity of individual neurons is strongly synchronized and coherent,  
219 and thus one may describe it as the mean activity of the local neural mass, with interacting  
220 “masses” of neurons, such as excitatory and inhibitory neurons in different layers of cortex,  
221 modeled by a small number of equations, each describing the mean activity of a distinct neu-  
222 ral “mass”. Theoretical treatments with empirical synaptic and input-response functions are  
223 possible (e.g., Freeman, 1979, Jansen and Rit, 1995, Miller et al., 2003, Stefanescu, 2011, Jirsa,  
224 2011). The “mass” approach provides the building blocks for brain network models (e.g.,  
225 Freeman 1975b, Breakspear et al. 2004, Breakspear and Stam 2005, Wong 2006, Honey et al.  
226 2007, Deco et al. 2009, Jirsa et al. 2010, Woolrich and Stephan 2013), which treat the cortex  
227 as a discrete network of dynamical nodes (the neural “masses”) coupled through the connec-  
228 tome, essentially incorporating neural “masses” into a larger system that helps to understand  
229 topological significance of connections in organizing cognition, and functional correlations  
230 across brain regions. It should be clear, however, that this approach is in its essence a large  
231 scale model that lumps laminar neuronal tissues into discrete mass points, and thus does not  
232 resolve smaller-scale details such as mesoscale spatio-temporal patterns. The approach is not  
233 universally accepted and may lead to contradictory conclusions regarding large-scale brain  
234 dynamics [Breakspear, 2017]. Neural “mass” models may be developed into more compli-  
235 cated representations. For example, instead of using the spatial mean, the state of the neural  
236 population, one could follow a statistical mechanics approach and describe the neural “mass”  
237 using the probability distribution of neuron states. Under the assumption that the diffusion  
238 approximation holds true, one may derive Fokker-Plank-type stochastic equations (e.g., Kar-  
239 dar, 2007b,a; for applications to neural masses see e.g., Friston, 2010, Omurtag et al., 2000,  
240 Fourcaud and Brunel, 2002, Harrison et al., 2005, Ma et al., 2006, Deco et al., 2008, El Boustani  
241 and Destexhe, 2009; or fractional versions, Linkenkaer-Hansen et al., 2001, Lundstrom et al.,  
242 2008), useful for describing the evolution of network synchrony.

243 A next step toward a more flexible description of collective neural activity is to discard the  
244 concept of a “mass” of synchronized neurons and treat the cortex as a continuum, with the  
245 properties of the local neural population changing continuously in space and time. This class  
246 of models are referred to as neural-field models (see e.g., Ermentrout, 1998, Coombes, 2003,  
247 Deco et al., 2008, Cowan et al., 2016, Breakspear, 2017, Muller et al., 2018b, as well Gerstner  
248 et al., 2014, Coombes et al., 2014, Troy, 2008, Hoyle and Hoyle., 2006, Winfree, 2001). Their  
249 distinguishing characteristic is the elimination of the “individual neuron” concept. Instead,  
250 the dynamics of collective neural activity is described by a small number of fields, say  $\varphi_j(x, t)$ ,  
251 where  $\varphi_j$ , with  $j = 1, \dots, N$  are  $N$  variables that characterize completely (in the sense of clos-  
252 ing the system of equations) the neural field. The first such model was introduced by Beurle  
253 and Matthews [1956], who proposed an “update” equation to describe the propagation of

254 large scale brain activity in networks composed of excitatory neurons. The model was re-  
255 visited and extended by Wilson and Cowan [1972a, 1973], Nunez [1974], and Amari [1977].  
256 A major limitation of the early Beurle and Matthews [1956] neural field model was its ne-  
257 glect of refractoriness or any process to mimic the metabolic restrictions placed on maintain-  
258 ing repetitive activity. Wilson and Cowan [1972a, 1973] The landmark model of Wilson and  
259 Cowan [1972a, 1973] coupled excitatory and inhibitory populations corrected this issue, and  
260 was successfully used to understand pattern dynamics such as oscillations and hysteresis,  
261 that shed light on real biology. The model proposed by Nunez [1974] links synaptic action  
262 to action potential firings, which allowed for periodic-wave solutions and sustained oscilla-  
263 tions. The novelty of the model proposed by Amari [1977] was the inclusion of the “average  
264 membrane potential” as a state variable, coupled with firing rate. By assuming Heaviside  
265 activation function, Amari successfully derived solitary wave solutions for the model which  
266 opened a world of theoretical approximation on integral type of neural field equations.

267 Toward the beginning of this century, field models gained increasing popularity, which brought  
268 increased, systematic scrutiny of their properties, and additional refinements. Ermentrout  
269 and McLeod [1993], Ermentrout [1998], Osan and Ermentrout [2001] proposed a model that  
270 introduced a state variable similar to the membrane potential in Amari’s model, by integrat-  
271 ing the firing rate (incoming energy flux, a process variable), and conducted an analysis of  
272 the existence and stability of solutions, including wave fronts and traveling pulses. Jirsa and  
273 Haken [1996, 1997] modified the Wilson and Cowan [1972a, 1973] models to account for  
274 axonal-delay effects proportional to the span of connections, and thus allowed wave solu-  
275 tions that arise as result of axonal propagation. Interested in electrocortical waves, Wright  
276 et al. [1994], Wright and Liley [1995a, 1996], Robinson et al. [1997], Freeman [1991] intro-  
277 duced another population model of coupled excitatory and inhibitory neurons following ear-  
278 lier work by Freeman [1991], Their model could be in fact regarded as a variant of the modi-  
279 fied the Wilson and Cowan [1972a, 1973] model accounting for axonal delay (similar to [Jirsa  
280 and Haken, 1996, 1997]), but including no refractory period, and with a specific temporal  
281 weighting function comprising effect of synaptic delay and depolarization decay.

282 Wave propagation, and in general, the evolution of spatio-temporal patters in the cortex, ar-  
283 guably plays a central role in understanding collective activity dynamics. One of the earliest  
284 systematical derivations of traveling wave front solutions (arguably a simplest wave-like pat-  
285 tern) is due to Ermentrout and McLeod [1993], Ermentrout [1998]; although derived in a  
286 highly restricted formulation, their results, such as estimated velocity of activity propagation,  
287 shed light on biological information transfer. The role of inhibitory neurons in the forma-  
288 tion and propagation of collective activity waves in a neural field is one of the fundamen-  
289 tal results of recent studies (although the mechanism is not fully understood; see e.g., Wulff  
290 et al. [2009], Castro and Aguiar [2012], Stark et al. [2013], Amilhon et al. [2015], Neske et al.  
291 [2015], Hattori et al. [2017]). The interactions between excitatory and inhibitory neurons  
292 are believed to play an essential role in the dynamics and information processing of neural  
293 populations. The Wilson and Cowan [1972a, 1973] model and derivatives and known to have  
294 a rich set of spatio-temporal patterns, including oscillatory solutions in dual-type networks  
295 (including excitatory and inhibitory neurons; Wilson and Cowan, 1972a, 1973, Nunez, 1974,  
296 Larter et al., 1999, Robinson et al., 2002, Breakspear et al., 2003, Robinson, 2006); traveling  
297 wave fronts [Amari, 1977, Ermentrout, 1998, Pinto and Ermentrout, 2001a]; periodic pro-  
298 gressive waves [Nunez, 1974, Amari, 1977, Robinson et al., 1997]; standing pulse solutions  
299 [Ermentrout, 1998, Amari, 1977, Pinto and Ermentrout, 2001a]; spiral waves [Milton et al.,



1993, Osan and Ermentrout, 2001, Huang et al., 2004]; and maybe others. These patterns have formed the basis for experimental observations regarding the generation of sustained and propagating activity patterns in several brain regions Pinto and Ermentrout [2001a], Ermentrout and Kleinfeld [2001], Wu et al. [2008], Muller et al. [2018a]. It is important to note that excitatory-inhibitory neuron interaction is not the only mechanism of pattern formation. Purely excitatory networks support oscillatory solutions and traveling pulses [Curtu and Ermentrout, 2001, Pinto and Ermentrout, 2001b] as well as periodic traveling waves [Meijer and Coombes, 2014]. While inhibition (inhibitory neurons, spike frequency adaptation and refractoriness; Ermentrout and McLeod, 1993, Pinto and Ermentrout, 2001a, Huang et al., 2004 ) plays an essential role in the formation and propagation of these patterns, its source is not well understood: models tend to produce patterns that agree qualitatively with observations, but with large quantitative deviations from observations that are still unexplained. Curtu and Ermentrout [2001] showed that the ratio of absolute refractory period over time constant should be  $>5$ , resulting a oscillatory period derived is between 1.4 and 4 in refractory period units. Likewise, propagating pulses and periodic waves discussed in the works of Pinto and Ermentrout [2001b] and Meijer and Coombes [2014] have time scales of the same order of magnitude as absolute refractory periods, which does not agree with large ratio of absolute refractory period to membrane reaction time necessary for sustained propagating patterns (in the Wilson-Cowan model the absolute refractory period needed for propagating waves is in the order of 10 time-constant units (at least 40 ms, while membrane reaction time, or time constant, is  $\approx 10$  ms).

While this brief review of collective activity models does not even come close to doing full justice to all the research effort dedicated to the problem, it should highlight some of the peculiarities of its history: the brilliant and rather ad-hoc ideas, the late intersection of their evolution with other well-developed, mature branches of physics such thermodynamics, statistical mechanics, and kinetics. This is reflected in the peculiar usage of state and process variables, the lack of a systematic approach to the study of the dynamics of spatio-temporal patterns. Interestingly, this is not for the lack of enthusiasm (e.g., Freeman, 2000a,b, 2006, 1975a, Freeman and Vitiello, 2010, 2006 to cite one of the most enthusiastic investigator of collective activity). Still, the remarkable persistence of the Wilson and Cowan [1972a, 1973] model as a key, fundamental formulation for neural-field activity is reflected in that all subsequent models are closely related to the original delayed form of Wilson and Cowan [1972a, 1973] equation, either directly deriving from it, or reduce to it through time coarse-graining. This implies that the mechanisms and capability of field models have changed little over a long history, and suggests that their rich reservoir of solutions met most expectations in terms of reproducing occasionally observed patterns in recordings. This may also, however, be the result of rather intermittent, occasional interest in collective activity (stemming mostly from practical computation interests), perhaps obscured by the dominance of the philosophical view known as “multiplexing”, that postulates that neurons function in a way similar to electronic components hardwired on a circuit board in a computer. If the latter were true, then collective activity would be indeed at most of a secondary concern. However, as observations and hypotheses accumulate that contradict the “multiplexing” model, such as the degeneracy and role of turbulence and self-organized criticality in collective neural activity (e.g., Edelman, 1987, Edelman and Gally, 2001, Beggs and Plenz, 2003, Shew et al., 2011, Beggs and Timma,



344 2012, Sheremet et al., 2018a, 2019b and others), or perhaps simply due to the growing inter-  
345 est in mesoscale processes, the capabilities of the Wilson and Cowan [1972a, 1973] model  
346 are bound to undergo further scrutiny.

347 So far, collective activity patterns have been studied from a perspective reminiscent of the  
348 theory of pattern formation in dynamical systems, in the sense that particular patterns have  
349 been identified and studied in isolation. Solutions in a given model with physiological param-  
350 eters determined are confined by and large to a single scale. However, waves generated in a  
351 single brain region are never confined in a single scale, but always corresponds to a spectrum  
352 spanning at least the domain from 1 Hz – 300 Hz. The dynamics of the spectral distribution  
353 of energy in a hippocampus LFP raises a number of questions (e.g., Sheremet et al., 2017,  
354 2018a, 2019b) that cannot be addressed directly using the current formulations. While the  
355 value of the Wilson and Cowan [1972a, 1973] formulation is beyond dispute, a number of  
356 small changes are needed to address the problem of the spectral evolution. The rest of this  
357 paper is dedicated to the discussion of these modifications.

#### 358 4. A THERMODYNAMIC MESOSCOPIC MODEL FOR NEURAL FIELDS: THE POWDER-KEG PARADIGM

359 4.1. **Microscopic vs macroscopic**<sup>3</sup>. The words “macroscopic” and “microscopic” are used  
360 here as a non-dissociable pair of relative terms, that define two fundamental scales coexist-  
361 ing in the system, governed by fundamentally different physical laws. The microscopic scale  
362 refers to processes that involve some atomic (in the etymological sense of “not further divis-  
363 ible”) elements of the system. If the system has a large-enough number of atomic elements,  
364 collective behavior might emerge, in which the contributions of individual atom are indis-  
365 tinguishable (e.g., atoms may conceptually be interchanged without altering the collective  
366 behavior). Such processes are macroscopic, and are governed by physical laws effectively dif-  
367 ferent that atom-scale processes<sup>4</sup>. The definition of the dual micro/macro scales is arbitrary,  
368 determined by the processes of interest. Micro- and macro- dynamics coexist: for example,  
369 while individuals participating in a stadium wave may eat, read a newspaper, chat in pairs,  
370 etc, to create a stadium wave all they are asked to do is stand and sit in synchrony with the  
371 rest of the group.

372 The word “scale” is used below with two additional meanings. As common in physics, the  
373 generic term “scales” is used to refer to wave numbers or frequencies in the Fourier repre-  
374 sentation. Neuroscience also defines two absolute scales: the “brain (or global) scale”, and  
375 the “cell scale”. The global scale refers to processes that span a significant part of the entire  
376 brain. The cell scale refers to processes that involve individual neurons, the natural “atoms”  
377 of the cortex, whose physics are described, say, by the Hodgkin and Huxley [1952] model.

378 Therefore, ignoring sub-cell processes, we will define here the cell-scale as microscopic.

379 The definition of the dual macroscopic scale deserves more discussion. Following the reason-  
380 ing discussed above, the macroscopic scale is the scale where collective behavior emerges.  
381 The existence of a spectral crossover point in the neighborhood of 130 Hz (figure 1), suggests

---

<sup>3</sup>The ideas below are elementary. We discuss them here only because they reflect a certain choice of terms, and for benefit of readers less familiar with statistical physics.

<sup>4</sup>A classical example of macroscopic behavior qualitatively distinct from microscopic physics is Boltzmann’s H-theorem for the idea gas. The (microscopic) dynamics of the gas particles is Hamiltonian, conservative and reversible; the (macroscopic) dynamics of the entire system is irreversible toward equilibrium (e.g., Boltzmann, 1872, 2003, Alexeev, 2004, Pathria and Beale, 2011).

382 that gamma oscillations are governed by different physics than the cell (microscopic) scale,  
383 implying that mesoscopic activity is macroscopic in relation to cell scale. If the number of neu-  
384 rons entrained in these processes, say, in the order of  $O(10^4)$  seems small, it is important to  
385 note that order of magnitude of the number of atomic constituents needed for macroscopic  
386 behavior is not an a priori given number, but depends on the system under consideration.  
387 moreover, the emergence of macroscopic behavior also depends on microscopic mixing, i.e.,  
388 strength of interaction between atomic components. Strong microscopic mixing promotes  
389 macroscopic behavior. In his sense, micro-macro duality is the expression of the dynamics of  
390 the system, and not of some absolute number of components. This observation has impor-  
391 tant consequences for brain activity. If neurons are hardwired like fixed electronic circuits, in  
392 unique patterns that assign neurons unique specific functions, there can be no mixing, no mi-  
393 croscopic randomization, and therefore the “macroscopic” behavior is trivial (and irrelevant).  
394 However, evidence suggests that this is not the case. Synapses have a limited life-span, lasting  
395 only a few weeks [Attardo et al., 2015, Holtmaat et al., 2005, Xu et al., 2009, Xiao et al., 2009].  
396 Mossy fibers from a granule neuron have up to 200 different synaptic inputs onto a wide va-  
397 riety of neurons [Amaral et al., 2007] and a single pyramidal neuron has over 30,000 synaptic  
398 inputs (e.g., Megias et al., 2001). These observations indicate that circuit model descriptions  
399 are not suitable for the cortex Maley [2018], and that the cortex structure is consistent strong  
400 nonlinear mixing [Buzsaki, 2006] and degeneracy [Edelman, 1987, Edelman and Gally, 2001].  
401 We hypothesize that mesoscopic processes are macroscopic with respect to cell scale.

402 The distinction between macroscopic and microscopic descriptions (models) is particularly  
403 useful for systems whose exact microscopic state is impossible to measure. Although macro-  
404 scopic dynamics should arguably be the direct result of microscopic dynamics, an explicit  
405 and formal derivation of macroscopic laws starting from microscopic physics is in general ex-  
406 tremely difficult to construct. There are only a handful of very simple physical systems for  
407 which this connection is well understood (e.g., Alexeev, 2004, Kardar, 2007b). For practical  
408 purposes such a derivation is also in general not needed (see also the discussion below).

409 **4.2. Dynamical, kinetic, and thermodynamic/hydrodynamic descriptions.** Historically,  
410 the dynamical, kinetic and hydrodynamic/thermodynamic approaches for modeling physi-  
411 cal systems with a large number of components were developed to explain how macroscopic  
412 physics emerges from microscopic dynamics. Statistical mechanics and kinetic theory are  
413 well understood for particle systems, and have been later generalized to other fields (e.g.,  
414 magnetization) with various degrees of detail. The ideas below are elementary and may  
415 be found in any textbook of statistical mechanics textbook, (e.g., Gibbs 1902, Tolman 1938,  
416 Khinchin 1949, Kittel 1958, Pathria and Beale 2011 and many others) and kinetic theory (e.g.,  
417 Boltzmann, 1872, 2003, Alexeev, 2004, Pathria and Beale, 2011, Kardar, 2007b,a, Tong, 2012  
418 and many others).

419 Because the goal of this study is to formulate a thermodynamic model of collective (meso-  
420 scopic) activity, we provide here a sketch of these stages of modeling. Consistent with the  
421 fundamental work of Wilson, Cowan, and Amari, we follow what we believe is a consistent  
422 line of reasoning that allows for formulating the macroscopic laws governing collective activ-  
423 ity.

424 **4.2.1. The dynamical model.** A dynamical model is the collection of the evolution equations  
425 that describe the dynamics of each microscopic atomic component. In the case of an ideal  
426 gas made of a large number of identical particles, the fundamental law of mechanics Arnold

427 [1974] states that the mechanical state of a particle is completely defined by 6 degrees  
428 of freedom (three position components and three velocity components). For the brain, the  
429 number of equations included in the dynamical description equals the number of neurons  
430 described, times the number of degrees of freedom that describe the cell in, for example, the  
431 Hodgkin and Huxley [1952] model. Note that the dynamical model is fundamentally “phe-  
432 nomenological”, i.e., assembled together based on its capability of describing what is assumed  
433 to be the most relevant features of cell dynamics (in this case, the action potential). Its privi-  
434 leged status of fundamental model comes for the decision to ignore the sub-atomic (i.e., sub-  
435 cell in the case of the brain) physics. The dynamical equations are “deterministic” in the sense  
436 that if the initial conditions were known for each molecule, the equations of motion could, at  
437 least in principle, be integrated exactly. However, for practical applications the dynamical  
438 system is largely useless, for at least two reasons: the system of equations is too large to be  
439 solved directly in any practical application, and the exact initial conditions are not known.

440 For simplicity, we postulate that all neurons of a given type (e.g., excitatory) are physiologi-  
441 cally identical<sup>5</sup>. Because this prototypical neuron may be defined through some averaging, it  
442 will be referred to as “mean neuron”. We assume that the key dynamics of the mean neuron  
443 are described by the standard “leaky integrate and fire” model of the action potential (figure  
444 2.a). For example, the mean neuron is excitable if its membrane polarization is subthreshold  
445 ( $\lesssim -50$  mV, state (A) in figure 2.a). In this state the average potential fluctuates approximately  
446 between  $-70$  mV and  $-50$  mV<sup>6</sup>, due to small post-synaptic potentials, ion currents associated  
447 with membrane channels, etc. In state, the neuron is “excitable”, i.e., ready to fire. We refer to  
448 this state as the “background” state. If synaptic input is zero, the potential of the mean neuron  
449 decays to the resting state ( $\simeq -70$  mV). If the input stimulus is large enough (state B in figure  
450 2.a), it can trigger a spike (state C). After the spike, the neuron enters the hyperpolarization  
451 stage and slowly depolarizes (state D), returning to the original mean state (A). State (B) may  
452 be seen as a perturbation of the mean state (A), that triggers firing. During the spike (C) the  
453 neuron is “unavailable”, it does not respond to stimuli (absolute refractory state). In the hy-  
454 perpolarization/recovery stage (D) the neuron is in relative refractory state: it is excitable,  
455 but it requires more energy input, relative to the background state (A), to trigger an action  
456 potential.

457 4.2.2. *The kinetic model.* The kinetic theory is the first step toward a macroscopic descrip-  
458 tion. The macroscopic state has by definition a much smaller number of dimensions, therefore  
459 one macroscopic state must correspond to a large number of microscopic configurations (e.g.,  
460 Kardar, 2007b). Because the exact microscopic configuration is not accessible the macro-  
461 scopic level, the macroscopic state of the system is described by  $n$ -component, joint probabil-  
462 ity density functions (PDF). A statistical description of the system amounts to a set of equa-  
463 tions that describe the evolution of these distributions. The number of unknown functionals  
464 remains still dauntingly large, but some progress may be made if one restricts the effort to  
465 describing the PDF of a single component (e.g., macroscopic observations are local averaging  
466 operators based on the 1-component PDF). However, the evolution of 1-component distri-  
467 bution depends on the 2-particle distributions, which in turn depends on 3-particle one etc.

---

<sup>5</sup>This should be interpreted in the same sense as the statement “All cars on the road are Camrys”. The cars  
the all have the same mechanical characteristics, but can travel at different speeds, accelerations, etc.

<sup>6</sup>These values are given for illustration purposes only; in actuality they depend on the type of neuron  
considered.

468 This hierarchy of dependencies is known as the BBGKY hierarchy (Bogoliubov-Born-Green-  
469 Kirkwood-Yvon e.g., Alexeev, 2004, Kardar, 2007a, Tong, 2012). The system of equations is in-  
470 finite and unsolvable unless a closure exists. The celebrated Boltzmann equation, also known  
471 as the kinetic equation, is an example of quasi-Gaussian closure, where the higher-order joint  
472 PDFs may be factorized into products of the 1-particle PDF. The kinetic description is sto-  
473 chastic, in the sense that two macroscopic states (characterized by the same density function)  
474 represent many distinct realizations of microscopic configurations. This approach may be  
475 characterized as neither entirely microscopic nor entirely macroscopic: while the exact mi-  
476 croscopic state is not specified, some information about the microscopic states is preserved  
477 in the probability density functions.

478 Accepting for now the conventional description of membrane-potential evolution shown fig-  
479 ure 2, the kinetic state of the neural population is characterized by the PDF of membrane  
480 potential (figure 3). At any time  $t$  and position  $x$  the fraction of the neural population with the  
481 potential below the threshold is excitable in various degrees and may be triggered to spike;  
482 the rest of the population is firing (absolute refractory time). A fraction of the energy of the  
483 spike is passed along to other neurons through network connections; the rest is lost through  
484 various processes, such as electromagnetic radiation and ineffective connections. The back-  
485 ground state could be interpreted as a steady, spatially uniform state in which the energy re-  
486 captured from spikes matches exactly the loss of internal energy to maintain its global mean  
487 energy level (dark green line in figure 3). In this representation, mesoscopic action processes  
488 are perturbations of the background state that locally change the membrane potential (bright  
489 green line). For example, a local increase in the internal energy shifts the distribution of neu-  
490 ron trigger energy toward the threshold, increasing the firing rate, and, as a consequence, the  
491 amount of recaptured energy and the internal energy of the system.

492 *4.2.3. The thermodynamic limit.* If the system is at macroscopic equilibrium or if its evolution  
493 is not too fast, the kinetic equation may be recast in the regular thermodynamic/hydrodynamic  
494 conservation laws (e.g., Alexeev, 2004, Tong, 2012). These equations are truly macroscopic,  
495 in the sense that all information about the existence of a microscopic structure is lost and re-  
496 placed entirely with a macroscopic description. For example, the flow of fluid is completely  
497 described by the fields of pressure and flow velocity. This description is again deterministic: if  
498 the macroscopic state is known accurately, the future macroscopic state is exactly predictable.  
499 It is important to note that thermodynamic models have been (and still are) developed with-  
500 out the need of an explicit representation of, and derivation from, the underlying microscopic  
501 physics. This is in fact the whole point of the “macroscopic” concept: the governing laws are  
502 formulated for the observable (macroscopic) reality; the microscopic world is not observable.  
503 In this sense, any physical model is phenomenological.

504 The full modeling cycle starting from the dynamical description and ending in the thermo-  
505 dynamic limit has been examined in detail only for a handful of systems (e.g., Alexeev 2004).  
506 The vast majority of physics is based on phenomenological models whose connection to some  
507 underlying microscopic structure either is not well understood, or is inconsequential for the  
508 macroscopic description. In the brain duality of microscopic (cell-scale) to macroscopic (col-  
509 lective activity) scales, the WC/A class of models belong to the thermodynamic limit.

510 *4.2.4. Collective-activity turbulence.* If collective activity is macroscopic with respect to cell  
511 scale, then the WC/A class of models (or generalizations, see below) should provide an ade-  
512 quate modeling platform for testing the mesoscopic turbulence hypothesis. The turbulence



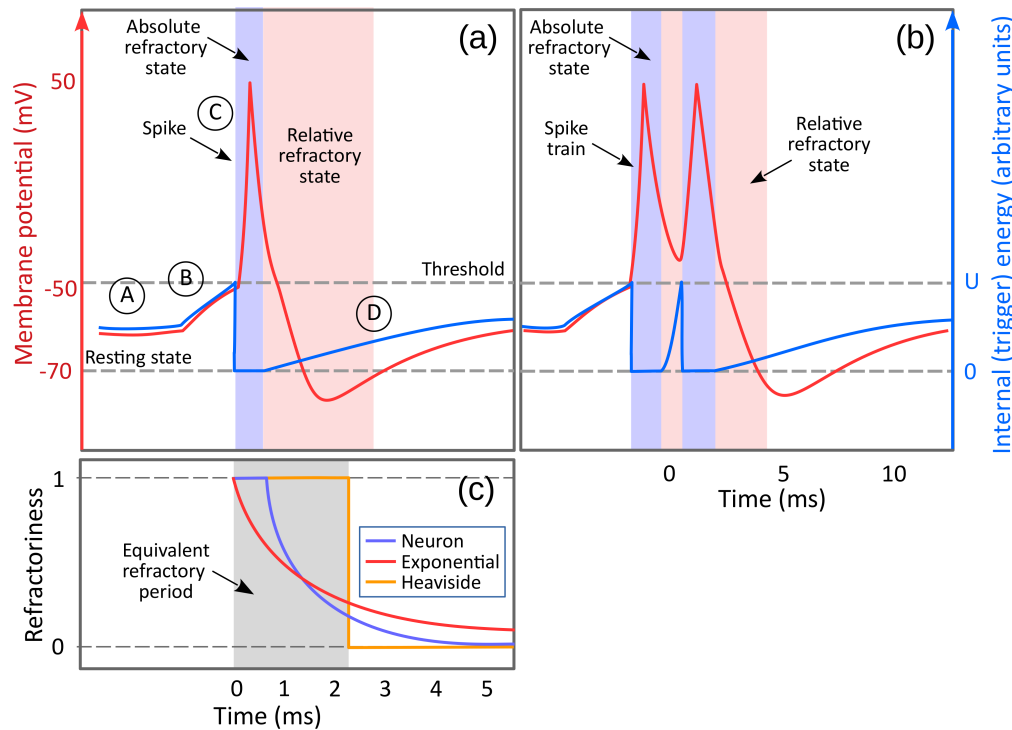

FIGURE 2. A cartoon of the standard “leaky integrate-and-fire” neuron model. *a)* Typical representation of the mean potential evolution including a potential spike (purple) and the definition of “trigger” kinetic energy (blue, see also text for a discussion of the meaning of “kinetic”). The evolution of membrane potential as a succession of states that may be described as “background” state (A); perturbations of the background state that bring the membrane potential to the threshold value (dashed gray), triggering a spike; action-potential spike (A); and post-spike state (D) in which the membrane potential goes into the hyperpolarization state and slowly depolarizes back to the background state (A). Refractory states are represented as colored vertical bands: in the absolute refractory state (blue) the neuron does not respond to stimuli; in relative refractory state (pink) the neuron is increasingly responsive, but the energy input required to fire is higher than in the background state (the excess input needed recedes as the neuron depolarizes). In reality, the average membrane potential is ill defined during the spike, therefore it cannot be used to describe the state of the neuron. The kinetic (trigger) energy of the neuron (blue line), is roughly proportional with the average membrane potential, it is bounded between zero (resting state) and the threshold value ( $U$ ). As a thermodynamic quantity, the kinetic energy is defined in relation to the neural field, therefore it has no meaning when the neuron is not responsive to stimuli, therefore it is set to zero during the absolute refractory period. *b)* Stronger and longer-lasting stimuli may force the neuron into a spike train. Spike trains are represented here as rapid successions of single spikes. A single spike is produced by a short-lived perturbation (B) of the background state that brings the kinetic energy to the threshold and then disappears. If the perturbation is longer than a spike and strong enough, it can trigger a sequence of spikes in rapid succession. *c)* different representations of the refractoriness  $r$  of the mean neuron for a single spike and a spike train. The refractoriness  $r$  is a real number between 0 and 1 that reflects both the absolute and relative refractory states (see text for a discussion). The values of the membrane potential given here are for illustration purposes only; in actuality they depend on the type of neuron considered.



513 formalism is a field theory (e.g., Goldstein et al. 2014, Kardar 2007b,a, Tong 2012; many oth-  
514 ers) that describes the internal redistribution of energy (and other conserved quantities)  
515 over the Fourier scales spanned by the system. The equations governing both hydrodynamic  
516 [Richardson, 1922, Kolmogorov, 1941, Frisch, 1995] and wave turbulence [Zakharov et al.,  
517 1992a, Newell et al., 2001, Nazarenko, 2011] belong to the hydrodynamic class of equations,  
518 in the terminology discussed above. Applied to mesoscopic activity, turbulence describes the  
519 dynamics of multi-scale patterns of collective activity (not individual-cell activity). A brief in-  
520 troduction and references may be found in Sheremet et al. [2019b]. The Fourier components  
521 are the atomic components of the physical system. Because these components are macro-  
522 scopic with respect to cell scale, WC/A models play the role of the dynamical model. The  
523 WC/A model could be solved directly for the evolution of each Fourier mode, but just as with  
524 the microscopic configurations of molecules in an ideal gas, we do not know the exact initial  
525 conditions (in this case, say, the initial phases). Spectral densities represent the distribution  
526 of power over patterns of different scales. This is a kinetic description, stochastic because the  
527 exact microscopic configurations (e.g., initial phases of the patterns) are not resolved. This  
528 description is implied in most of the data analysis techniques used to describe LFP character-  
529 istics; for example, the spectral density is an ensemble averaged quantity. A Boltzmann-type  
530 kinetic equation [Alexeev, 2004] may be derived following the blueprint of the BBGKY hierar-  
531 chy and closure mechanism [Zakharov et al., 1992b, Nazarenko, 2011]. For gravity waves, this  
532 equation is known as the Hasselmann equation [Hasselmann, 1962]; for wave (weak) turbu-  
533 lence theory known as the Zakharov equation (Zakharov et al. 1992b, Zakharov 1999, Newell  
534 2002, Nazarenko 2011 and others). One of the fundamental results of the wave-turbulence  
535 theory is the existence of self-similar spectra, called the Kolmogorov-Zakharov spectra. We  
536 hypothesize that this framework may help shed some light on the formation and the physical  
537 meaning of LFP spectra.

538 **4.3. The powder-keg paradigm.** The conventional representation of the action potential  
539 shown in figure 2 does not translate well into a quantity whose value can be used for ther-  
540 modynamic purposes to describing the state of the neuron. The goal of such a state variable  
541 would be to characterize the state of a neuron as a whole by a single value, e.g., similar to the  
542 mean kinetic energy of a molecule in a gas. The mean membrane potential is a good candidate,  
543 because it is meaningful and descriptive for the microscopic sub-threshold equilibrium states,  
544 when the charge may be thought of as relatively uniformly distributed across the neuronal  
545 membrane. However, a spiking neuron is in a transitional (far from equilibrium) microscopic  
546 state, with charges highly localized as the electrical pulse propagates along membrane. In  
547 such a state, while a value for the mean membrane potential could still be defined, it is much  
548 less representative of the microscopic process.

549 Because a single-value characterization of the membrane potential of a neuron is not possible  
550 during a spike, for thermodynamic purposes, the sub-threshold state and the spiking process  
551 should be treated as two distinct processes. This suggests the thermodynamics of a powder  
552 keg. The term “powder keg” is used here to designate a thermodynamic device character-  
553 ized by two distinct types of energy: a “potential”<sup>7</sup> energy that is released as a spike (equiva-  
554 lent to the potential energy achieved by maintaining different concentrations of separation of

---

<sup>7</sup>The term “potential” is used here in its literal sense, describing energy that is available, but not “realized”, or released.

555 sodium and potassium ions inside and outside the cell); and a “trigger” internal energy, pro-  
556 portional to the keg temperature (equivalent to the mean subthreshold membrane potential).  
557 When the temperature reaches a threshold level, it triggers the release of the potential energy  
558 (trigger voltage-gated ion channels). The powder keg thermodynamics is virtually identical  
559 to the conventional evolution of the membrane potential shown in figure 2: the background  
560 state of the neuron may be seen as the ambient temperature; when it reaches a certain thresh-  
561 old, the keg explodes, analogous to the neuron spike. The refractory state of a neuron may be  
562 simulated by replacing the exploded keg immediately after the explosion with an identical  
563 one whose temperature is initially zero and increases slowly to the ambient value through  
564 heat exchanges due to nearby explosions.

565 If the dynamics of the mean neuron is equated with that of a powder keg, a neural network  
566 may be represented as a large warehouse of powder kegs. The internal energy of the ware-  
567 house is defined as the sum of the trigger energy of the kegs, and it is a variable independent  
568 of the potential energy released by explosions. Assume that the global mean temperature  
569 in the warehouse is somewhere between zero (no kegs explode) and the critical threshold  
570 temperature (all kegs explode). Local temperature fluctuations may cause spatially scattered  
571 explosions. A fraction of the energy released by explosions is recaptured by the system and  
572 increases the ambient temperature; the rest is lost to a variety of other processes such as light,  
573 sound, radiated heat, etc. In the absence of external energy input, explosions provide the only  
574 source of energy that can contribute to the ambient temperature. If no explosions occur, the  
575 temperature of the system naturally decays to a reference value (zero) below the threshold.  
576 An equilibrium state of the system is achieved if the energy recaptured from explosion bal-  
577 ances the natural energy decay and other energy losses.

578 The distinction between internal (trigger) and potential energy in the powder-keg represen-  
579 tation suggests adopting the simplifying assumption that the neuron spike (state C in figure  
580 2.a) and non-firing states represent distinct processes, drawing from distinct pools of energy:  
581 1) the potential energy released by a keg explosion, uses an accumulated source of energy,  
582 that is exhausted in a spike and needs to be replenished, and 2) the internal kinetic energy  
583 of the mean neuron, controlled by ambient network activity. The internal “kinetic” energy of  
584 the mean neuron is roughly proportional to average membrane potential (similar to Amari,  
585 1975). We refer to this quantity as internal “kinetic energy” (as opposed to potential energy)  
586 because it is a direct expression of activity. For example, in an hypothetical “inactive” (but  
587 not dead) system, the mean neuron would be at resting state, i.e., its “kinetic” internal energy  
588 would be zero. Note that we adopt here the convention the internal kinetic energy is zero  
589 in the absolute refractory state, consistent with both the evolution of the neuron during the  
590 relative refractive state, and with the thermodynamic meaning of the internal kinetic energy  
591 as state variable of the system: if the neuron does not participate in the system dynamics, it  
592 does not contribute to the internal kinetic energy of the system. The powder-keg paradigm  
593 is a simplified thermodynamic (macroscopic) representation of a system of identical “leaky  
594 integrate-and-fire” neurons.

595 **4.4. Governing equations.** Below, the space  $x$  and time  $t$  are independent variables, mea-  
596 sured in mesoscopic units, i.e., macroscopic with respect to cell scale. As a consequence, the  
597 duration of a spike is considered infinitesimal. If the neural field comprises several types of  
598 neurons, we denote the neuron type by superscript symbols, e.g.,  $E$  for excitatory and  $I$  for

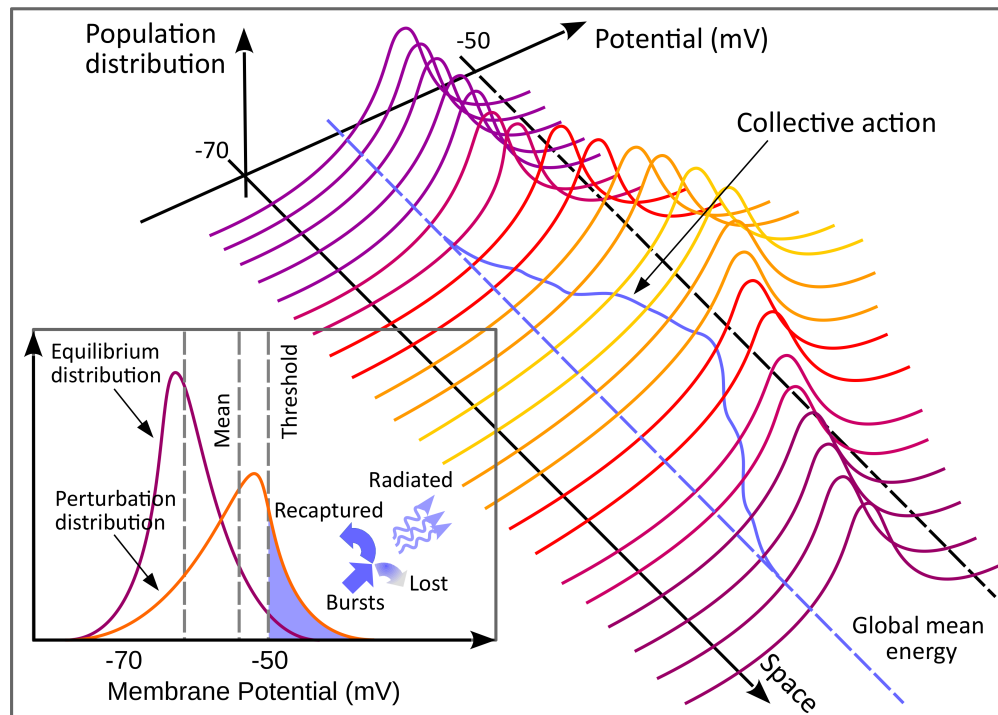

FIGURE 3. A cartoon of the probability distribution of the mean membrane potential over the neuron population in the element of volume. Although the mean membrane potential is ill defined during a spike (see figure 2), we use this representation for convenience. Using for this the correct state variable (trigger energy) is complicated due to being reset to zero after a spike. *Main panel:* Spatial structure of the distribution of internal energy over neuron population. The global mean energy is represented by a blue dashed line. The mean energy is represented by a continuous blue line. Continuous deviations of the mean energy from the global mean represent collective activity. *Inset:* Sketch of possible shapes of the distribution of average membrane potential over the neuron population for the equilibrium state (A) in figure 2.a (purple) and perturbed state (mesoscopic collective action, B in figure 2.a, yellow). The high value tails of both distributions exceed the threshold, implying that an number of neurons fire in both cases. The number of firing events is much larger for the perturbed distributions. In general, the shape of the distribution changes as the mean shifts, therefore the population exceeding the threshold (firing rate) depends not only on the mean but also on the distribution shape (higher moments). A fraction of energy released by spikes (blue arrows) is recaptured by the neural field, and the rest is lost to a host of physical processes.

599 inhibitory neurons. All neurons of a given type are assumed to have identical physiological  
600 properties.

601 Modeled in the powder-keg paradigm, the state of the neural field is completely defined by  
602 two independent state variables: 1) the internal kinetic energy  $u$ ; and 2) the “excitability” of  
603 the neural population, that is the fraction of the population that is excitable. Because the en-  
604 ergy exchange within the neural field is achieved through explosions (spikes and spike trains),  
605 the relevant process variable is a measure of the energy released by the fraction of the neu-  
606 ron population that is firing. In thermodynamics, state variables are extensive quantities. For

607 convenience, we normalize here extensive variables by the number of neurons  $\rho(x)$  in the  
608 element of volume (intensive quantities).

609 The quantity  $u$  is defined as the internal kinetic energy in the element of volume at  $x^8$ , normal-  
610 ized by the number of neurons. This is an intensive quantity that may be interpreted as the  
611 “temperature” (normalized kinetic energy) of the system (not to be confused with the stan-  
612 dard temperature, measured by a thermometer; e.g., Callen, 1960). Therefore,  $0 \leq u(x, t) \leq$   
613  $U$  ( $U$  is the threshold value). Neurons that have non-zero kinetic energy may be triggered  
614 and will be referred to as “excitable”.

615 Excitability is a property dual to refractoriness. The refractoriness of a mean neuron is mea-  
616 sured by the fraction  $r$  of the incoming neurotransmitter flux that is ineffective, satisfying the  
617 conditions:  $r = 1$  in absolute refractory state,  $0 < r < 1$  in relative refractory state, and  
618  $r = 0$  otherwise (e.g., figure 2.c). The dual parameter  $1 - r$  may be used as a measure of  
619 “excitability” of a neuron. Let  $N(x, t)$  be the number of spikes per unit of time and volume,  
620 (it has the dimension of  $t^{-1}$ ) normalized by  $\rho$  (spike trains induced by strong and longer last-  
621 ing stimuli are treated here as single spikes; e.g., figure 2.b). We will refer to this quantity  
622 simply as “firing rate”. Then, the refractoriness of the neural population may be written as  
623  $\int_{-\infty}^t N(x, s)r(t-s)ds$ , therefore the population excitability  $a(x, t)$ , the fraction of neuron pop-  
624 ulation not in the absolute refractory state, is

$$a(x, t) = 1 - \int_{-\infty}^t N(x, T)r(t-T)dT. \quad (1)$$

625 If the average energy captured by the neural field  $\epsilon$  from a single spike is known, then  $N$  fully  
626 characterizes the internal kinetic energy exchange of the neural field.

627 Therefore, aside from variables that characterize the physiological properties of the network,  
628 the dynamical variables that describe the evolution of the neural field activity are the internal  
629 kinetic energy  $u(x, t)$ , the population excitability  $a(x, t)$  (state variables), and the firing rate  
630  $N(x, t)$  (process variable).

631 The processes governing the rate of change of the internal kinetic energy  $u$  are: 1) the incom-  
632 ing flux of depolarizing inputs coming through synapses; 2) the post-spike collapse of kinetic  
633 energy of the activated neurons, and 3) the natural tendency of the internal kinetic energy  
634 to decay due to microscopic dissipative processes (sodium-potassium ion pumping that re-  
635 stores the electrochemical gradient). The energy balance equation for the  $\alpha$ -type neurons is  
636 therefore

$$\frac{\partial u^\alpha}{\partial t} = \frac{a^\alpha F^\alpha}{\rho^\alpha} - N^\alpha U^\alpha - c^\alpha u^\alpha. \quad (2)$$

637 The first term in the right-hand side of equation 2 states that the contribution of the mean  
638 flux of energy  $F/\rho$  incoming through synapses to a neuron depends on the mean neuron ex-  
639 citability (e.g., if  $a = 1$  all neurons  $\rho$  in the element of volume are excitable, the entire flux  
640 is absorbed). The input flux comes from connected neurons, and depends on the connection  
641 configuration, therefore it may be written in the general form

$$F^\alpha(x, t) = \sum_{\beta} \epsilon^{\beta \rightarrow \alpha} \int^t dT \int dX \rho^\beta(X) N^\beta(X, T) w^{\beta \rightarrow \alpha}(X, x, t - T) + Q^\alpha(x, t), \quad (3)$$

<sup>8</sup>The term volume is used in the general sense of measure, e.g., area for a two-dimensional network.

642 where  $\epsilon^{\beta \rightarrow \alpha}$  is the average amount of energy released by a single spike from type- $\beta$  neurons,  
 643 as received by type- $\alpha$  neurons;  $Q^\alpha$  is the energy flux arriving at  $\alpha$ -type neurons; and  $\beta$  should  
 644 be regarded as a variable that covers all neuron types, such that  $\sum_\beta$  is a summation over all  
 645 types of neurons, including  $\alpha$ -type ones. The spatial integration is carried over the spatial  
 646 domain directly connected to the element of volume at  $x$ . The function  $w^{\beta \rightarrow \alpha}$  is a weighting  
 647 function that depends on the distribution of connections and axonal delays (see the appendix  
 648 for the discussion).

649 The second term represents the post-spike loss of internal kinetic energy (figure 2). As dis-  
 650 cussed above, in the powder-keg paradigm the internal energy of a spiking neuron is set to  
 651 zero, therefore, the process of releasing the potential energy  $N$  spikes annihilates  $N(x, t)U$  of  
 652 the mean internal kinetic energy.

653 The third term describes the natural tendency of the kinetic energy to collapse to the zero-  
 654 energy resting level in the absence of stimulus. Here, again we ignore the possible complexi-  
 655 ties of the decay-rate relation to mean energy, and assume that a constant decay rate  $c$  (per-  
 656 haps to be refined at a later time) captures the essential character of the dynamics.

657 As discussed in more details in appendix A, we expect the probability of spiking to increase  
 658 with higher depolarization (higher temperature). Therefore, the firing rate  $N$  should depend  
 659 on the details of the internal-energy distribution over the neural population, i.e., on the mean  
 660 internal kinetic energy  $u$  and higher moments therefore on all the moments of internal kinetic  
 661 energy distribution), i.e.,

$$N = G(u, \text{fluctuations of } u). \quad (4)$$

662 Because we are interested in this study in the leading order behavior of the system, in the ab-  
 663 sence of further guidance, and pending future refinements, we make the simplifying assump-  
 664 tion that the distribution characterized primarily by its mean, and that the contributions of  
 665 the fluctuations of the mean are not significant and may be neglected. Therefore, we replace  
 666 for now equation 4 with the simple form

$$N = G(u). \quad (5)$$

667 Collecting all above equations, one obtains the system

$$\frac{\partial u^\alpha}{\partial t} = \frac{a^\alpha}{\rho^\alpha} F^\alpha - N^\alpha U - c u^\alpha, \quad (6a)$$

$$F^\alpha = \sum_\beta \epsilon^{\beta \rightarrow \alpha} \int^t dT \int dX \rho^\beta(X) N^\beta(X, T) w^{\beta \rightarrow \alpha}(X, x, t - T) dX dT + Q^\alpha(x, t), \quad (6b)$$

$$a^\alpha = 1 - \int_{-\infty}^t N^\alpha(x, T) r^\alpha(t - T) dT, \quad (6c)$$

$$N^\alpha = G(u^\alpha). \quad (6d)$$

668 Equations 6 are the governing equations for the powder-keg thermodynamic paradigm of a  
 669 neural-field continuum comprising several types of neurons. These equations are general,  
 670 both in the sense that contain expression and parameters yet to be specified (e.g., equation  
 671 6d) and in the sense that described a wide variety of processes other than collective action  
 672 defined as a perturbation of the background state. Equations 6 are complicated nonlinear  
 673 integro-differential equations that are extremely difficult to interpret and solve in original  
 674 form. They involve both a number of parameters (e.g., the decay rate  $c$ ) and functional de-  
 675 pendencies (e.g., the activation function  $G$ ) whose values and forms are not entirely clear or



676 known, and complicated nonlinear terms ( $Fa$  and  $G(u)$ ) that affect significantly the evolution  
677 of the system. The discussion below focuses on the investigation of the linear properties of  
678 the system.

## 679 5. THE RELATIONSHIP BETWEEN THE POWDER-KEG MODEL 6A-6D AND THE WC/A CLASS OF 680 MODELS

681 We discuss below the relationship between the powder-keg model given by equations 6 and  
682 current key thermodynamic models: the class of models based on the Wilson and Cowan  
683 [1972b] formulation (the WC class), and the models based on the Amari [1977] model. These  
684 models are fundamental in the sense that, while significant efforts have been dedicated to im-  
685 proving the models, more recent work [e.g., Jirsa and Haken, 1996, Wright and Liley, 1995b,  
686 Jirsa and Haken, 1997, Robinson et al., 1997] is largely focused on refining the equations and  
687 may be viewed as variations of these two fundamental formulations, rather than a reexamin-  
688 ing their foundation.

689 **The Wilson and Cowan [1972b] class.** The thermodynamic model 6 represents a general-  
690 ization of the WC class of models, similar in functionality, if not carrying exactly the same in  
691 meaning. The recipe for deriving the WC equations from system 6 is simple enough: pick a  
692 suitable form for the window  $w^{\beta \rightarrow \alpha}$ , integrate in time the flux  $F$  (equation 6b), substitute into  
693 the kinetic energy balance equation 6a and integrate it to obtain  $u(F)$ , and finally, substituting  
694 into equation 6d, obtain the firing rate as a function of the incoming energy flux.

695 We summarize this procedure following the choices of Wilson and Cowan [1972b], Cowan  
696 et al. [2016]. For simplicity, we assume the field comprises a single type of neurons, therefore  
697 we omit the type superscripts.

698 The obstacles in carrying it out reflect the differences between the two formulations. If one  
699 assumes that delays are constants and independent of axonal range, then the weighting func-  
700 tion  $w$  can be factorized into spatial and temporal components

$$w(X - x, t - T) = w(X - x)\delta(t - T - \tau_{WC}), \quad (7)$$

701 where  $\tau_{WC}$  is the time increment used in the discrete Wilson-Cowan equation. Equations 6a-  
702 6b become

$$\frac{\partial u}{\partial t} = \frac{a}{\rho}F - NU - cu, \quad (8)$$

$$F(x, t) = \epsilon \int^t dT \delta(t - T - \tau_{WC}) \int dX \rho(X) N(X, T) w(X - x) + Q(x, t). \quad (9)$$

703 The time integration may be carried out in equation 9 to yield

$$F(t) = \epsilon \int dX \rho(X) N(X, t - \tau_{WC}) w(X - x) dX + Q(x, t). \quad (10)$$

704 The main obstacle in this procedure becomes apparent when attempting to integrate in time  
705 equation 8. The WC formulation has no term equivalent to the  $NU$  term in equation 8; in  
706 general, the evolution equations for  $u$  and  $a$  obviously depend on  $N$  (see also equation 1)  
707 and will create a recursive algebraic dependency between  $N$  and  $u$  when substituting  $u$  in  
708 the equation 6d. Obviously, the evolution equations for  $u$  and  $N$  are coupled (see discussion

below). We will therefore ignore the  $NU$  term and set  $a = 1$  for now. Doing this allows for integrating the balance equation of the kinetic energy 8 to

$$u(x, t) = \frac{1}{\rho(x)} \int_{-\infty}^t dT e^{c(T-t)} \epsilon \int \rho(X) N(X, T - \tau_{WC}) w(X - x) dX \quad (11)$$

or, equivalently

$$u(x, t + \tau_{WC}) = \frac{1}{\rho(x)} \int_{-\infty}^t dT e^{c(T-t)} \epsilon \int \rho(X) N(X, T) w(X - x). \quad (12)$$

Substituting into equation 6d retrieves the functional form of the WC model, e.g., equations 7-9 in Cowan et al. [2016] (if the factors involving refractoriness and decay are ignored)

$$N(x, t + \tau_{WC}) = G \left( \frac{1}{\rho(x)} \int_{-\infty}^t dT e^{c(T-t)} \epsilon \int_{D(x)} \rho(X) N(X, T) w(X - x) dX \right). \quad (13)$$

This brief derivation highlights the similarities and the differences between the model presented here and the basic Wilson-Cowan equations. Leaving aside details such as the discrete form of the latter, which of course sacrifices subgrid (cell) scales, the central difference is the description of the state of the neural field. WC models are based on the assumption that the output energy flux (firing rate) may be expressed directly as a function of the input fluxes. This assumption holds only if the flux balance does not depend on the state of the system. It is easy to see, however, that for a given fixed input flux may result in evolution trends as different as stable equilibrium (constant temperature and firing rate), catastrophic growth, or decay to zero, depending on the initial temperature of the system. One could heuristically argue that this might be the case of systems whose internal “physics” are invariant to evolution. It should be clear, however, (see figure 3) that this cannot apply to physical systems in the vicinity of a threshold-type phase transition point, and therefore to “hot” (high internal kinetic energy) neural fields, where firing depends significantly the fluctuations of the system energy. This suggests that the applicability of WC class of models is by and large limited to “cold” neural fields whose mean internal kinetic energy (temperature) is far from the firing threshold.

The absence of a state description the WC class of models may be corrected, but corrections are also limited in scope and lead to awkward behavior. For example, because the natural decay of the system toward zero temperature (term  $-cu$  equation 6a) cannot be introduced in a natural way, it has to be parameterized by a decay rate in the relationship between fluxes.

**Amari [1977] model.** An alternative fundamental formulation that attempts to correct for the lack of a state variable is due to Amari [e.g., Amari, 1977]. The model is very similar to our equations 6, with a few significant differences. Amari introduced two new parameters, the averaged membrane potential and an excitability, and defined activation as a Heaviside function (see figure 2). The averaged membrane potential plays the role of the state variable, while excitability is assumed to be constant in time. Retrieving Amari’s model from equations 6 is straightforward. If the term  $NU$  is ignored and excitability parameter is constant, inserting the flux term  $F$  into the balance equation for  $u$  yields equation 1 in Amari [1977]

$$\frac{\partial u}{\partial t} = \frac{\epsilon}{\rho(x)} \int dT \int_{D(x)} dX \rho(X) N(X, T) w(X, x, t - T) dX dT - cu + \frac{1}{\rho(x)} Q(x, t) \quad (14)$$

742 This is exactly a same functional form as given in Amari [1977], equation (1), but with a dif-  
743 ferent resting state. Treating the excitability as a constant means that Amari’s model is in fact  
744 a variant of the WC class of model. This suggests that the Amari [1977] model has some (but  
745 not all) of the same limitations as the WC models. The “mean membrane potential” is not  
746 defined in the paper, and in general is hard to define when the neuron spikes. The absence  
747 of the  $NU$  term implies that the Amari [1977] model does not take into account the fact that  
748 spikes reset the internal kinetic energy of the neuron to zero, thus it overestimates growth  
749 and underestimates decay. A complete description of the state of the neural field requires  
750 two state variables: internal kinetic energy  $u$  and excitability  $a$ . Ignoring the time evolution  
751 of one of them ( $a$ ) is a strong dynamical restriction. This is a drawback similar to the WC  
752 representation, albeit only partial, since  $u$  is used. However, the dimensionality of the phase  
753 space of the system is essentially halved.

754

## 6. SIMPLIFICATIONS

755 The full model in Equation 6 is originally in form of integral differential equations, which is  
756 convenient for numerical simulations but poses difficulties on theoretical analysis. Under  
757 some general simplifications, we want to find a set of coupled differential equations that rep-  
758 resent the dynamics of the original model.

759 For simplicity, we assume the neural field is one-dimensional and homogeneous, with neg-  
760 ligible biological (axonal and synaptic) delays. We use the mean axonal range and the mean  
761 equivalent refractory time as units of space and time.

762 Then, the weighting function  $w$  in equation 6b is only a function of distance,  $w(X, x) = w(|x - X|)$ ,  
763 and substituting into equation 6b and expanding the integral formally into a Taylor series ob-  
764 tains

$$F^\alpha = Q^\alpha + \sum_{\beta} \epsilon^{\beta \rightarrow \alpha} \rho^\beta \sum_{j=0}^{\infty} b_{2j} \frac{\partial^{2j} N^\beta}{\partial x^{2j}}, \quad (15)$$

765 where we assume that the series is either summable, or should be interpreted as an asymp-  
766 totic series, and the coefficients

$$b_{2j} = \frac{1}{(2j)!} \int_{-\infty}^{+\infty} w(|X|) X^{2j} dX, \quad (16)$$

767 are even moments of the window  $w$ . In connections are uniformly distributed, i.e., the number  
768 of connections to point  $x$  is given by a rectangular distribution  $w(X, x) = 0.5$  if  $|X - x| \leq 1$ ,  
769 and zero otherwise, the constants acquire the simple form  $b_{2j} = \frac{1}{(2j+1)!}$ . Qualitatively, higher  
770 order terms in 15 are smaller, but, as discussed in section 7, whether they are significant or  
771 not depends on the physical context.

772 An accurate representation of the mesoscopic refractoriness parameter is not available, but  
773 some possible simple forms are straightforward. If we assume that the mean neuron is ex-  
774 cluded from the energy exchange process in the absolute refractory period and opens slowly  
775 post-spike, the evolution of refractoriness resemble the blue line in figure 2, bottom panel.

776 The standard historical convention [Cowan et al., 2016] ignores the relative refractory period  
777 and models the absolute refractory period as a rectangular distribution. The relative refrac-  
778 tory state, however, represents a smooth transition between absolute refractoriness and full

779 excitability: ignoring it completely is not realistic, but neither is treating it in its entirety as  
780 an absolute refractory state. It is then convenient to define the refractoriness function  $r(t)$   
781 as an (arbitrary) decaying function with a characteristic time constant, the equivalent refrac-  
782 tory time  $\tau$ . Setting  $t = 0$  at the beginning of the spike, the equivalent refractory time can  
783 be defined as  $\tau = -\int_0^{+\infty} t dr$  (because  $0 \leq r \leq 1$ , the “excitability” measure  $1 - r$  can be in-  
784 terpreted as a cumulative distribution function with mean refractory time  $\tau$  as defined). The  
785 exact value of  $\tau$  is somewhat arbitrary and should be determined from observational data.  
786 Throughout the discussion below we use the equivalent refractory time  $\tau$  as the unit of time.  
787 The Heaviside definition of refractoriness is then  $r = H(\tau - t)$ , where  $H$  is the Heaviside distri-  
788 bution (yellow curve in figure 2, bottom panel). Substituting into equation 6c and expanding  
789 in Taylor series on the integral over refractoriness obtains for the excitability parameter  $a$  the  
790 formal equation

$$1 - a = \sum_{j=0}^{\infty} d_j \frac{\partial^j N(x, t)}{\partial t^j}. \quad (17)$$

791 where, as above, we assume that the series symbol makes sense in some mathematical inter-  
792 pretation, and the integration constants  $d_j$  are

$$d_j = \frac{(-1)^{j+1}}{(j+1)!} \tau^j. \quad (18)$$

793 For reasons that will be discussed in detail in section 7, we propose here an alternative formu-  
794 lation, that models both the absolute and the relative period as an exponential decay  $r(T, t) =$   
795  $e^{-\frac{(t-T)}{\tau}}$  (red line in figure 2, bottom panel). Substituting into equation 6c and differentiating  
796 to time obtains for  $a$  the equation

$$\frac{\partial a}{\partial t} = \frac{1 - a}{\tau} - N. \quad (19)$$

797 Below, we use this form as a substitute for equation 6c.

798 In order to begin solving the governing equations, the functional dependency of the firing rate  
799 on the internal energy  $N(u)$ , also called the “activation function”, needs to be stated explic-  
800 itly. However, obtaining an physiologically accurate form of the activation function is difficult  
801 and beyond the scope of this study. The general concept of activation function dates back to  
802 Beurle and Matthews [1956] and was improved by Wilson and Cowan [1972b], who reasoned  
803 that, if all neurons in the element of area have the same mean depolarization, the firing rate  
804 is proportional the the cumulative distribution function of threshold values. Therefore, the  
805 functional form of the activation function is similar to a sigmoid. The sigmoid shape, how-  
806 ever, is not adequate in our model for several reasons. In a randomly connected neural field  
807 the instantaneous value of the internal kinetic energy of individual neurons (blue curve in  
808 figure 2) is random (randomness of microscopic activity is a basic assumption of mesoscopic  
809 activity). While the sigmoid could be remapped to cover only the domain of our definition  
810 of the internal kinetic energy ( $0 \leq u \leq U$ ), the goal of our model is to resolve mesoscopic  
811 time scales. The state of a neuron continuously bounces around in the interval  $[0, U]$ , i.e., any  
812 neuron may enter refractory states and refuse to fire while accumulating the potential energy  
813 necessary for firing again. Using the sigmoid functional form in this description would imply  
814 that the neuron sub-population with zero internal energy never fires, while sub-population  
815 with  $u = U$  fires continuously.

816 To proceed, some assumptions need to be made (see appendix A for a discussion of the activa-  
 817 tion function). One can argue that if  $u = U$ , the firing rate is infinite; in the extreme opposite  
 818 case, if  $u = 0$ , most (read all but a zero measure) neurons are at resting level, thus the fir-  
 819 ing rate is 0. Assuming that the activation function is monotonically increasing, a plausible  
 820 functional form consistent with these constraints is

$$N(u) = A \left( \frac{1}{U - u} - 1 \right) \quad (20)$$

821 where the constant  $A$  is a measure of the intensity of endogenous membrane potential fluc-  
 822 tuations (“fluctuation strength” for short). Equation 20 may be readily inverted to give

$$u(N) = U - \frac{A}{N + A}. \quad (21)$$

823 Finally, we will assume that the neural field is isotropic. This assumption implies that all  
 824 odd spatial derivatives cancel, which simplifies the equations considerably, but also imposes  
 825 a strong constraint that has at least two significant consequences: it enhances the diffusive  
 826 character of the system, and it restricts the class of admissible solutions of equations 6, af-  
 827 fecting in particular the wave type of solutions. Despite these drawbacks, we consider this  
 828 simplification relevant for mesoscopic scales small enough to not be strongly affected, say, by  
 829 boundary conditions (which are not discussed here). Nonetheless, we caution the reader that  
 830 the discussion below should be regarded as relevant only for the subset of solutions satisfying  
 831 this constraint, and not for the full family of solutions of the system of governing equations.

## 832 7. LINEAR ANALYSIS: SINGLE-TYPE (EXCITATORY) NEURAL FIELDS

833 The first step in pursuing the idea that mesoscopic collective action represents perturbative  
 834 states is an investigation into equilibrium states and their stability. In this section we examine  
 835 the linear properties of neural fields composed of a single neuron type (say, pyramidal cells).

836 Below, the neural field is assumed to be under a steady, spatially uniform input, i.e.,  $\frac{\partial Q}{\partial t} = 0$   
 837 and  $\nabla Q = 0$ . Under these conditions, the governing equations 6, written for a single-type  
 838 neural field, are

$$\frac{\partial u}{\partial t} = \frac{F}{\rho} - NU - cu, \quad (22a)$$

$$\frac{\partial a}{\partial t} = \frac{1 - a}{\tau} - N, \quad (22b)$$

$$F = Q + \epsilon \rho \left( N + \sum_{j=1}^{\infty} b_{2j} \frac{\partial^{2j} N^{\beta}}{\partial x^{2j}} \right) \quad (22c)$$

839 . To describe perturbations around stable equilibrium states that may vary in space, in  
 840 equation 22c the energy flux was expressed the form 15. Note that, in agreements with the  
 841 isotropy assumptions, only even orders of the spatial expansion are retained. In the discus-  
 842 sion of the dispersion relation below we will prefer using for  $a$  equation 17, but the resulting  
 843 equilibrium states are the same for both approaches.

844 Let  $\delta \ll 1$  be a small parameter that measures the magnitude of the departure from equilib-  
 845 rium states, and expand the state variables in the asymptotic series

$$u = u_0 + \delta u_1 + O(\delta^2); \quad a = a_0 + \delta a_1 + O(\delta^2), \quad (23)$$



846 where the zero-subscripts denote the equilibrium states. For consistency, process variables  
847  $N(u, a)$  and  $F(u, a)$  are also expanded in asymptotic series, for example,

$$N = N_0 + \delta N_1 + O(\delta^2); N_0 = N(u_0); N_1 = \frac{\partial N}{\partial u} u_1, \quad (24)$$

$$F = F_0 + \delta F_1 + O(\delta^2); F_0 = F(N_0); F_1 = \frac{dF}{dN} N_1, \quad (25)$$

848 where  $F$  is a functional of  $N$ , and  $\frac{dF}{dN}$  is the variational derivative.

849 Equilibrium states are defined here by the condition that the internal kinetic energy of the  
850 system is stationary and constant in space,  $\frac{\partial}{\partial t}(u, a) = (0, 0)$  and  $\nabla(u, a) = (0, 0)$ , therefore,  
851 the energy flux and firing rate at equilibrium are homogeneous, e.g.,  $\frac{\partial^2 N_0}{\partial x^{2j}} = 0$ . Substituting  
852 expansions into the governing equations 23- 25 into the governing equations 7 and separating  
853 the powers of  $\delta$  obtains the standard hierarchy of systems for each power of  $\delta$ .

854 **7.1. Equilibrium states.** At  $O(\delta^0)$ , the equations for the equilibrium state are

$$\frac{1 - \tau N_0}{\rho} (Q + \epsilon \rho N_0) = N_0 U + c u_0, \text{ or } \mathcal{F}_{\text{in}} = \mathcal{F}_{\text{out}} \quad (26a)$$

855 where

$$\mathcal{F}_{\text{in}} = \left( \frac{Q}{\rho} + \epsilon N_0 \right) (1 - N_0 \tau), \quad (26b)$$

$$\mathcal{F}_{\text{out}} = N_0 U + c u_0. \quad (26c)$$

856 with  $\mathcal{F}_{\text{in}}$  and  $\mathcal{F}_{\text{out}}$  the internal kinetic energy gains and losses, respectively. Equation 26 states  
857 that equilibrium states are achieved for firing rates  $N_0$  such that  $\mathcal{F}_{\text{in}}(N_0) = \mathcal{F}_{\text{out}}(N_0)$ . Sub-  
858 stituting the expressions 26b-26c into 26a obtains the cubic algebraic equation

$$p_3 N^3 + p_2 N^2 + p_1 N + p_0 = 0, \quad (27)$$

859 with the coefficients

$$p_0 = A \left( \frac{Q}{\rho} - cU + c \right), p_1 = \frac{Q}{\rho} (1 - A) \tau + \epsilon A - UA - cU$$

$$p_2 = \epsilon - \frac{Q}{\rho} \tau - \epsilon A \tau - U, p_3 = -\epsilon \tau. \quad (28)$$

860 Equilibrium states correspond to the roots of equation 27. Equation 27 may have one or three  
861 real solutions corresponding to firing rates at equilibrium points, that depend on the config-  
862 uration of the network. To illustrate the behavior of the system, we distinguish between two  
863 types of parameters: static parameters that characterize the physiological properties of the  
864 fields (neuron density  $\rho$ , decay rate  $c$ , threshold internal kinetic energy  $U$ , equivalent refrac-  
865 tory time  $\tau$ ) and parameters that control the dynamics: connection strength (energy recap-  
866 tured from a single spike)  $\epsilon$ , and the endogenous fluctuation constant  $A$ . The description of  
867 equilibrium types shown in figure 4 is given for static parameters  $Q/\rho = 0.1$  and  $c = 0.5$ .

868 Single equilibrium-point configurations may correspond to different levels of firing rates  $N$ , as  
869 shown in figure 4.a. The dependency of the energy losses and gains (equation 26) is shown in  
870 figure 4.c. For single equilibrium points, low values of  $A$  and  $\epsilon$  induce low firing rates (lower-  
871 left corner of figure 4.a), with field dynamics controlled by the external stimulation, and level

872 of firing rate roughly proportional to the external-input level  $\frac{Q}{\rho}$ . At higher values of  $A$  and  $\epsilon$   
873 , the equilibrium state is still stable, but is achieved at increasing firing rates  $N_0$  figure 4.a,  
874 (upper-right corner). As  $N_0$  increases, higher order terms in equations 26 play and increas-  
875 ingly important role, the relationship between  $N_0$  and external input  $Q$  weakens, and the  
876 stability of the equilibrium point decreases. Qualitatively speaking, as local dynamics around  
877 the fixed point gradually become unstable as  $N_0$  increases, but the nonlinearity introduced by  
878 refractory period (term  $N\tau$  in equation 26b) insures that the fixed points are globally stable.

879 Triple equilibrium states are realized for low membrane fluctuations  $A$  and strong connec-  
880 tivity  $\epsilon$  (figure 4.a). A typical configuration of the balance of  $\mathcal{F}_{in/out}$  as a function of the firing  
881 rate  $N$  is shown in figure 4.d, with two stable points separated by a unstable one. Low val-  
882 ues of  $A$  insure that low firing rates do not induce large excitability through by endogenous  
883 activity; strong connectivity insures that excitability is self-sustained at high firing rates. If  
884 stimulation or inhibition force large-enough changes in the firing rate, switching between the  
885 two stable states is possible. Because of the extreme values (low for  $A$ , and high for  $\epsilon$ ) we  
886 expect these cases to be rare and perhaps unrealistic, although we could not find any clear  
887 guidance in the literature about this.

888 Our analysis suggests that collective activity of neural populations is naturally bounded, with  
889 deviations from equilibrium state having the tendency to diffuse and average toward equilib-  
890 rium. In fact, one might say that that “most” solutions are just exponential decay. Previous  
891 studies of single-type neural fields largely report only exponential decay under homogeneous  
892 perturbations, as a result, previous derivations of field equations treated the decay property  
893 as fundamental [Wilson and Cowan, 1972b, Amari, 1977]. Figure 4.b provides a qualitative  
894 representation of the extent oscillatory domain. In the  $(N, A)$  plane the oscillatory behavior is  
895 confined to relatively small domain, the white area in the neighborhood of zero-growth curve  
896 (purple). To the left (low connection strength  $\epsilon$ ) dissipation dominates (equals the frequency  
897 along the blue curve), and to the left perturbations become increasingly unstable. In a densely  
898 firing networks [e.g., Pinto et al., 2005, Trevelyan et al., 2007], refractoriness begins to play a  
899 role: if  $N$  is large,  $a$  deviates from 1 to a smaller value, which activates the nonlinear term  $\frac{F}{\rho}a$   
900 in equations 7. Because refractoriness is cumulative over time (see integral in equation 6c)  
901 it introduces in the dynamics a hysteresis effect [Cowan et al., 2016]. Due to the hysteresis,  
902 a population reaches its equilibrium point from a deviated state would not just stop at the  
903 equilibrium, but the delayed effect of refractoriness changes excitability of the population so  
904 that the static equilibrium point is not dynamically stable. As a consequence, firing rate  $N$  is  
905 coupled to the population excitability  $a$  with some phase lag and the interplay between the  
906 two quantities generates a oscillatory behavior. Our model provides a mathematical formu-  
907 lation of this mechanism. It is worth noting that the refractory oscillatory patterns only exist  
908 in densely firing network in which refractoriness matters, that is, exist only around upper  
909 equilibrium states (figure 4.b). In comparison, dynamical patterns around lower equilibrium  
910 states only show rapid collapse because modulation from refractoriness is negligible during  
911 low firing rate.

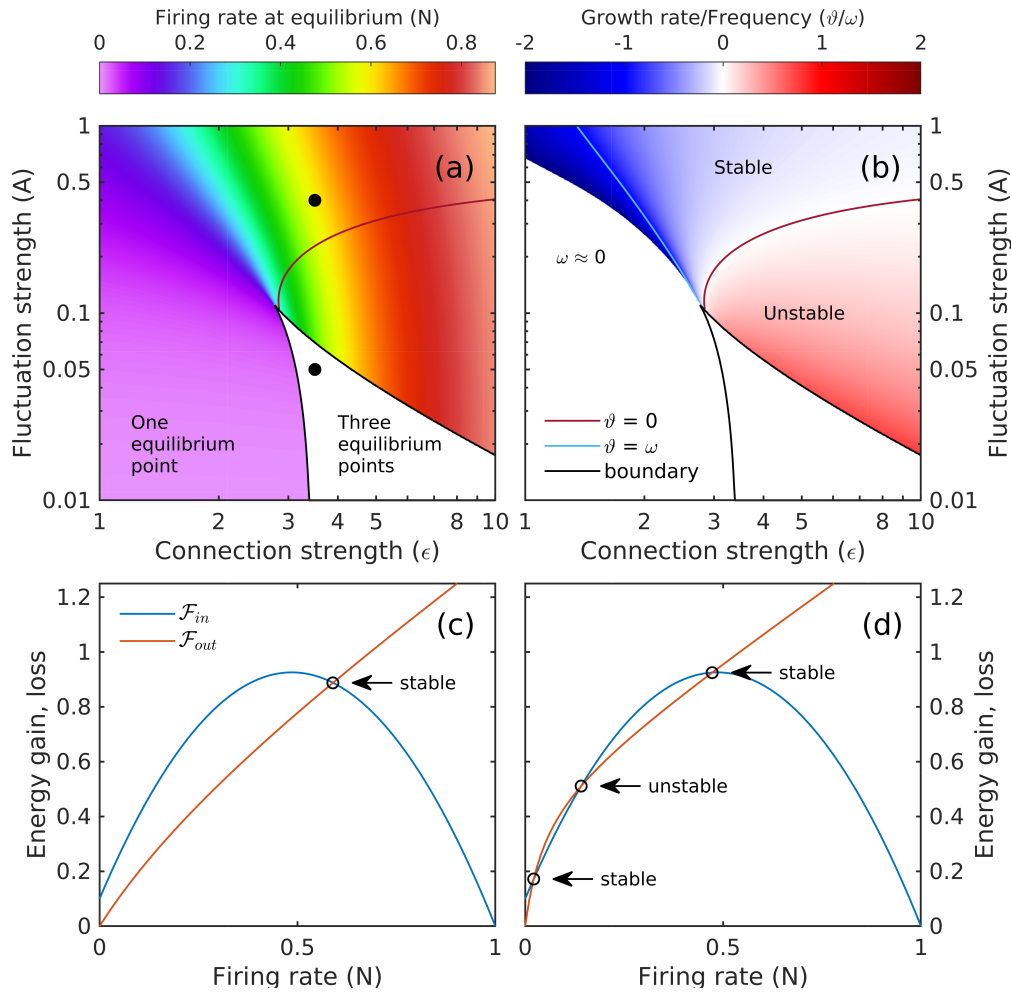

FIGURE 4. Equilibrium states under homogeneous forcing. a) Firing rate  $N$  at equilibrium states for cases with only 1 equilibrium state. b) The dependency of the ratio  $\vartheta/\omega$  at equilibrium (for states with one equilibrium point) on connection strength  $\epsilon$  and fluctuation strengths  $A$ . Counterclockwise around the cusp of the domain of three equilibrium points: the frequency growth from zero to its maximum values, while the “growth” rate increases from negative values (dissipation, stable equilibrium) to positive values (true growth, unstable equilibrium). The dissipation rate equals the frequency along the blue curve, and is zero along the purple curve. c-d) Dependency of energy gains and losses ( $\mathcal{F}_{in}$  and  $\mathcal{F}_{out}$ ) on the firing rate  $N$ . Equilibrium states (with firing rates  $N_0$ ) are realized at the intersection of the curves, i.e.,  $\mathcal{F}_{in}(N_0) = \mathcal{F}_{out}(N_0)$ . In both equilibrium cases shown (dots on panel a) parameters  $Q/\rho = 0.1$  and  $c = 1.0$ , while the strength of endogenous membrane fluctuations  $A$  and connectivity  $\epsilon$  are varied. c)  $A = 0.4$ ,  $\epsilon = 3.5$ ; d)  $A = 0.05$ ,  $\epsilon = 3.5$ .

912 **7.2. Perturbations of equilibrium.** At  $O(\delta^1)$ , the system of equations for the leading order  
 913 perturbation are

$$\frac{\partial u_1}{\partial t} = \frac{a_1}{\rho} (Q + \epsilon \rho N_0) + a_0 \epsilon \sum_{j=0}^{\infty} b_{2j} \frac{\partial^{2j} N_1^\beta}{\partial x^{2j}} - N_1 U - c u_1, \quad (29a)$$

$$\frac{\partial a_1}{\partial t} = -\frac{a_1}{\tau} - N_1, \text{ or, alternatively, } a_1 = -\sum_{j=0}^{\infty} d_j \frac{\partial^j N_1}{\partial t^j}. \quad (29b)$$

914 where the alternative form for  $a_1$  derives from equation 17. Equations 29 may be used to  
 915 examine the stability of equilibrium states under homogeneous perturbations, or to study  
 916 the dynamics of inhomogeneous perturbations (collective action).

917 7.2.1. *Homogeneous perturbations.* For homogeneous perturbations  $\frac{\partial^{2j} N_1^\beta}{\partial x^{2j}} = 0$ , and equation  
 918 29 becomes

$$\frac{1}{s_0} \frac{dN_1}{dt} = \frac{a_1}{\rho} (Q + \epsilon \rho N_0) + a_0 \epsilon b_0 N_1 - N_1 U - \frac{c}{s_0} N_1, \quad (30a)$$

$$\frac{\partial a_1}{\partial t} = -\frac{a_1}{\tau} - N_1 \quad (30b)$$

919 where  $s_0 = \left(\frac{dN}{du}\right)_0$ . Substituting into equation 30 the standard solution  $a = e^{\sigma t}$ , where  $\sigma \in \mathbb{C}$ ,  
 920 with the real part  $\vartheta = \Re\{\sigma\}$  representing the growth (decay) rate, and the imaginary part  
 921  $\omega = \Im\{\sigma\}$  representing the frequency of oscillation, obtains

$$\sigma = \frac{1}{2} \left( -b \pm \sqrt{\Delta} \right), \quad \Delta = b^2 - 4 \frac{d}{dN_0} (\mathcal{F}_{\text{in}} - \mathcal{F}_{\text{out}}), \quad (31a)$$

$$b = \frac{1}{\tau} + s_0 U + c - \frac{1}{\tau} s_0 a_0 \epsilon, \quad (31b)$$

$$\frac{d}{dN_0} (\mathcal{F}_{\text{in}} - \mathcal{F}_{\text{out}}) = s_0 \frac{F_0}{\rho} + \frac{1}{\tau} s_0 U + \frac{1}{\tau} c - \frac{1}{\tau} s_0 a_0 \epsilon. \quad (31c)$$

922 Pure growth(decay) behavior occurs if  $\Delta \geq 0$  in equation 31a. Oscillatory perturbations may  
 923 occur if  $\Delta < 0$ , i.e.

$$\frac{d}{dN_0} (\mathcal{F}_{\text{in}} - \mathcal{F}_{\text{out}}) > \frac{1}{4} b^2, \quad (32)$$

924 (near unstable equilibrium points - figure 4) in other words, if energy gains grow with  $N_0$   
 925 faster than losses by a margin larger than  $\frac{1}{4} b^2$ . Oscillatory behavior may show growth or decay  
 926 trends depending on the sign of  $b$ . If  $b > 0$ , the oscillation decays as shown in figure 5.a-b for a  
 927 case corresponding to figure 4.c). If the decay rate  $b$  is large enough so that the inequality 32  
 928 is not possible, the dynamics is a monotonic collapse towards equilibrium (figure 5.e-f). The  
 929 growth shown in figure 5.c-d corresponds to conditions near an unstable equilibrium point  
 930 (figure 4.d), such that  $b < 0$  and energy gains are larger than losses. As the system goes away  
 931 from the equilibrium point growth rate decreases, and the trajectory of the system stabilizes  
 932 along a limit cycle.

933 It is important to observe that refractoriness is the fundamental mechanism that allows for  
 934 oscillatory patterns shown in the phase portraits of figure 5 arise: ignoring refractoriness is  
 935 equivalent to setting  $a \equiv 1$  (see equation 1) in which case equation 29 becomes a first order  
 936 differential equation with no oscillatory solutions. We will therefore call these “refractory os-  
 937 cillations”. Refractory oscillations have periods in order  $O(\tau)$ , i.e., several refractory periods  
 938 (e.g., figure 5), corresponding to frequency in the range of 100 Hz - 150 Hz (close to ripple fre-  
 939 quency). When getting into spatially in-homogeneous cases, we will see spatial contribution  
 940 increases slightly on the frequencies.

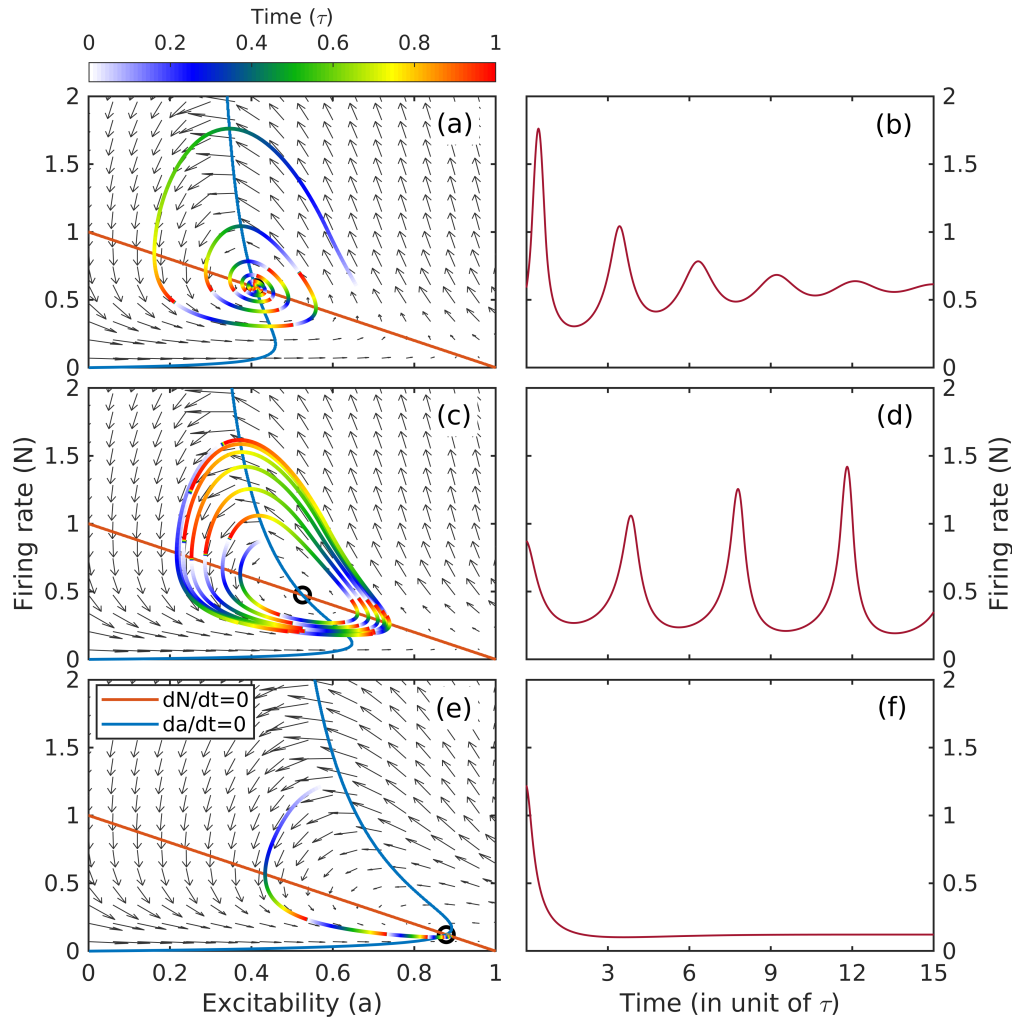

FIGURE 5. Typical oscillatory patterns of excitatory populations, *resulting from integrating the full system of equations*. Left column contains phase portraits of temporal evolution. A trace starting from an arbitrary state is shown for each case, one epoch of color map denotes one equivalent refractory period. a,c,e) Numerically integrated oscillatory patterns of firing rate. b,d,f) Time series of firing rate corresponding the right panels. a,b) Stable spiral,  $b > 0$ , with  $\epsilon = 3.5$ ,  $Q/\rho = 0.1$ ,  $c = 0.5$ ,  $A = 0.4$ ; c,d) Unstable spiral,  $b > 0$ , with  $\epsilon = 2.5$ ,  $Q/\rho = 0.1$ ,  $c = 1.0$ ,  $A = 0.4$ ; e,f) Stable node,  $b < 0$ , with  $\epsilon = 4.0$ ,  $Q/\rho = 0.1$ ,  $c = 1.0$ ,  $A = 0.4$ .

941 **7.3. Inhomogeneous perturbations (collective action).** The analysis presented here is dif-  
 942 ferent if the perturbations have a non-trivial spatial structure, the spatial gradients have to  
 943 be taken into account. For the sake of simplicity, it is convenient to return to Amari's [1977]  
 944 Heaviside formulation for activity (equation 17). We start, therefore, from the alternative



945 form for the  $O(\delta)$  perturbation equation 29, i.e.,

$$\frac{\partial u_1}{\partial t} = \frac{a_1}{\rho} (Q + \epsilon \rho N_0) + a_0 \epsilon \sum_{j=0}^{\infty} b_{2j} \frac{\partial^{2j} N_1^\beta}{\partial x^{2j}} - N_1 U - c u_1, \quad (33a)$$

$$a_1 = - \sum_{j=0}^{\infty} d_j \frac{\partial^j N_1}{\partial t^j}. \quad (33b)$$

946 Equations 33 may be simplified to retain the internal kinetic energy  $u$  as the only independent  
947 variable, which obtains a single partial differential equation

$$\left[ (1 - \tau N_0) \epsilon s_0 - \left( \frac{Q}{\rho} + \epsilon N_0 \right) d_0 s - U s_0 - c \right] u_1 + (1 - N_0) \epsilon s_0 \sum_{j=1}^{\infty} b_{2j} \frac{\partial^{2j} u_1}{\partial x^{2j}} - \left( \frac{Q}{\rho} + \epsilon N_0 \right) s_0 \sum_{j=1}^{\infty} d_j \frac{\partial^j u_1}{\partial t^j} - \frac{\partial u_1}{\partial t} = 0. \quad (34)$$

948 In contrast to the stability analysis in the previous section, we are interested here in identify-  
949 ing conditions favorable to propagating perturbations (waves). Therefore, we seek a solution  
950 in the form  $u_1 \propto e^{i(kx + \sigma t)}$ , where here  $\omega = \Re\{\sigma\}$  is the frequency and  $\Re\{k\}$  is the wave  
951 number, and  $\vartheta = \Im\{\sigma\}$  and  $\Im\{k\}$  are temporal and spatial growth (decay) rates. With the  
952 derivatives given by the simple rules  $\frac{\partial^n}{\partial t^n} = (i\sigma)^n$  and  $\frac{\partial^n}{\partial x^n} = (ik)^n$  one obtains the algebraic  
953 equation

$$\mathcal{G}(k) = \mathcal{H}(\sigma) \quad (35a)$$

954 where the functions  $\mathcal{G}$  and  $\mathcal{H}$  are given by

$$\mathcal{G}(k) = \left[ (1 - \tau N_0) \epsilon s_0 - \left( \frac{Q}{\rho} + \epsilon N_0 \right) d_0 s_0 - U s_0 - c \right] + (1 - N_0) \epsilon s_0 \sum_{j=1}^{\infty} b_{2j} (ik)^{2j} \quad (35b)$$

$$\mathcal{H}(\sigma) = \left( \frac{Q}{\rho} + \epsilon N_0 \right) s_0 \sum_{j=1}^{\infty} d_j (i\sigma)^j + (i\sigma) \quad (35c)$$

955 . For propagating perturbations, equation 35 represents the dispersion relation [Whitham,  
956 2011]. As a consequence of the Taylor expansions (equations 17 and 15) equation 35 contains  
957 an infinite number of terms whose significance over given temporal and spatial scales should  
958 decrease with decreasing orders of magnitude. The significance of the expansion terms for  
959 wave processes may be gauged by evaluating their contribution to the dispersion relation  
960 35 (figure 6). While the overall trend is a monotonic decay with order in the expansion, the  
961 decay rate of terms in the temporal Taylor expansion much slower than that of the spatial  
962 terms. Keeping only the leading order approximation in equation 17, e.g.,  $a \approx (1 - \tau N)$   
963 is too crude to resolve wave patterns. This problem was circumvented here by introducing  
964 the exponential form of the refractoriness based on the equivalent refractory period which  
965 yielded for excitability the form in equation 19. The analysis of orders of magnitude shown  
966 in figure 6 also suggests that, because the spatial terms decay very fast, spatial coupling may

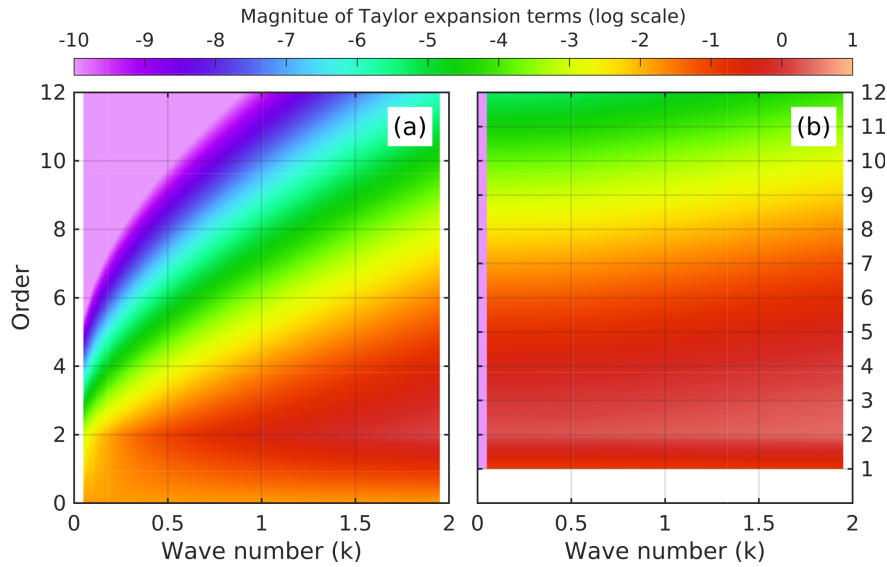

FIGURE 6. Contribution of Taylor expansion terms in the dispersion relation (equations 34 and 35): a) spatial terms (due to the isotropy assumption, only even terms are retained in the spatial expansion); b) temporal terms. This analysis provides a measure of the importance of different order approximations for the dynamics. While spatial terms decay relatively fast, the decay of temporal terms is slow and higher order terms cannot be neglected on any meaningful mesoscopic temporal scales.

967 be regarded as a small modulation of the temporal dynamics of homogeneous perturbations  
 968 (the neural field may be approximated as a network of weakly coupled oscillators).

969 To represent progressive waves, choose  $k \in \mathbb{R}$ , which implies that  $\mathcal{G}(k) \in \mathbb{R}$  ( $ik$  appears at  
 970 even powers), therefore  $\mathcal{H}(\sigma)$  should also be real. A graphic representation of the solutions  
 971 of equations 35 is shown in figure 7a-c. The resulting dispersion relation, plotted in figure  
 972 7.d, covers relatively small scales. If the wave number is  $k = \frac{2\pi}{\lambda}$ , with  $\lambda$  the wave length in  
 973 units of mean axonal range, the range plotted is between approximately 6 and 100 units. The  
 974 dispersion relation  $\omega(k)$  is not monotonic, but it increases overall, in a pattern similar with  
 975 the decay rate, with the phase speed decreasing with  $k$ .

976 Due to their intimate relation with refractory oscillations discussed above for homogeneous  
 977 perturbations, the wave patterns satisfying the dispersion relation 35 should be called “re-  
 978 fractory waves”. The dynamics underlying refractory waves are similar, with propagation  
 979 emerging simply as an effect of spatial coupling. The dispersion relation is monotonically  
 980 increasing at low waves numbers (large wave lengths), and includes as a limiting case homo-  
 981 geneous oscillations (the zero wave number has a non-zero frequency). This indicates that the  
 982 lower bound of refractory-wave frequency is the frequency of refractory oscillations, which  
 983 puts the frequency domain of refractory waves above the range of cortical and hippocampal  
 984 ripple frequencies [Buzsáki, 2015]. The practice of detecting cortex regions with high activity  
 985 by the LFP power in frequency bands associated with ripples [Ray and Maunsell, 2011] seems  
 986 to support our assumption that these kind of oscillations are associated with high firing rates  
 987  $N$ . The behavior of the dispersion relation in the short-wave domain shown in figure 7.d also  
 988 suggests that 1) the frequency band of refractory waves has an upper bound at  $\omega \approx 3$ ; and

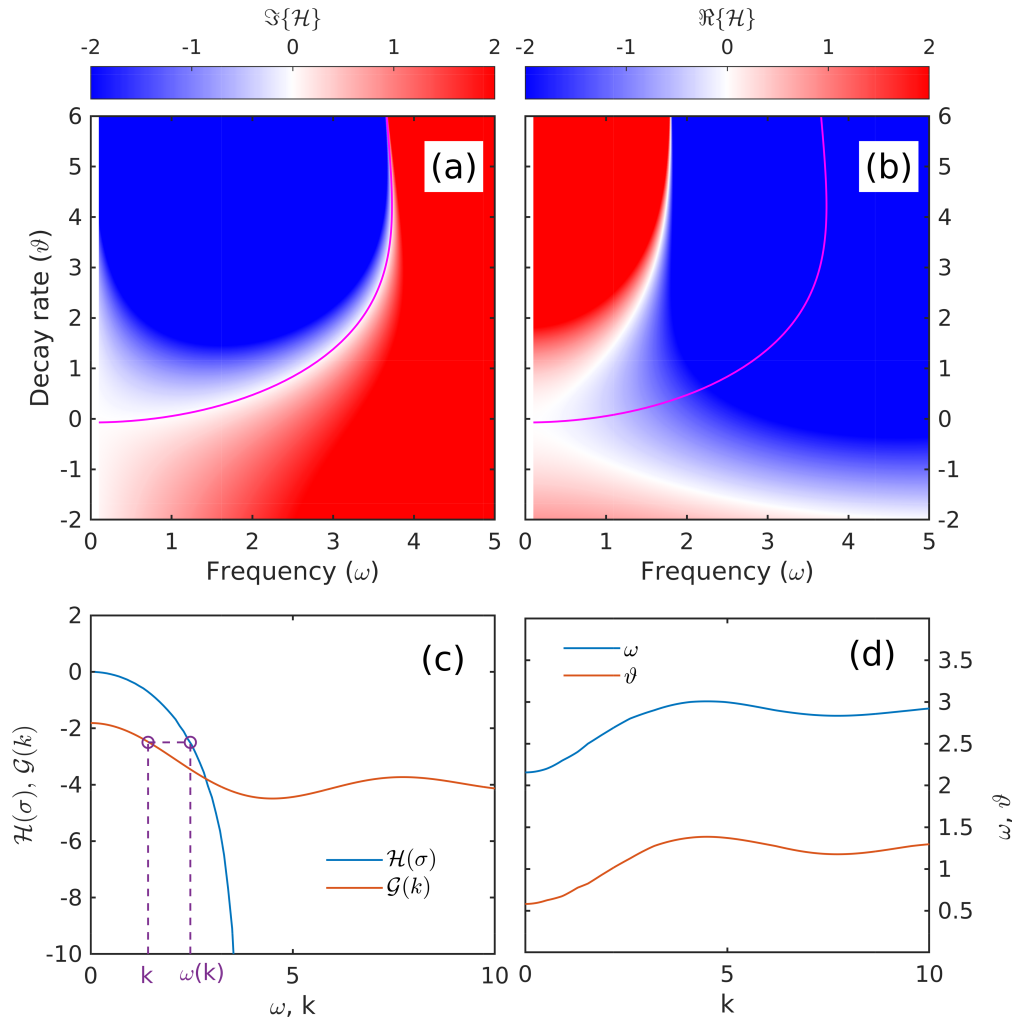

FIGURE 7. Graphic representation of the solution of equations 35 for progressive waves, for  $\epsilon = 4.0$ ,  $Q/\rho = 0.1$ ,  $c = 1.0$ ,  $A = 0.4$ . a)  $\Im\{\mathcal{H}\}$ , the imaginary part of  $\mathcal{H}(\sigma)$  in the complex plane  $\sigma = \omega + i\vartheta$ . The white domain (curve) in panel (a) provides the set of all values  $\sigma_w$  (magenta curve) such that  $\Im\{\mathcal{H}(\sigma_w)\} = 0$ . This set corresponds to waves (hence the subscript). b)  $\Re\{\mathcal{H}\}$ , the real part of  $\mathcal{H}(\sigma)$  in the  $\sigma$  complex plane (the green curve is the set  $\sigma_w$ ). c) Graphs of  $\mathcal{G}(k)$  and  $\mathcal{H}(\omega)$ , where  $\omega = \Re\{\sigma_w\}$ . To find the frequency corresponding to a given value of  $k$ , i.e., satisfying the dispersion relation  $\mathcal{G}(k) = \mathcal{H}(\omega)$ , move horizontally to find  $\mathcal{H}(\omega) = \mathcal{G}(k)$ , and vertically to find the corresponding  $\omega$  (dashed purple line). d) Frequency  $\omega(k) = \Re\{\sigma_w(k)\}$  and decay rate  $\vartheta = \Im\{\sigma_w(k)\}$  as functions of the wave number  $k$ .

989 that 2) the role of dissipation increases at small scales (the ratio of dissipation rate to fre-  
 990 quency grows from approximately 0.25 near  $k \approx 0$  to 0.5 near  $k \approx 4$ ). While the plots in  
 991 figure 7 are constructed for a particular set of constants, we expect them to reflect a general  
 992 behavior.

993 The dispersion problem for excitatory networks was examined before by Meijer and Coombes  
 994 [2014], who used the Wilson and Cowan [1972b, 1973] model to investigate Turing instabil-  
 995 ities for populations with large enough refractory periods (several times of membrane time

996 constant), looking for evidence of stationary standing or traveling solitary-wave solutions  
997 (wave “bumps”). Because the interest of their study was solitary waves, they used a numerical  
998 scheme “co-moving frame” to construct stationary solitary-wave solutions for both an equiva-  
999 lent delay differential model, and the original delay integro-differential model. The approach  
1000 produced a dispersion-like relation between the wave speed and spatial scale, but because  
1001 it refers to solitary waves, it is not a dispersion relation in the proper sense (e.g., Whitham,  
1002 2011). The proper dispersion relation was also derived by assuming a slow change of  $u$  over  
1003 refractory period; however, the result is somewhat self-contradictory, because the solution  
1004 varies on the same refractory-time scale. Because periodic waves were not the goal of the  
1005 study, the dispersion relation is not discussed at length. The major contribution of Meijer  
1006 and Coombes [2014] study is arguably in highlighting the essential role of refractoriness in  
1007 propagating patterns of collective activity.

## 1008 8. LINEAR ANALYSIS: DUAL-TYPE (EXCITATORY-INHIBITORY) NEURAL FIELDS

1009 A dual-type neural field is of much higher interest than a single-type one, as a more realis-  
1010 tic description of the mesoscopic dynamics of coupled excitatory-inhibitory (EI) neural fields  
1011 the neocortex [Desimone and Duncan, 1995, Luck et al., 1997, Reynolds et al., 1999, Fries,  
1012 2005, Bosman et al., 2012] and hippocampus [Traub et al., 1998, Kopell et al., 2000, Bartos  
1013 et al., 2007, Aton et al., 2013]. Previous studies point to inhibitory mechanisms as the main  
1014 process driving rhythms in both inhibitory and excitatory-inhibitory networks. For single-  
1015 type inhibitory fields the most well known mechanism is the Interneuron Network Gamma  
1016 (ING; White et al., 1998, Kopell et al., 2010, Whittington et al., 2000, Wang, 2010). However,  
1017 as described by [Buzsáki, 2006], a mixed population of interneurons and pyramidal cells of-  
1018 fers complex dynamics that are capable of supporting multiple spatio-temporal patterns (for  
1019 a recent review, see [Berg et al., 2019]). Recurrent connectivity between inhibitory and exci-  
1020 tatory neurons provides the the mechanism by which a rhythmic, evolving pattern of activity  
1021 can develop. The putative monosynaptic communication tends to be low latency or even syn-  
1022 chronous [English et al., 2017, Diba et al., 2014]. Through this, it is possible to marginalize  
1023 the refractory time associated with neuron to neuron communication.

1024 Following previous studies [e.g., Amari, 1977, Jirsa and Haken, 1997, Wright and Liley, 1995b,  
1025 Jirsa and Haken, 1996, Amari, 2014], we neglect for now the effects of refractory time; while  
1026 we are interested in an accurate description of refractory effects, low refractoriness is adopted  
1027 here as a simplification reduces the complexity of equations (population excitability becomes  
1028  $a = 1$ ). Below, the inhibition effect is reflected by the sign of the energy recaptured by the  
1029 field from firings by inhibitory neurons: we assume  $\epsilon^{E \rightarrow E} >$  and  $\epsilon^{E \rightarrow I} > 0$ , but  $\epsilon^{I \rightarrow I} < 0$  and  
1030  $\epsilon^{I \rightarrow E} < 0$ .

1031 The linear analysis of the equations for dual-type neural fields follows the same steps as used  
1032 in section 7. Starting from the governing equations 6, we apply the simplifications introduced

1033 in section 6, and neglecting the refractory terms, the governing equation may be written as

$$\frac{\partial u^\alpha}{\partial t} = \frac{F^\alpha}{\rho^\alpha} - N^\alpha U - cu^\alpha, \quad (36a)$$

$$F^\alpha = Q^\alpha + \sum_{\beta} \epsilon^{\beta \rightarrow \alpha} \rho^\beta \sum_{j=0}^{\infty} b_{2j} \frac{\partial^{2j} N^\beta}{\partial x^{2j}} \quad (36b)$$

$$N^\alpha = G(u^\alpha). \quad (36c)$$

1034 where  $\alpha = E, I$  for excitatory and inhibitory neurons, respectively. The governing equations  
1035 were simplified further by assuming that parameters  $c$ ,  $b_{2j}$ , and  $U$  do not depend on neuron  
1036 type. Expanding as before the variables in the asymptotic series

$$u^\alpha = u_0^\alpha + \delta u_1^\alpha + O(\delta^2); \quad N^\alpha = N_0^\alpha + \delta N_1^\alpha + O(\delta^2)$$

1037 and substituting into the governing equations produces the two systems of equations for the  
1038 equilibrium states and for the leading order perturbations.

1039 **8.1. Equilibrium states.** At  $O(\delta^0)$ , the equations for the equilibrium state are:

$$\frac{\partial u_0^\alpha}{\partial t} = \frac{F_0^\alpha}{\rho^\alpha} - N_0^\alpha U^\alpha - cu^\alpha(N_0^\alpha) = 0, \quad \alpha = E, I \quad (37a)$$

$$F_0^\alpha = Q^\alpha + \sum_{\beta} \epsilon^{\beta \rightarrow \alpha} \rho^\beta N_0^\beta \quad (37b)$$

1040 Taking the firing rates  $N^\alpha$  as free parameters, the solutions of equations 37a may be obtained  
1041 graphically by examining the intersections surfaces  $\partial u^\alpha / \partial t$  as functions of  $N^\alpha$  with the zero  
1042 plane (figure 8, left panels). A visualization of the equilibrium states as the intersection of the  
1043 two curves obtained this way is shown in figure 8. As before, coupled dynamics of excitatory  
1044 and inhibitory neural fields problem depends on parameters  $c, A, \epsilon, \rho$  and  $Q$  but the number of  
1045 parameters doubles. Because an exhaustive exploration of the parameter space is beyond the  
1046 scope of this discussion, we assume again that the important dynamical parameters are  $A$  and  
1047  $\epsilon^{I \rightarrow E}$  or  $\epsilon^{E \rightarrow I}$ . As suggested by the analysis of a single-type neural field,  $A$  plays an important  
1048 role in equilibrium bifurcation, and parameters  $\epsilon^{I \rightarrow E}$  or  $\epsilon^{E \rightarrow I}$  (connection strengths between  
1049 inhibitory and excitatory neurons) describe the effect of inhibition, which is the interesting  
1050 point in dual types of neurons: if either  $\epsilon^{I \rightarrow E}$  or  $\epsilon^{E \rightarrow I}$  cancel, the field defaults to the single-  
1051 type neural field, discussed in section 7. The rest of the parameters are assumed kept constant  
1052 at the (arbitrary) values  $\epsilon^{E \rightarrow E} = 4$ ,  $\epsilon^{I \rightarrow I} = 0$ ,  $Q^E / \rho^E = 0.1$ ,  $Q^I / \rho^I = 0$ ,  $c = 0.5$ ,  $A = 0.4$ .

1053 **8.2. Perturbations of equilibrium.** At  $O(\delta^1)$ , replacing  $u_1^\alpha$  in leading order by  $N_1^\alpha$ , the per-  
1054 turbation the equations are,

$$\frac{1}{s_0^\alpha} \frac{\partial N_1^\alpha}{\partial t} = \frac{F_1^\alpha}{\rho^\alpha} - \delta N_1^\alpha U - c \frac{1}{s_0^\alpha} N_1^\alpha, \quad (38a)$$

$$F_1^\alpha = \sum_{\beta} \epsilon^{\beta \rightarrow \alpha} \rho^\beta \sum_{j=0}^{\infty} b_{2j} \frac{\partial^{2j} N_1^\beta}{\partial x^{2j}} \quad (38b)$$



1055 where  $s_0^\alpha = \left(\frac{dN^\alpha}{du^\alpha}\right)_0$ , and  $s_0^\alpha u_1^\alpha = N_1^\alpha$  if  $\delta^2$  terms are ignored. For homogeneous perturbations,  
1056 equation 38 reduces to

$$\frac{1}{s_0^\alpha} \frac{\partial N_1^\alpha}{\partial t} = \frac{F_1^\alpha}{\rho^\alpha} - \delta N_1^\alpha U - c \frac{1}{s_0^\alpha} N_1^\alpha, \quad (39)$$

$$F_1^\alpha = \sum_{\beta} \epsilon^{\beta \rightarrow \alpha} \rho^\beta b_0 N_1^\beta. \quad (40)$$

1057 **8.2.1. Homogeneous perturbations.** As before, for stability analysis, solutions are sought in  
1058 the form  $N^\alpha = C^\alpha e^{\sigma t}$ , where  $\sigma \in \mathbb{C}$ , with the real part  $\vartheta = \Re\{\sigma\}$  representing the growth(decay)  
1059 rate, and the imaginary part  $\omega = \Im\{\sigma\}$  representing the frequency of oscillation. We assume  
1060 that the two neuron populations have the same type of dynamics (growth rate, frequency),  
1061 but allow for different amplitudes and phases, represented by  $C^\alpha \in \mathbb{C}$ . Therefore, the phase  
1062 lag between the two populations is defined as

$$\phi = \arg\left(\frac{C^I}{C^E}\right). \quad (41)$$

1063 With these notations, straightforward algebra (see details in appendix, section B) obtains

$$\sigma = \frac{1}{2} \left(-b \pm \sqrt{\Delta}\right), \quad \Delta = b^2 + 4\Lambda, \quad (42a)$$

1064 where

$$b = s \left(s_0^E \epsilon^{E \rightarrow E} - U s_0^E - c\right) + \left(s_0^I \epsilon^{I \rightarrow I} - U s_0^I - c\right) = s_0^E \frac{\partial (du^E/dt)}{\partial N^E} + s_0^I \frac{\partial (du^I/dt)}{\partial N^I}, \quad (42b)$$

$$\Lambda = \left(\epsilon^{I \rightarrow E} \frac{\rho^I}{\rho^E}\right) \left(\epsilon^{E \rightarrow I} \frac{\rho^E}{\rho^I}\right) s_0^I s_0^E, \quad (42c)$$

1065 and the phase lag is

$$\phi = \arg\left(\frac{\frac{1}{s_0^E} s + U + c \frac{1}{s_0^E} - \epsilon^{E \rightarrow E}}{\epsilon^{I \rightarrow E} \frac{\rho^I}{\rho^E}}\right). \quad (42d)$$

1066 As before, oscillatory patterns correspond to  $\Delta < 0$  in equation 42a. In contrast with the case  
1067 single-type field, for EI fields the term  $\Lambda = \left(\epsilon^{I \rightarrow E} \frac{\rho^I}{\rho^E}\right) \left(\epsilon^{E \rightarrow I} \frac{\rho^E}{\rho^I}\right) s_0^I s_0^E$  always negative because  
1068 of the inhibitory effect ( $\epsilon^{I \rightarrow E} < 0$ ), therefore oscillations are naturally available. The relation  
1069 42b between  $b$  and the partial derivatives of the rate of change of the internal kinetic energy  
1070 provides a useful tool to understand the stability of the equilibrium states. From figure 8, the  
1071 slope  $\frac{\partial (du^E/dt)}{\partial N^E}$  of the blue surface along the  $N^E$  axis) can be either positive or negative, while  
1072 the slope  $\frac{\partial (du^I/dt)}{\partial N^I}$  of  $du^I/dt$  in the  $N^I$  direction is naturally negative (because  $s_0^I \epsilon^{I \rightarrow I}$  is always  
1073 negative thus  $\frac{s_0^I \epsilon^{I \rightarrow I} - U s_0^I - c}{s_0^I} < 0$  as well). Therefore,  $b$  can be either either positive or negative,  
1074 implying that growth and decay are both mechanistically supported around the equilibrium  
1075 states. The phase portraits sketched in figure 8.a-b, have the geometric constraints that the  
1076 vector field has to be vertical along the curve  $\frac{dN^E}{dt} = 0$  (blue), and nowhere else, and and  
1077 horizontal along the curve  $\frac{dN^E}{dt} = 0$  (red), and nowhere else. However, because the actual

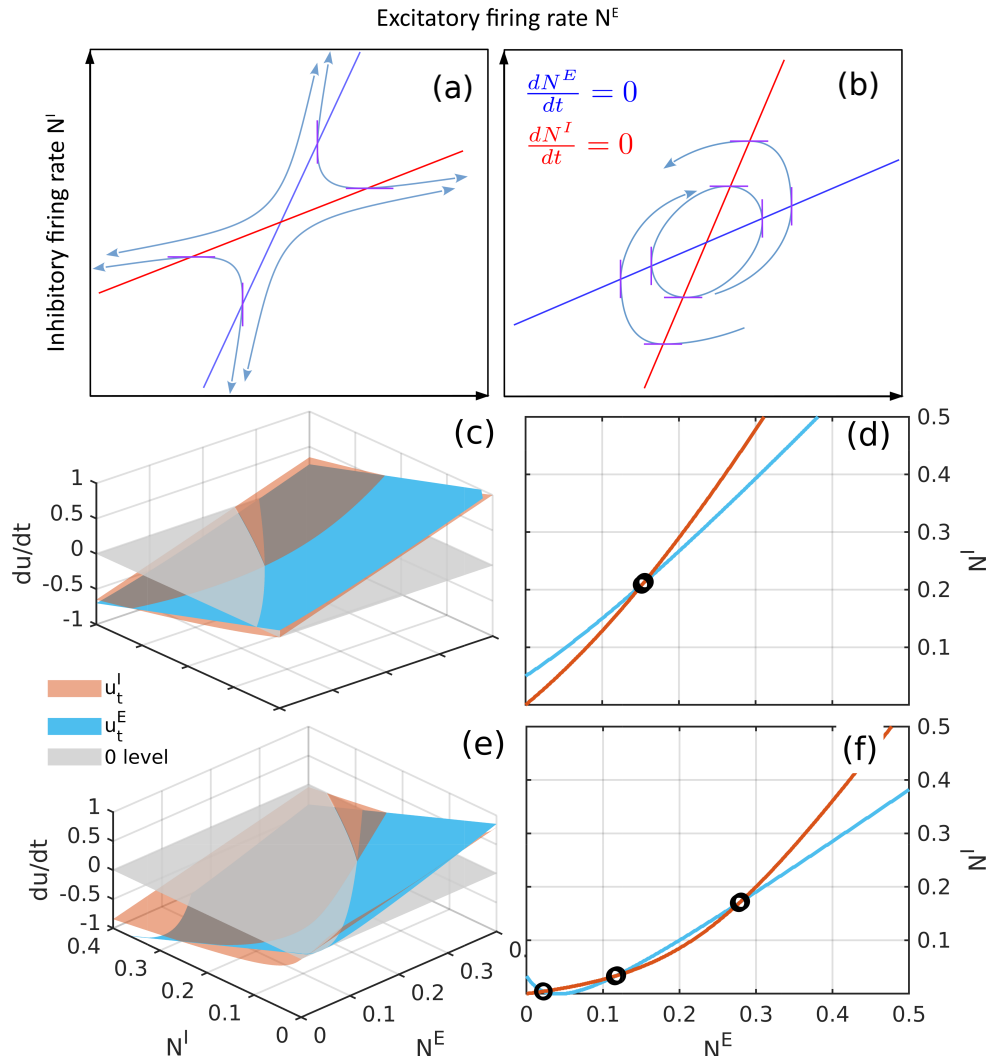

FIGURE 8. Typical equilibrium states of coupled excitatory and inhibitory populations. a-b) Possible configurations of curves  $\frac{dN^E}{dt} = 0$  (blue), and  $\frac{dN^I}{dt} = 0$  (red). The angle between the direction of the associated the vector field and the  $N^E$  axis is 90 degrees along the blue curve and 0 degrees along the red curve, and  $\neq 0, 90$  degrees everywhere else. c,e) An illustration of equilibrium points as intersections of the surfaces  $u_t^E(N^E, N^I)$  (blue) and  $u_t^I(N^E, N^I)$  (red) and the zero surface (gray). d,f) Illustration of the equilibrium points as intersections of the curves  $u_t^E(N^E, N^I) = 0$  and  $u_t^I(N^E, N^I) = 0$  (curves representing the intersection of the blue and red surfaces with the gray one). Panels (c-d) correspond to a single equilibrium fixed point ( $\epsilon^{E \rightarrow E} = 4$ ,  $\epsilon^{E \rightarrow I} = 2.5$ ,  $\epsilon^{I \rightarrow E} = -2.5$ ,  $\epsilon^{I \rightarrow I} = 0$ ,  $Q^E/\rho^E = 0.1$ ,  $Q^I/\rho^I = 0$   $c^E = c^I = 0.5$ ,  $A^E = A^I = 0.4$ ). Panels (e-f) correspond to a case with three equilibrium points ( $\epsilon^{E \rightarrow E} = 4$ ,  $\epsilon^{E \rightarrow I} = 2$ ,  $\epsilon^{I \rightarrow E} = -3$ ,  $\epsilon^{I \rightarrow I} = 0$ ,  $Q^E/\rho^E = 0.1$ ,  $Q^I/\rho^I = 0$   $c^E = c^I = 0.5$ ,  $A^E = A^I = 0.05$ )

1078 direction of the flow is not specified, if the slope of the blue curve is larger than the slope of  
 1079 the red curve, the equilibrium point is an unstable saddle point; if slope of the blue curve is  
 1080 less than slope of red curve (figure 8.b) the equilibrium point can be either a center, or a stable  
 1081 spiral, or an unstable spiral.

1082 Figure 9 includes several visualizations of dynamical patterns in the phase portraits. In the  
1083 neighborhood of stable equilibrium states, if  $\Delta < 0$  and the connectivity  $\epsilon^{E \rightarrow E}$  is weak enough,  
1084 the interaction between excitatory neurons may not be enough to maintain oscillatory ampli-  
1085 tudes ( $b$  is not likely to be a positive value), and a decaying oscillatory pattern arises (figure  
1086 9.a-b). Specially when the decay rate  $b$  is small enough, almost no oscillatory pattern will  
1087 be seen and the dynamics is a nearly monotonic collapse towards equilibrium (figure 9.e-f).  
1088 Near unstable equilibrium states (figure 9.c-d), if  $\Delta < 0$  and  $b > 0$ , the interaction between  
1089 excitatory and inhibitory neurons amplifies oscillatory amplitudes.

1090 In contrast to single-type excitatory neural fields, which support refractory oscillations only  
1091 at high firing rates, oscillatory patterns exist in EI fields even when firing rate is low. This in-  
1092 dicates that the generating mechanism of the homogeneous oscillations of EI fields shown in  
1093 figure 9 relies on interaction between the two types of neurons. These oscillations will be re-  
1094 ferred to as “interactive oscillations”. While refractory oscillations may exist only in densely  
1095 firing networks (high  $\epsilon$ ), EI-type of interactive oscillations may be generated at low firing  
1096 rates, i.e., near lower-activity equilibrium states. Qualitatively, increased activity of excitatory  
1097 neurons increases the internal kinetic energy of connected inhibitory population. Cumulative  
1098 hysteresis effects on the inhibitory internal kinetic energy triggers delayed activation rates of  
1099 inhibitory neurons, which, in turn inhibit excitatory activity. The firing rate of excitatory pop-  
1100 ulation drops below equilibrium, but, as the kinetic energy of the inhibitory population also  
1101 drops below equilibrium, the excitatory population recovers the ability of high firing rates.  
1102 Our model provides a mathematical description of this mechanism, in contrast with other  
1103 models, that rely on structural delays to generate waves (e.g., axonal delays in Jirsa and Haken,  
1104 1996, 1997 and Wright and Liley, 1995b; update delay in Cowan et al., 2016). In fact, our sim-  
1105 plified model is able to treat delays as negligible and still resolve oscillations.

1106 The examples shown in figure 9 suggest that the time scales (periods) of interactive oscillatory  
1107 patterns (decided by the discriminant in equation 42a), are similar in magnitude to refractory  
1108 oscillations (several refractory periods, i.e., frequencies between 80 Hz to 130 Hz). When we  
1109 get into spatially in-homogeneous cases, we will see spatial contribution decreases slightly on  
1110 the frequencies. The observation that interactive oscillations may be generated at lower firing  
1111 rate is consistent with in-vivo observations of gamma waves [Ray and Maunsell, 2011]. This  
1112 suggests that the EI interactive oscillations generated by coupled excitatory and inhibitory  
1113 fields in sparsely firing networks might provide a mathematical basis for understanding the  
1114 fundamental oscillatory frequency identified as gamma.

1115 **8.3. Inhomogeneous perturbations (collective action).** As before, following the “progres-  
1116 sive wave” convention, we look for solutions in the form  $N^\alpha = C^\alpha e^{i(kx + \sigma t)}$ ,  $\alpha = E, I$ , where  
1117 real values represent oscillations and imaginary values represent decay of growth. We also  
1118 assume that the mesoscopic activity of both excitatory and inhibitory populations is charac-  
1119 terized by the same spatial and temporal structure. Substituting into equation 38 obtains the

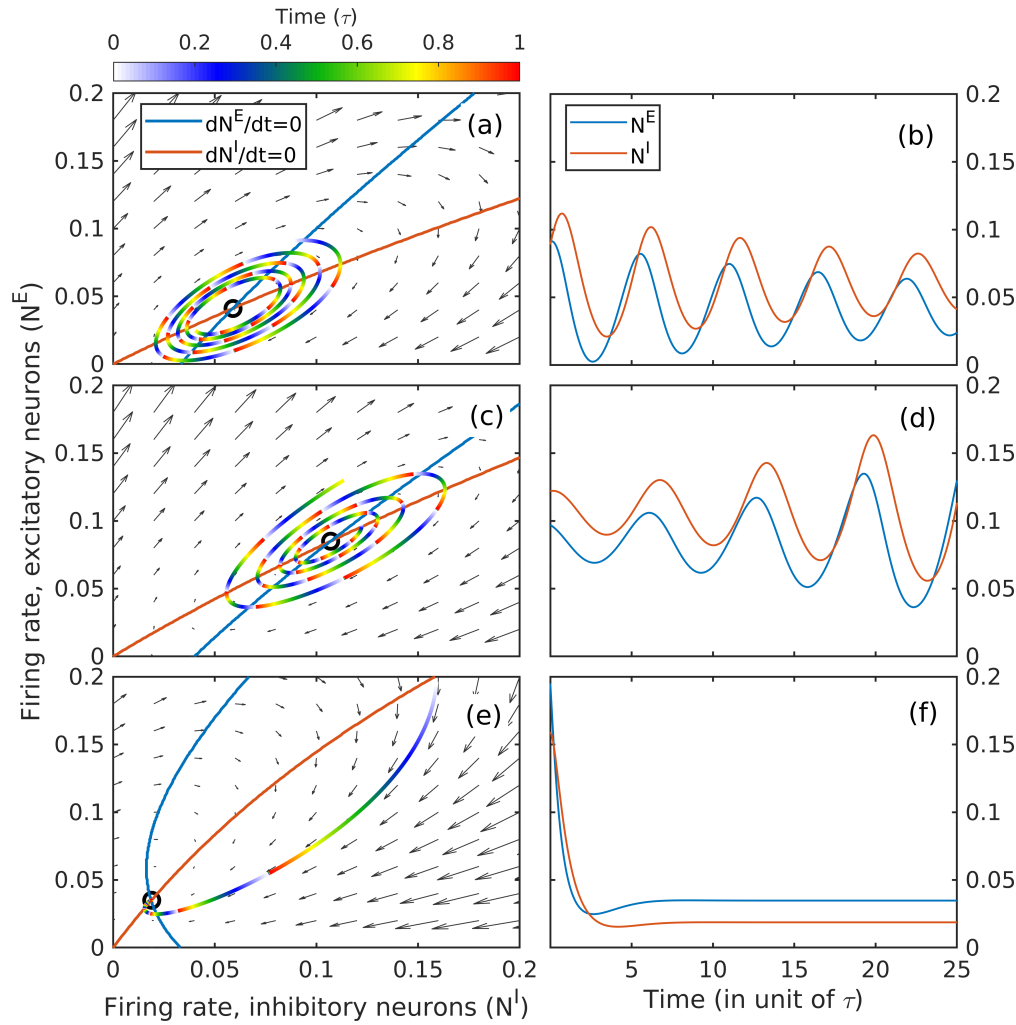

FIGURE 9. Typical oscillatory patterns of coupled excitatory and inhibitory populations. Left column contains phase portraits of temporal evolution. A trace starting from an arbitrary state is shown for each case, one epoch of color map denotes one equivalent refractory period. Right column contains numerically integrated oscillatory patterns of firing rate for both excitatory and inhibitory population. The upper and lower rows correspond to illustrative cases with  $b < 0$ , parameters are and respectively  $\epsilon^{E \rightarrow E} = 4$ ,  $\epsilon^{E \rightarrow I} = 3$ ,  $\epsilon^{I \rightarrow E} = -3$ ,  $\epsilon^{I \rightarrow I} = 0$ ,  $Q^E/\rho^E = 0.1$ ,  $Q^I/\rho^I = 0$   $c^E = c^I = 0.5$ ,  $A^E = A^I = 0.4$  and  $\epsilon^{E \rightarrow E} = 4$ ,  $\epsilon^{E \rightarrow I} = 3$ ,  $\epsilon^{I \rightarrow E} = -3$ ,  $\epsilon^{I \rightarrow I} = 0$ ,  $Q^E/\rho^E = 0.1$ ,  $Q^I/\rho^I = 0$   $c^E = c^I = 1.0$ ,  $A^E = A^I = 0.2$ ; The medial row correspond to an illustrative case with  $b > 0$ , parameters are  $\epsilon^{E \rightarrow E} = 4$ ,  $\epsilon^{E \rightarrow I} = 2.5$ ,  $\epsilon^{I \rightarrow E} = -2.5$ ,  $\epsilon^{I \rightarrow I} = 0$ ,  $Q^E/\rho^E = 0.1$ ,  $Q^I/\rho^I = 0$   $c^E = c^I = 0.5$ ,  $A^E = A^I = 0.4$ .

1120 algebraic equation (dispersion relation for waves; see details of the algebra in appendix C)

$$\begin{aligned}
 2i\sigma = & \sum_{\beta} \left[ s_0^{\beta} \epsilon^{\beta \rightarrow \beta} \left( 1 + \sum_{j=1}^{\infty} b_{2j}(ik)^{2j} \right) - U s_0^{\beta} - c \right] \\
 & \pm \left\{ \left( \sum_{\beta} \frac{\epsilon^{\beta \rightarrow \beta}}{\|\epsilon^{\beta \rightarrow \beta}\|} \left[ s_0^{\beta} \epsilon^{\beta \rightarrow \beta} \left( 1 + \sum_{j=1}^{\infty} b_{2j}(ik)^{2j} \right) - U s_0^{\beta} - c \right] \right)^2 \right. \\
 & \left. + 4\epsilon^{I \rightarrow E} \epsilon^{E \rightarrow I} \left( 1 + \sum_{j=1}^{\infty} b_{2j}(ik)^{2j} \right)^2 s_0^I s_0^E \right\}^{1/2}
 \end{aligned} \tag{43a}$$

$$\phi = \arg \left( \frac{\frac{1}{s_0^E} (i\sigma) + U + c \frac{1}{s_0^E} - \epsilon^{E \rightarrow E} \left( 1 + \sum_{j=1}^{\infty} b_{2j}(ik)^{2j} \right)}{\epsilon^{I \rightarrow E} \frac{\rho^I}{\alpha^E} \left( 1 + \sum_{j=1}^{\infty} b_{2j}(ik)^{2j} \right)} \right), \tag{43b}$$

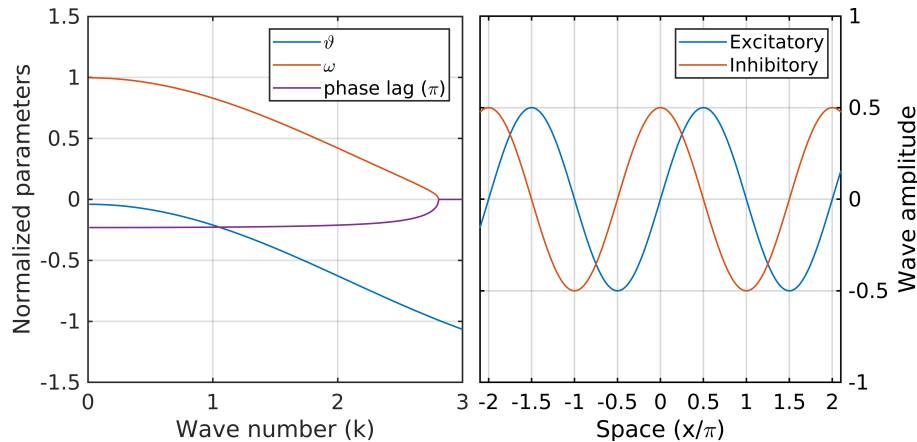

FIGURE 10. Left panel: A typical dispersion relation and phase lag of coupled excitatory & inhibitory neurons. Parameters for this case are:  $\epsilon^{E \rightarrow E} = 4$ ,  $\epsilon^{E \rightarrow I} = 3$ ,  $\epsilon^{I \rightarrow E} = -3$ ,  $\epsilon^{I \rightarrow I} = 0$ ,  $Q^E/\rho^E = 0.1$ ,  $Q^I/\rho^I = 0$ ,  $c^E = c^I = 0.5$ ,  $A^E = A^I = 0.4$ ; Right panel: Schematic wave form of linear interactive waves.

1121 Similar as our interest in temporal dynamics of excitatory neurons, dynamical patterns of  
 1122 temporal interactions between excitatory and inhibitory neurons are also studied. The wave  
 1123 frequency  $\omega$  and growth rate  $\alpha$  as a function of real wave number  $k$  are plotted in Figure 10  
 1124 for an illustrative case.

1125 This sort of waves shown in the dispersion relation are called interactive waves analogous to  
 1126 interactive oscillations in the homogeneous case. Interactive waves (figure 10.a) show crests  
 1127 of inhibitory activity lagging behind excitatory activity (in the case shown, the phase lag is  
 1128 approximately  $\pi/4$ ). Qualitatively, the wave pattern may be described as a hysteresis-driven  
 1129 alternation of highs and lows of excitatory activity, which triggers a delayed increase of inter-  
 1130 nal kinetic energy in locally connected inhibitory population. Thus, lagging inhibitory activity  
 1131 suppresses local excitatory population, and the cycle repeats itself.

1132 The parameters characterizing the dispersion relation of interactive waves are shown in fig-  
 1133 ure 10. Remarkably, the frequency is monotonically decreasing with increasing amplitudes,  
 1134 but the wave character of these patterns also depends on the dissipation rate, which increases  
 1135 with the wave number. The domain of interactive waves is effectively cut off in the neighbor-  
 1136 hood of  $k \approx 1$ ; above this value, the dissipation rate becomes comparable, implying that the  
 1137 perturbations decay too fast to qualify as oscillations in time. Following the same reason-  
 1138 ing as for single-type neural fields, this suggests that interactive oscillations (which could be  
 1139 identified as zero wave-number interactive waves) provide an upper bound for the frequency  
 1140 range of interactive waves, consistent with gamma frequencies in sparsely-firing networks.

1141

## 9. DISCUSSION

1142 Our prior interpretation of spectra and bispectra of hippocampal LFP suggests that meso-  
 1143 scopic collective activity is a perturbation of an background (equilibrium) state that displays  
 1144 the fundamental features of a turbulent system: weak nonlinearity [Sheremet et al., 2019b],  
 1145 stochastic behavior [Freeman, 2000b,a, Sheremet et al., 2018b, Zhou et al., 2019], and weak  
 1146 dissipation. To investigate further this hypothesis requires theoretical and numerical models  
 1147 capable of describing activity of a large populations of neurons. Although mesoscopic activity



1148 has been the focus of considerable research, the key thermodynamic models, due to Wilson  
1149 and Cowan [1972b, 1973], Cowan et al. [2016] and Amari [1977], have drawbacks significant  
1150 enough to consider revisiting the formulation of the governing equations.

1151 Here, we present the derivation of a thermodynamic model for mesoscale collective action  
1152 based on the fundamental assumption that the mean neuron in a neural field is characterized  
1153 by two different stages of evolution: 1) a sub-threshold stage, in which the neuron is at “mi-  
1154 croscopic” equilibrium, well described by the potential averaged over the surface of the cell  
1155 membrane; and 2) a transitional stage, corresponding to the potential spiking, in which a large  
1156 electric pulse propagates along neural membrane. The latter stage has the remarkable prop-  
1157 erty that the neuron is for a short period of time essentially unresponsive to stimuli (absolute  
1158 refractory state). From a thermodynamic perspective, the former stage is characterized by  
1159 an internal kinetic energy which could be defined as proportional to the averaged membrane  
1160 potential. However, the averaged membrane potential is not well defined during the firing  
1161 process, and the state of the neuron is ill defined. This suggests distinguishing between two  
1162 types of energy: a potential energy, released during a spike, and the internal, sub-threshold  
1163 kinetic energy, that serves as the trigger for a spike. From a thermodynamics perspective, in-  
1164 ternal kinetic energy is a state variable, i.e., characterizing the state of the neuron. In contrast,  
1165 the energy captured from the potential energy released by a firing is a process variable, e.g.,  
1166 similar to heat fluxes in classical thermodynamics.

1167 The thermodynamic formulation based on these considerations on the dynamics of the “leaky  
1168 integrate-and-fire” neuron model is essentially the powder-keg paradigm. The “temperature”  
1169 of a keg plays the role of internal kinetic energy: if it exceeds a threshold, it triggers the ex-  
1170 plosion of the keg, i.e., the release of the potential energy. Some of the energy released is  
1171 recaptured by the system, increasing locally the temperature, as well as providing temporal  
1172 (oscillatory) organization. From a thermodynamic perspective, a large collection of powder  
1173 kegs is described by two state variables: the excitability and the internal kinetic energy of the  
1174 element of volume of the neural field. The process of neurons firing is treated as a process  
1175 variable involved in the energy exchange of the system with its environment. The formaliza-  
1176 tion of this concept leads to a system of integro-differential equations that may be seen as a  
1177 generalization of the Wilson and Cowan [1972b, 1973] and Amari [1977] models, with the  
1178 main advantage being the explicit evolution equations for the two state variables.

1179 We examined linear approximations of the governing equations for single-type (excitatory)  
1180 and dual-type (excitatory-inhibitory) neural fields. Both cases exhibit states with internal  
1181 kinetic energy balance that translate into single- or triple-point equilibrium states. Our anal-  
1182 ysis agrees with previous observations (e.g., Meijer and Coombes, 2014, Coombes et al., 2014,  
1183 Muller et al., 2018a) that the refractoriness property of the system, i.e., the existence at any  
1184 time of a fraction of neural population that is “disabled” and cannot fire, is a crucial element in  
1185 the generation of oscillatory behavior. In single-type neural systems, this ability is provided  
1186 by the natural refractory state of a neuron, with the direct consequence that temporal scale of  
1187 both homogeneous and inhomogeneous oscillations is of the order of the refractory period.  
1188 We call these “refractory oscillations/waves”. In dual-type systems, the inhibitory compo-  
1189 nent can take over this function and the system can support oscillations even if the refractory  
1190 period of individual neurons is ignored. We call these “interactive oscillations/waves”. This  
1191 property is at the root of the major difference in the linear behavior of the two types of sys-  
1192 tems. The dynamics of single-type excitatory neural fields are naturally decaying, with all  
1193 equilibrium states globally stable, and with oscillations occupying a “small” domain in the

1194 phase space (figure 4.b), typically corresponding to high firing rate. In contrast, dual-type  
1195 (excitatory-inhibitory) neural fields support oscillations at much lower activity levels, and  
1196 are intrinsically more unstable, with globally unstable states possible.

1197 In interpreting the results of the linear analysis it is important to note that 1) the discussion  
1198 refers to the linear analysis of a simplified version of the governing equations 6 and not of  
1199 the full equations (this is particularly relevant for wave solutions, given the strong isotropy  
1200 constraint imposed); and 2) that, although the analysis of the linear system is essential for  
1201 understanding the nonlinear behavior of the system, it does not provide an interpretation of  
1202 the spectral shapes observed (any spectral shape may correspond to a solution of the linear  
1203 system). Nonetheless, isotropic results should be relevant at least for small enough meso-  
1204 scopic scales (e.g., gamma oscillations and ripples); and linear considerations do provide an  
1205 interpretation of the local dynamics at different scales.

1206 With these reservations, and assuming that the model presented here has any relevance for  
1207 the interpretation of LFP measurements, several suggestions seem to emerge:

1208 (1) The linear analysis shown provides a representation of processes that occupy the rip-  
1209 ple and gamma frequency bands. Single-type neural fields support refractory oscillations and  
1210 waves only at high firing rates ( $N$ ), consistent with observations of “replay during ripples”  
1211 [Kudrimoti et al., 1999].

1212 (2) The theta rhythm does not satisfy the dispersion relation 10 (dissipation of interactive  
1213 waves is too strong at theta scale), implying that theta cannot propagate as a free wave in the  
1214 hippocampus, hence it has to be an externally forced oscillation. While this is consistent with  
1215 the global nature of theta, observations [e.g., Lubenov and Siapas, 2009] do show that theta  
1216 has a well defined direction of propagation in the hippocampus, and therefore does not satisfy  
1217 our isotropy constraint. It is therefore possible that theta simply does not belong to the family  
1218 of isotropic solutions discussed here. Either way, the analysis presented here suggests that  
1219 global theta forcing may play a major role in modulating key parameters of the system: inter-  
1220 nal kinetic energy and excitability (refractoriness) levels, and thus in maintaining equilibrium  
1221 states, and providing the increased activity necessary to sustain mesoscopic collective action.

1222 (3) Previous nonlinear analysis [Sheremet et al., 2019b] suggests that gamma oscillations  
1223 reside preferentially in the theta trough (e.g., theta-gamma biphase  $\approx 180$  degrees). This is  
1224 consistent with the “linear” analysis: the trough of theta corresponds to locally higher forced  
1225 activity levels (higher external input  $Q$  in our model). In the linear model, increased energy  
1226 input decreases the stability of the equilibrium state, facilitating mesoscopic oscillations.

1227 (4) Revisiting the schematic spectra in figure 1, our analysis suggests that the gamma fre-  
1228 quency band is occupied by interactive processes, possibly waves, bounded above by nearly-  
1229 homogeneous oscillations (see the dispersion relation in figure 10). In the upper frequency  
1230 bands, probably dominated by refractory processes, the role of waves and oscillations re-  
1231 verts, with oscillations having lower frequencies than waves. If theta is considered strictly as  
1232 a forcing term, the increase of gamma power with theta is consistent with the increase of the  
1233 oscillation amplitude with the forcing.

1234 The model presented here comes with the overall implicit - and parsimonious - assumption  
1235 that brain activity may be described within the framework of thermodynamics, providing a  
1236 background to understand the physics by which the brain organizes behavior. The ubiquity  
1237 across species and brain regions of isotropic and homogeneous mesoscale neuronal struc-  
1238 tures [Lorente de No, 1938, Parent and Hazrati, 1995, Marder and Bucher, 2001, Garamszegi

1239 and Eens, 2004, Apps and Garwicz, 2005, Mante et al., 2013] suggests the existence of a “uni-  
1240 versal computational principle”. Freeman and Vitiello [2010] hypothesize (citing Lashley,  
1241 1942), that mesoscale processes are the essential cognition step of abstraction and gener-  
1242 alization of a particular stimulus to a category of equivalent inputs, “because they require  
1243 the formation of nonlocal, very large-scale statistical ensembles (our emphasis)”. As often  
1244 argued [e.g., Freeman, 2000a, Frisch, 2014, Edelman and Gally, 2001], physical processes un-  
1245 derlying cognition are expected to resemble biological processes, with no design and no a  
1246 priori function [Edelman and Gally, 2001]. Frisch [2014] notes that “biological systems have  
1247 an intrinsic ability to maintain functions in the course of structural changes”, such that “spe-  
1248 cific functions can obviously be constituted on the basis of structurally different elements, a  
1249 biological property that is referred to under the term degeneracy [Edelman and Gally, 2001]”.  
1250 It is possible that mesoscopic collective action is the basis of the “universal computational  
1251 principle”. As computational support, mesoscopic collective action has significant reconfig-  
1252 uration potential, especially under a priori unknown conditions [Sussillo and Abbott, 2009].  
1253 Understanding mesoscopic activity dynamics may be the first step toward understanding the  
1254 elusive process of brain integration.

1255 APPENDIX A. THE ACTIVATION FUNCTION AND THE POSITIVE-DEFINITE CHARACTER OF THE  $u$   
1256 AND  $a$

1257 Here, we discuss the hypotheses and approximations used in the derivation of the activation  
1258 function used in this study. Although the powder-keg model belongs to the Wilson and Cowan  
1259 [1972b, 1973] and Amari [1977] class of models, the definition of essential variables such as  
1260 the firing rate  $N$  and the state variables  $u$  (mean internal kinetic energy) and  $a$  (excitability) is  
1261 different enough to require a re-examination of the activation function. Because the focus of  
1262 this study is to construct the model and examine its basic properties, much of the derivation  
1263 presented below is driven by the need to simplify. At this stage, we leave it to future efforts to  
1264 implement more complicated formulations.

1265 The powder-keg governing equations 6a-6d describe the activity of a neural field in the limit  
1266 of a very large number of neurons per unit volume. For a finite number of neurons, the de-  
1267 terministic representation given by equation 6d may be interpreted as an ensemble average,  
1268 i.e., an average over many repetitions of the same experiment. It is easy to argue, however,  
1269 that a realistic representation of the firing rate (even in a deterministic form) should include  
1270 some information of other elements of the stochastic nature of the firing process: for exam-  
1271 ple, the variance of membrane fluctuations should play a major role in the effective values of  
1272 threshold levels for firing.

1273 it seems reasonable to assume that the firing rate depends crucially on two elements: 1) on  
1274 the probability of a neuron to fire (related to the proximity of the state of a given neuron to  
1275 the threshold, which involves, say the variance of the membrane fluctuations, but possibly  
1276 other/all moments of the probability density); and 2) the distribution of internal kinetic en-  
1277 ergy over the neural population.

1278 Denote by  $u(t)$  the subthreshold, mean membrane depolarization. Invoking an ergodicity ar-  
1279 gument, the internal kinetic energy  $u$  defined above may be regarded as a time average of  
1280  $u(t)$ . Assuming that the subthreshold  $u(t)$  is a time-integral of the activity of ion channels,  
1281 and that ion channels open and close randomly,  $u(t)$  as a stochastic process may be modeled  
1282 as a random walk. Even if the mean internal kinetic energy  $u$  is fixed, neurons may fire as  
1283 a response to the random walk  $u(t)$ . Moreover, qualitatively speaking, neurons with higher  
1284 depolarization are more likely to fire. Let  $P(u)$  be the firing probability of a neuron with in-  
1285 ternal kinetic energy  $u$ . The observations above imply that  $P(u)$  is a monotonically increasing  
1286 function, with  $P(0) = 0$  and  $P(U) = 1$ . Denote by  $p(u)$  the probability of a neuron to fire in  
1287 the unit of time. Because a neuron fires instantaneously when it reaches the threshold level  
1288  $U$ ,  $p(U) = \infty$ .

1289 As discussed in section 4, the distribution of  $u$  over the population of neurons in an element  
1290 of volume is characterized by a probability density function  $f_u(u)$ , which may be written as

$$f_u(u) = (1 - a)\delta(u) + af_{u,a}(u, x, t), \quad (44)$$

1291 where the first term denotes the sub-population that is in refractory state (kinetic energy  $u =$   
1292  $0$ , where  $\delta$  is the Dirac delta function), and  $f_{u,a}(u, x, t)$  is the PDF component corresponding to  
1293 active neurons. Taking into account the excitability  $a(x, t)$ , the mean kinetic energy is

$$0 \leq u = \int_0^U uf_u(u)du \leq aU. \quad (45)$$

1294 Because the firing rate as defined here is the number of firing events in the unit of time, the  
 1295 relationship between the firing rate of the population and its PDF  $f_u(u)$  is given by the “acti-  
 1296 vation functional”

$$N = \int_0^U f_u(u)p(u)du. \quad (46)$$

1297 In the extreme case that  $u = aU$ , we have  $f_{u,a}(u, x, t) = \delta(u - U)$ , thus firing rate  $N = \infty$ . As  
 1298 shown by equation 46, an accurate description of the time-evolution of the firing rate based  
 1299 on on the statistical state of the system involves fully detailed knowledge of the PDF  $f_u(u)$ .  
 1300 Alternatively, assuming that the moments of  $f_u(u)$  completely characterize it, one could write

$$N = N(u, a, \mu_2, \mu_3, \dots, \mu_n, \dots), \quad (47)$$

1301 where  $\mu_n$  is the  $n$ -th moment of  $f_u$ , where we assumed that the firing rate does not depend  
 1302 explicitly on time (note that the functional form  $\mathcal{N}$  is different from the function  $G$  appearing  
 1303 in equation 5).

1304 **A.1. Simplification of the activation function.** Without further guidance about the the shape  
 1305 of  $p(u)$  and  $f_u(u)$  (or all its moments), the only way to progress from equations 46 or 47 fol-  
 1306 lows the beaten path of putting our hopes in assuming that the moments of  $f_u$  are well ordered  
 1307 at all times, i.e.,  $\mu_{n+1} \ll \mu_n$ , and basically ignore all moments but the zeroth order (mean),  
 1308 i.e., write

$$N = N(u, a), \quad (48)$$

1309 instead of equation 47. The simplified activation function should be a monotonically increas-  
 1310 ing function of  $u \in [0, U]$ , with the end-point values  $N(u = 0, a) = 0$  and  $N(u = U, a) = \infty$ .  
 1311 A plausible functional form consistent with these constraints is

$$N(u, a) = A \left( \frac{a}{aU - u} - a \right) = Aa \left( \frac{1}{U - au} - 1 \right) \quad (49)$$

1312 where the constant  $A$  is a measure of the intensity of endogenous membrane potential fluc-  
 1313 tuations. To further simplify the activation function, we may ignore the effect of  $a$  by setting  
 1314 for this calculation  $a \approx 1$  and effectively keeping only  $u$  as the controlling factor of the firing  
 1315 rate, which yields the expression given in equation 20, i.e.,

$$N(u) = A \left( \frac{1}{U - u} - 1 \right). \quad (50)$$

1316 Equation 50 is arguably a “simplest” form of the activation function that describes the firing  
 1317 rate only as a function of the mean kinetic energy  $u$ . While this relation satisfies the leading or-  
 1318 der conditions stated above, it underestimates the firing rate in comparison with expression  
 1319 49 but hopefully the difference is small unless  $a \rightarrow 0$ , when a very large proportion of neurons  
 1320 are in absolute refractory state and  $f_{u,a}(u, x, t) \rightarrow \delta(u - U)$ . However, this condition implies  
 1321 that  $f_u(u)$  is a U-shaped function, with large proportion of neurons in absolute refractory pe-  
 1322 riod, while the rest have a near threshold kinetic energy. This means the variance of  $f_u(u)$   
 1323 is relatively large. However, this cannot be a not a common condition of a network, because  
 1324 membrane depolarization in a network tends to be synchronized rather than the opposite  
 1325 (e.g., Wilson and Cowan, 1972a).



1326 Therefore, we adopt for the activation function in this preliminary study the simple form 50,  
1327 which is readily inverted to yield

$$u(N) = U - \frac{A}{N + A}. \quad (51)$$

1328 **A.2. The bounds of state variables  $a$  and  $u$ .** A heuristic argument is as follows. From the  
1329 definitions given in section 4, neurons in their absolute refractory period correspond to  $u = 0$ .  
1330 Because  $a$  is the fraction of neuron population not in the absolute refractory state, and  $U$  is  
1331 the maximum value of kinetic energy of individual neurons, the maximum value of  $u$  is  $Ua$ ,  
1332 hence  $u < Ua$ . The energy  $u$  cannot exceed  $Ua$  because the activation function 46 has the  
1333 property that  $N \rightarrow \infty$  as  $u \rightarrow aU$ , and in this case a large number of neurons drop to the level  
1334  $u = 0$ . This logic is also true for the simplified version of the activation function 49 that rely  $N$   
1335 on both  $u$  and  $a$ . However, whether the mathematical form of the model obeys this reasoning  
1336 depends on the form of the activation function. From equations 7

$$\frac{\partial}{\partial t} (u - Ua) = \frac{F}{\rho}a - NU - cu - U \left( \frac{1-a}{\tau} - N \right),$$

1337 and using equation 1 obtains

$$\frac{\partial}{\partial t} (u - Ua) = \frac{F}{\rho}a - cu + U \int_{-\infty}^t N(t_1)r'(t - t_1)dt_1,$$

1338 where  $r'(\xi) = \frac{dr}{d\xi} \leq 0$ , with input  $\frac{F}{\rho}a > 0$ , and the “inertial” terms  $-cu + U \int_{-\infty}^t N(t_1)r'(t -$   
1339  $t_1)dt_1 < 0$ . In the limit  $N \rightarrow \infty$  (equivalent to  $u \rightarrow Ua$ ),  $\frac{\partial}{\partial t} (u - Ua)$  remains finite; in  
1340 contrast,  $\frac{\partial^2}{\partial t^2} (u - Ua) \rightarrow -\infty$ , thus would not allow  $u$  to exceed  $Ua$ . The derivative is negative  
1341 if the forcing term  $\frac{F}{\rho}a$  is negligible, but may become positive if the value of external input  
1342 overwhelms the inertial (negative) part, which implies that  $u$  could exceed  $Ua$  ( $a$  decays as  
1343  $N \rightarrow \infty$ , and so does the contribution of the incoming of the forcing term  $\frac{F}{\rho}a$ ). For the second  
1344 derivative after some algebra, one obtains

$$\frac{\partial^2 (u - Ua)}{\partial t^2} = - \left( \frac{F}{\rho}a - cUa - Ua \left. \frac{\partial r(t)}{\partial t} \right|_0 \right) \frac{N}{a} + \text{terms that are finite.}$$

1345 If  $\frac{\partial}{\partial t} (u - Ua) > 0$  when  $u \rightarrow Ua$ , i.e., if  $\frac{F}{\rho}a > cu \rightarrow cUa$ , then  $\frac{\partial^2}{\partial t^2} (u - Ua) \rightarrow -\infty$ , and  
1346 consequently  $u$  would not exceed  $Ua$ . The activation function tells us that  $N$  approaches 0  
1347 when  $u$  approaches 0. The  $u < Ua$  argument thus implies that  $u \rightarrow 0$  as  $a \rightarrow 0$ . Moreover,  
1348  $N \rightarrow 0$  as  $u \rightarrow 0$ , thus, from equation 6c  $\partial a / \partial t > 0$ , which insures that  $a$  cannot become  
1349 negative.

1350 Because the simplest form of the activation function 50 underestimates the firing rate, it is  
1351 possible that it would indeed allow  $u$  to exceed the upper boundary  $Ua$  in extreme condi-  
1352 tions when the external input  $q$  is very strong and the undervalued bursting rate is not large  
1353 enough to cool down the system. However, assuming that the neural field operates far from  
1354 this limiting case, the simple form 50 should provide a good approximation.

1355 APPENDIX B. GROWTH RATE AND PHASE LAG FOR DUAL-TYPE NEURAL FIELDS AT EQUILIBRIUM

1356 Take  $N^E = C^E e^{\sigma t}$ ;  $\frac{dN^E}{dt} = C^E \sigma N^E$  into Equation 39 with  $\alpha = E$  we have

$$N^I = \frac{\left( \frac{1}{s_0^E} s + U + c \frac{1}{s_0^E} - \epsilon^{E \rightarrow E} \right)}{\left( \epsilon^{I \rightarrow E} \frac{\rho^I}{\rho^E} \right)} N^E \quad (52)$$

1357 In which, the ratio of  $N^I$  over  $N^E$  is a complex number, phase of the ratio is the phase lag  
1358 between inhibitory and excitatory populations.

$$\phi = \arg \left( \frac{\left( \frac{1}{s_0^E} \sigma + U + c \frac{1}{s_0^E} - \epsilon^{E \rightarrow E} \right)}{\left( \epsilon^{I \rightarrow E} \frac{\rho^I}{\rho^E} \right)} \right)$$

1359 Take  $N^I = C^I e^{\sigma t}$ ;  $\frac{dN^I}{dt} = C^I \sigma N^I$  into Equation 39 with  $\alpha = I$  we have

$$N^E = \frac{\left( \frac{1}{s_0^I} \sigma + U + c \frac{1}{s_0^I} - \epsilon^{I \rightarrow I} \right)}{\left( \epsilon^{E \rightarrow I} \frac{\rho^E}{\rho^I} \right)} N^I \quad (53)$$

1360 Combining Equation 52 with Equation 53 we know that.

$$\frac{\left( \frac{1}{s_0^E} \sigma + U + c \frac{1}{s_0^E} - \epsilon^{E \rightarrow E} \right)}{\left( \epsilon^{I \rightarrow E} \frac{\rho^I}{\rho^E} \right)} \frac{\left( \frac{1}{s_0^I} \sigma + U + c \frac{1}{s_0^I} - \epsilon^{I \rightarrow I} \right)}{\left( \epsilon^{E \rightarrow I} \frac{\rho^E}{\rho^I} \right)} = 1$$

1361 Then the complex oscillation frequency  $\sigma$  satisfy a quadratic equation

$$\begin{aligned} & \sigma^2 + [(Us_0^E + c - s_0^E \epsilon^{E \rightarrow E}) + (Us_0^I + c - s_0^I \epsilon^{I \rightarrow I})] \sigma \\ & + (Us_0^E + c - s_0^E \epsilon^{E \rightarrow E}) (Us_0^I + c - s_0^I \epsilon^{I \rightarrow I}) - \left( \epsilon^{I \rightarrow E} \frac{\rho^I}{\rho^E} \right) \left( \epsilon^{E \rightarrow I} \frac{\rho^E}{\rho^I} \right) s_0^I s_0^E = 0 \end{aligned}$$

1362 Thus the solutions of  $\sigma$  are

$$\begin{aligned} 2\sigma = & [(s_0^E \epsilon^{E \rightarrow E} - Us_0^E - c) + (s_0^I \epsilon^{I \rightarrow I} - Us_0^I - c)] \\ & \pm \sqrt{[(s_0^E \epsilon^{E \rightarrow E} - Us_0^E - c) - (s_0^I \epsilon^{I \rightarrow I} - Us_0^I - c)]^2 + 4 \left( \epsilon^{I \rightarrow E} \frac{\rho^I}{\rho^E} \right) \left( \epsilon^{E \rightarrow I} \frac{\rho^E}{\rho^I} \right) s_0^I s_0^E} \end{aligned}$$

1363 APPENDIX C. DISPERSION RELATION FOR DUAL-TYPE NEURAL FIELDS

1364 Take  $N^E = C^E e^{i(kx + \sigma t)}$ ;  $\frac{\partial^2 N^E}{\partial x^2} = C^E (ik)^2 N^E$ ;  $\frac{\partial N^E}{\partial t} = C^E (i\sigma) N^E$  into Equation 38a with  $\alpha = E$   
1365 we have.

$$N^I = \frac{\frac{1}{s_0^E} (i\sigma) + U + c \frac{1}{s_0^E} - \epsilon^{E \rightarrow E} \left( 1 + \sum_{j=1}^{\infty} b_{2j} (ik)^{2j} \right)}{\epsilon^{I \rightarrow E} \frac{\rho^I}{\rho^E} \left( 1 + \sum_{j=1}^{\infty} b_{2j} (ik)^{2j} \right)} N^E \quad (54)$$

1366 In which, the ratio of  $N^I$  over  $N^E$  is a complex number, phase of the ratio is the phase lag  
1367 between inhibitory and excitatory populations.

$$\phi = \arg \left( \frac{\frac{1}{s_0^E} (i\sigma) + U + c \frac{1}{s_0^E} - \epsilon^{E \rightarrow E} \left( 1 + \sum_{j=1}^{\infty} b_{2j}(ik)^{2j} \right)}{\epsilon^{I \rightarrow E} \frac{\rho^I}{\rho^E} \left( 1 + \sum_{j=1}^{\infty} b_{2j}(ik)^{2j} \right)} \right)$$

1368 Take  $N^I = C^I e^{i(kx + \sigma t)}$ ;  $\frac{\partial^2 N^I}{\partial x^2} = (ik)^2 N^I$ ;  $\frac{\partial N^I}{\partial t} = (i\sigma) N^I$  into Equation 38a with  $\alpha = I$  we have.

$$N^E = \frac{\frac{1}{s_0^I} (i\sigma) + U + c \frac{1}{s_0^I} - \epsilon^{I \rightarrow I} \left( 1 + \sum_{j=1}^{\infty} b_{2j}(ik)^{2j} \right)}{\epsilon^{E \rightarrow I} \frac{\rho^E}{\rho^I} \left( 1 + \sum_{j=1}^{\infty} b_{2j}(ik)^{2j} \right)} N^I \quad (55)$$

1369 Combining Equation 54 with Equation 55 we know that.

$$\frac{\left[ \frac{1}{s_0^E} (i\sigma) + U + c \frac{1}{s_0^E} - \epsilon^{E \rightarrow E} \left( 1 + \sum_{j=1}^{\infty} b_{2j}(ik)^{2j} \right) \right]}{\epsilon^{I \rightarrow E} \frac{\rho^I}{\rho^E} \left( 1 + \sum_{j=1}^{\infty} b_{2j}(ik)^{2j} \right)} \frac{\left[ \frac{1}{s_0^I} (i\sigma) + U + c \frac{1}{s_0^I} - \epsilon^{I \rightarrow I} \left( 1 + \sum_{j=1}^{\infty} b_{2j}(ik)^{2j} \right) \right]}{\epsilon^{E \rightarrow I} \frac{\rho^E}{\rho^I} \left( 1 + \sum_{j=1}^{\infty} b_{2j}(ik)^{2j} \right)} = 1$$

1370 Then the complex oscillation frequency  $\sigma$  as a function of  $k$  satisfy a quadratic equation that

$$\begin{aligned} -\sigma^2 + \left[ \left( Us_0^E + c - s_0^E \epsilon^{E \rightarrow E} \left( 1 + \sum_{j=1}^{\infty} b_{2j}(ik)^{2j} \right) \right) + \left( Us_0^I + c - s_0^I \epsilon^{I \rightarrow I} \left( 1 + \sum_{j=1}^{\infty} b_{2j}(ik)^{2j} \right) \right) \right] (i\sigma) \\ + \left( Us_0^E + c - s_0^E \epsilon^{E \rightarrow E} \left( 1 + \sum_{j=1}^{\infty} b_{2j}(ik)^{2j} \right) \right) \left( Us_0^I + c - s_0^I \epsilon^{I \rightarrow I} \left( 1 + \sum_{j=1}^{\infty} b_{2j}(ik)^{2j} \right) \right) \\ - \left[ \epsilon^{I \rightarrow E} \frac{\rho^I}{\rho^E} \left( 1 + \sum_{j=1}^{\infty} b_{2j}(ik)^{2j} \right) \right] \left[ \epsilon^{E \rightarrow I} \frac{\rho^E}{\rho^I} \left( 1 + \sum_{j=1}^{\infty} b_{2j}(ik)^{2j} \right) \right] s_0^I s_0^E = 0 \end{aligned}$$

1371 Thus the solutions of  $\sigma$  are

$$\begin{aligned} 2i\sigma = s_0^E \epsilon^{E \rightarrow E} \left( 1 + \sum_{j=1}^{\infty} b_{2j}(ik)^{2j} \right) - Us_0^E - c \\ + s_0^I \epsilon^{I \rightarrow I} \left( 1 + \sum_{j=1}^{\infty} b_{2j}(ik)^{2j} \right) - Us_0^I - c \\ \pm \left\{ \left[ \left( s_0^E \epsilon^{E \rightarrow E} \left( 1 + \sum_{j=1}^{\infty} b_{2j}(ik)^{2j} \right) - Us_0^E - c \right) \right. \right. \\ \left. \left. - \left( s_0^I \epsilon^{I \rightarrow I} \left( 1 + \sum_{j=1}^{\infty} b_{2j}(ik)^{2j} \right) - Us_0^I - c \right) \right]^2 \right. \\ \left. + 4 \left[ \epsilon^{I \rightarrow E} \frac{\rho^I}{\rho^E} \left( 1 + \sum_{j=1}^{\infty} b_{2j}(ik)^{2j} \right) \right] \left[ \epsilon^{E \rightarrow I} \frac{\rho^E}{\rho^I} \left( 1 + \sum_{j=1}^{\infty} b_{2j}(ik)^{2j} \right) \right] s_0^I s_0^E \right\}^{1/2} \end{aligned}$$

1372

REFERENCES

- 1373 B. V. Alexeev. *Generalized Boltzmann Physical Kinetics*. Elsevier, 2004.
- 1374 P. G. Allen and F. S. Collins. Toward the final frontier: the human brain. *The Wall Street Journal*,  
1375 2013.
- 1376 D.G. Amaral, H.E. Scharfman, and P. Lavenex. The dentate gyrus: fundamental neuroanatomical  
1377 cal organization (dentate gyrus for dummies). *Progress in Brain Research*, 163:3–22, 2007.  
1378 doi: 10.1016/S0079-6123(07)63001-5.
- 1379 S. Amari. Homogeneous nets of neuron-like elements. *Biological Cybernetics*, 17:211–220,  
1380 1975.
- 1381 S. Amari. Dynamics of pattern formation in lateral-inhibition type neural fields. *Biological*  
1382 *Cybernetics*, 27, 1977.
- 1383 S. Amari. Heaviside world: Excitation and self-organization of neural fields. *Neural Fields:*  
1384 *Theory and Applications*, pages 97–118, 03 2014. doi: 10.1007/978-3-642-54593-1\_3.
- 1385 Bénédicte Amilhon, Carey YL Huh, Frédéric Manseau, Guillaume Ducharme, Heather Nichol,  
1386 Antoine Adamantidis, and Sylvain Williams. Parvalbumin interneurons of hippocampus  
1387 tune population activity at theta frequency. *Neuron*, 86(5):1277–1289, 2015.
- 1388 R. Apps and M. Garwicz. Anatomical and physiological foundations of cerebellar information  
1389 processing. *Nature Reviews Neuroscience*, 6.4:297, 2005. doi: 10.1038/nrn1646.
- 1390 V. I. Arnold. *Mathematical Methods of Classical Mechanics*, volume 60 of *Graduate Texts in*  
1391 *Mathematics*. Springer, 1974. ISBN 978-0387968902.
- 1392 S.J. Aton, C. Broussard, M. Dumoulin, J. Seibt, A. Watson, T. Coleman, and M.G. Frank. Visual ex-  
1393 perience and subsequent sleep induce sequential plastic changes in putative inhibitory and  
1394 excitatory cortical neurons. *Proceedings of the National Academy of Sciences of the United*  
1395 *States of America*, 110:3101–3106, 2013.
- 1396 A. Attardo, J. E. Fitzgerald, and M. J. Schnitzer. Impermanence of dendritic spines in live adult  
1397 ca1 hippocampus. *Nature*, 523(7562):592–596, 2015. ISSN 1476-4687. doi: 10.1038/nature14467. URL <https://www.ncbi.nlm.nih.gov/pubmed/26098371>.
- 1398 Per Bak, Chao Tang, and Kurt Wiesenfeld. Self-organized criticality. *Physical Review A*, 38:  
1399 364–375, 1988.
- 1400 M. Bartos, I. Vida, and P. Jonas. Synaptic mechanisms of synchronized gamma oscillations in  
1401 inhibitory interneuron networks. *Nature Reviews Neuroscience*, 8:45–56, 2007.
- 1402 John M. Beggs and Dietmar Plenz. Neuronal Avalanches in Neocortical Circuits. *Journal of*  
1403 *Neuroscience*, 23(35):11167–11177, 2003.
- 1404 John M. Beggs and Nicholas Timma. Being Critical of Criticality in the Brain. *Frontiers in*  
1405 *Physiology*, 3:163, 2012.
- 1406 R.W. Berg, A. Willumsen, and H. Lindén. When networks walk a fine line: balance of excitation  
1407 and inhibition in spinal motor circuits. *Current Opinion in Physiology*, 8:76–83, 2019. ISSN  
1408 2468-8673.
- 1409 R. L. Beurle and Bryan Harold Cabot Matthews. Properties of a mass of cells capable  
1410 of regenerating pulses. *Philosophical Transactions of the Royal Society of London. Series B, Biological Sciences*, 240(669):55–94, 1956. doi: 10.1098/rstb.1956.0012. URL  
1411 <https://royalsocietypublishing.org/doi/abs/10.1098/rstb.1956.0012>.
- 1412 L. Boltzmann. Weitere Studien über das Wärmegleichgewicht unter Gasmolekülen. *Sitzungs-*  
1413 *berichte Akademie der Wissenschaften*, 66:275–370, 1872.
- 1414 L. Boltzmann. *History of Modern Physical Sciences: Volume 1*, chapter Further Studies on the  
1415 Thermal Equilibrium of Gas Molecules, pages 262–349. World Scientific, 2003.
- 1417

- 1418 C.A. Bosman, J.M. Schoffelen, N. Brunet, R. Oostenveld, A.M. Bastos, T. Womelsdorf, B. Rubehn,  
1419 T. Stieglitz, P. De Weerd, and P. Fries. Attentional stimulus selection through selective syn-  
1420 chronization between monkey visual areas. *Neuron*, 75(5):875–88, 2012.
- 1421 A. Bragin, G. Jando, Z. Nadasdy, J. Hekte, K. Wise, and G. Buzsáki. Gamma (40-100 Hz) oscilla-  
1422 tion in the hippocampus of the behaving rat. *Journal of Neuroscience*, 15:47–60, 1995.
- 1423 M. Breakspear and C.J. Stam. Dynamics of a neural system with a multiscale architecture. *Phil.*  
1424 *Trans. R. Soc. Lond. B*, pages 1051–1074, 2005.
- 1425 M. Breakspear, L.M. Williams, and C.J. Stam. A novel method for the topographic analysis of  
1426 neural activity reveals formation and dissolution of "dynamic cell assemblies". *J. Comput.*  
1427 *Neurosc*, 16:49–68, 2004.
- 1428 Michael Breakspear. Dynamic models of large-scale brain activity. *Nature neuroscience*, 20  
1429 (3):340, 2017.
- 1430 Michael Breakspear, John R Terry, and Karl J Friston. Modulation of excitatory synaptic cou-  
1431 pling facilitates synchronization and complex dynamics in a biophysical model of neuronal  
1432 dynamics. *Network: Computation in Neural Systems*, 14(4):703–732, 2003.
- 1433 P.C. Bressloff. Spatiotemporal dynamics of continuum neural fields. *Journal of Physics*  
1434 *A: Mathematical and Theoretical*, 45(3):033001, dec 2011. doi: 10.1088/1751-  
1435 8113/45/3/033001.
- 1436 G. Buzsáki. Theta oscillations in the hippocampus. *Neuron*, 33:325–340, 2002.
- 1437 G. Buzsáki. *Rhythms of the Brain*. Oxford University Press, 2006.
- 1438 G. Buzsáki. *Rhythms of the Brain*. Oxford University Press, 2006.
- 1439 G. Buzsáki. Hippocampal sharp wave-ripple: A cognitive biomarker for episodic memory and  
1440 planning. *Hippocampus*, 25(10):1073–1188, 2015.
- 1441 G. Buzsáki and A. Draguhn. Neuronal oscillations in cortical networks. *Science*, 304.5679:  
1442 1926–1929, 2004.
- 1443 D. Cai, L. Tao, M. Shelley, and D.W. McLaughlin. An effective kinetic representation of  
1444 fluctuation-driven neuronal networks with application to simple and complex cells in vi-  
1445 sual cortex. *Proceedings of the National Academy of Science USA*, 101:7757–7562, 2004.
- 1446 H. B. Callen. *Thermodynamics*. John Wiley & Sons, Inc., 1960.
- 1447 Luísa Castro and Paulo Aguiar. Phase precession through acceleration of local theta rhythm:  
1448 a biophysical model for the interaction between place cells and local inhibitory neurons.  
1449 *Journal of computational neuroscience*, 33(1):141–150, 2012.
- 1450 Stephen Coombes, Peter beim Graben, Roland Potthast, and James Wright, editors. *Neural*  
1451 *fields, Theory and applications*. Springer, 2014.
- 1452 Stephen; Gabriel J. Lord; Markus R. Owen. Coombes. Waves and bumps in neuronal networks  
1453 with axo-dendritic synaptic interactions. *Physica D: Nonlinear Phenomena*, 178(3-4):219–  
1454 241, 2003.
- 1455 J. D. Cowan, J. Neuman, and W. van Drongelen. Wilson–Cowan Equations for Neocortical Dy-  
1456 namics. *The Journal of Mathematical Neuroscience*, 6(1):1:24, 2016.
- 1457 Rodica Curtu and Bard Ermentrout. Oscillations in a refractory neural net. *Journal of mathe-*  
1458 *matical biology*, 43(1):81–100, 2001.
- 1459 FH Lopes Da Silva, A. Hoeks, H. Smits, and L. H. Zetterberg. Model of brain rhythmic activity,  
1460 the alpha-rhythm of the thalamus. *Kybernetik*, 12(1):27–37, 1974.
- 1461 G. Deco, V.K. Jirsa, P.A. Robinson, M. Breakspear, and K. Friston. The dynamic brain: From  
1462 spiking neurons to neural masses and cortical fields. *PLoS Computational Biology*, 4(8):  
1463 e1000092, 2008. doi: 10.1371/journal.pcbi.1000092.



- 1464 Gustavo Deco, Viktor Jirsa, Anthony R McIntosh, Olaf Sporns, and Rolf Kötter. Key role of  
1465 coupling, delay, and noise in resting brain fluctuations. *Proceedings of the National Academy*  
1466 *of Sciences*, 106(25):10302–10307, 2009.
- 1467 R. Desimone and J. Duncan. Neural Mechanisms of Selective Visual Attention. *Annual Review*  
1468 *of Neuroscience*, 18:193–222, 1995.
- 1469 K. Diba, A. Amarasingham, K. Mizuseki, and G. Buzsáki. Millisecond timescale  
1470 synchrony among hippocampal neurons. *J Neurosci*, 34(45):14984–94,  
1471 2014. ISSN 1529-2401. doi: 10.1523/JNEUROSCI.1091-14.2014. URL  
1472 <http://www.ncbi.nlm.nih.gov/pubmed/25378164>.
- 1473 G. M. Edelman and J. A. Gally. Degeneracy and complexity in biological systems. *Proc Natl*  
1474 *Acad Sci U S A*, 98(24):13763–8, 2001. ISSN 0027-8424. doi: 10.1073/pnas.231499798.  
1475 URL <https://www.ncbi.nlm.nih.gov/pubmed/11698650>.
- 1476 Gerald M Edelman. *Neural Darwinism: The theory of neuronal group selection*. Basic Books,  
1477 1987. ISBN 0465049346.
- 1478 H. Eichenbaum. Barlow versus Hebb: When is it time to abandon the notion of feature detec-  
1479 tors and adopt the cell assembly as the unit of cognition? *Neurosci Letters*, 2017.
- 1480 Sami El Boustani and Alain Destexhe. A master equation formalism for macroscopic modeling  
1481 of asynchronous irregular activity states. *Neural computation*, 21(1):46–100, 2009.
- 1482 D.F. English, S. McKenzie, T. Evans, Kim K., Yoon E., and G. Buzsaki. Pyramidal cell-interneuron  
1483 circuit architecture and dynamics in hippocampal networks. *neuron*, 96(2):505–520, 2017.
- 1484 Bard Ermentrout. Neural networks as spatio-temporal pattern-forming systems. *Reports on*  
1485 *progress in physics*, 61(4):353, 1998. ISSN 0034-4885.
- 1486 G Bard Ermentrout and J Bryce McLeod. Existence and uniqueness of travelling waves for a  
1487 neural network. *Proceedings of the Royal Society of Edinburgh Section A: Mathematics*, 123  
1488 (3):461–478, 1993.
- 1489 G.B Ermentrout and D. Kleinfeld. Traveling electrical waves in cortex: insights from phase  
1490 dynamics and speculation on a computational role. *Neuron*, 29:33–44, 2001.
- 1491 Nicolas Fourcaud and Nicolas Brunel. Dynamics of the firing probability of noisy integrate-  
1492 and-fire neurons. *Neural computation*, 14(9):2057–2110, 2002.
- 1493 W. J. Freeman. *Mass action in the nervous system*. New York: Academic Press, 1975a.
- 1494 W. J. Freeman. A proposed name for aperiodic brain activity: stochastic chaos. *Neural Net-*  
1495 *works*, 13:11–13, 2000a. doi: 10.1016/S0893-6080(99)00093-3.
- 1496 W. J. Freeman. *Neurodynamics: An exploration in mesoscopic brain dynamics*. Perspectives in  
1497 Neural Computing. Springer-Verlag London, 2000b.
- 1498 W. J. Freeman. A cinematographic hypothesis of cortical dynamics in perception. *International*  
1499 *Journal of Psychophysiology*, 60(2):149–161, 2006. doi: 10.1016/j.ijpsycho.2005.12.009.
- 1500 W. J. Freeman and G. Vitiello. Nonlinear brain dynamics as macroscopic manifestation of  
1501 underlying many-body field dynamics. *Physics of Life Reviews*, 3:93–118, 2006. doi:  
1502 doi:10.1016/j.plrev.2006.02.001.
- 1503 Walter J Freeman. *Mass action in the nervous system: examination of the neurophysiologi-*  
1504 *cal basis of adaptive behavior through the EEG*. Academic Press New York:, 1975b. ISBN  
1505 0122671503.
- 1506 Walter J. Freeman. Nonlinear gain mediating cortical stimulus-response relations. *Biological*  
1507 *Cybernetics*, 33(4):237–247, 1979.
- 1508 Walter J. Freeman. The physiology of perception. *Scientific American*, 264(2), 1991.

- 1509 Walter J. Freeman and G. Vitiello. Vortices in brain waves. *International Journal of Modern*  
1510 *Physics B*, 24(17):3269–3295, 2010.
- 1511 P. Fries. A mechanism for cognitive dynamics: neuronal communication through neuronal  
1512 coherence. *Trends in Cognitive Sciences*, 9:474–480, 2005.
- 1513 S. Frisch. How cognitive neuroscience could be more biological—and what it might learn from  
1514 clinical neuropsychology. *Frontiers in Human Neuroscience*, 8(541):1–13, 2014.
- 1515 U. Frisch. *Turbulence, The legacy of A.N Kolmogorov*. Cambridge University Press, 1995.
- 1516 K. Friston. The free-energy principle: a unified brain theory? *Nat Rev Neu-*  
1517 *rosci*, 11(2):127–38, 2010. ISSN 1471-0048. doi: 10.1038/nrn2787. URL  
1518 <https://www.ncbi.nlm.nih.gov/pubmed/20068583>.
- 1519 L.Z. Garamszegi and M. Eens. The evolution of hippocampus volume and brain size in relation  
1520 to food hoarding in birds. *Ecology Letters*, 7.12:1216–1224, 2004.
- 1521 Wulfram Gerstner, Werner M. Kistler, Richard Naud, and Liam Paninski. *Neuronal dynamics:*  
1522 *From single neurons to networks and models of cognition*. Cambridge University Press, 2014.
- 1523 J. W. Gibbs. *Elementary principles in statistical mechanics*. Longmans, Green and Co., 1902.
- 1524 H. Goldstein, C. P. Poole, and J. L. Safko. *Classical Mechanics*. Addison-Wesley, 2014. ISBN  
1525 978-0201657029.
- 1526 J.D. Green and A.A. Arduini. Hippocampal electrical activity in arousal. *Journal of Neurophys-*  
1527 *iology*, 17:533–557, 1954.
- 1528 J.D. Green and X. Machne. Unit activity of rabbit hippocampus. *American Journal of Physiology*,  
1529 181:219–224, 1955.
- 1530 LM Harrison, O David, and KJ Friston. Stochastic models of neuronal dynamics. *Philosophical*  
1531 *Transactions of the Royal Society B: Biological Sciences*, 360(1457):1075–1091, 2005.
- 1532 K. Hasselmann. On the non-linear energy transfer in a gravity-wave spectrum  
1533 part 1. general theory. *Journal of Fluid Mechanics*, 12(4):481–500, 1962. doi:  
1534 10.1017/S0022112062000373.
- 1535 M.E. Hasselmo. f I had a million neurons: Potential tests of cortico-hippocampal theories.  
1536 *Progress in Brain Research*, 219:1–19, 2015.
- 1537 Ryoma Hattori, Kishore V Kuchibhotla, Robert C Froemke, and Takaki Komiyama. Functions  
1538 and dysfunctions of neocortical inhibitory neuron subtypes. *Nature neuroscience*, 20(9):  
1539 1199, 2017.
- 1540 D.O. Hebb. *The organization of behavior: A neuropsychological theory*. Wiley, New York, 1949.
- 1541 A. L. Hodgkin and A. F. Huxley. A quantitative description of membrane current and its appli-  
1542 cation to conduction and excitation in nerve. *J Physiol*, 117(4):500–44, 1952. ISSN 0022-  
1543 3751. URL <http://www.ncbi.nlm.nih.gov/pubmed/12991237>.
- 1544 A. J. Holtmaat, J. T. Trachtenberg, L. Wilbrecht, G. M. Shepherd, X. Zhang, G. W. Knott, and  
1545 K. Svoboda. Transient and persistent dendritic spines in the neocortex in vivo. *Neuron*, 45  
1546 (2):279–291, 2005. doi: 10.1016/j.neuron.2005.01.003.
- 1547 Christopher J Honey, Rolf Kötter, Michael Breakspear, and Olaf Sporns. Network structure of  
1548 cerebral cortex shapes functional connectivity on multiple time scales. *Proceedings of the*  
1549 *National Academy of Sciences*, 104(24):10240–10245, 2007.
- 1550 Rebecca Hoyle and Rebecca B. Hoyle. *Pattern formation: an introduction to methods*. Cam-  
1551 bridge University Press, 2006.
- 1552 X. Huang, W. C. Troy, Q. Yang, H. Ma, C. R. Laing, S. J. Schiff, and J. Y. Wu. Spi-  
1553 ral waves in disinhibited mammalian neocortex. *J Neurosci*, 24(44):9897–  
1554 902, 2004. ISSN 1529-2401. doi: 10.1523/JNEUROSCI.2705-04.2004. URL

- 1555 <http://www.ncbi.nlm.nih.gov/pubmed/15525774>.
- 1556 Ben H. Jansen and Vincent G. Rit. Electroencephalogram and visual evoked potential gener-  
1557 ation in a mathematical model of coupled cortical columns. *Biological cybernetics*, 73(4):  
1558 357–366, 1995.
- 1559 R.A. Jirsa, V.K. & Stefanescu. Neural population modes capture biologically realistic large scale  
1560 network dynamics. *Bull. Math. Biol*, 73:325–343, 2011.
- 1561 V. K. Jirsa and H. Haken. Field Theory of Electromagnetic Brain Activity. *Physical Review Let-*  
1562 *ters*, 77(5):960–963, 1996.
- 1563 V. K. Jirsa and H. Haken. A derivation of a macroscopic field theory of the brain from the quasi-  
1564 microscopic neural dynamics. *Physica D*, 77(5):960–963, 1997.
- 1565 Viktor Jirsa, Olaf Sporns, Michael Breakspear, Gustavo Deco, and Anthony Randal McIntosh.  
1566 Towards the virtual brain: network modeling of the intact and the damaged brain. *Archives*  
1567 *italiennes de biologie*, 148(3):189–205, 2010.
- 1568 M. Kardar. *Statistical Physics of Fields*. Cambridge University Press, 2007a. ISBN 978-0-521-  
1569 87341-3.
- 1570 M. Kardar. *Statistical Physics of Particles*. Cambridge University Press, 2007b. ISBN 978-0-  
1571 521-87342-0.
- 1572 A. I. Khinchin. *Mathematical foundations of statistical mechanics*. Dover Publications Inc.,  
1573 1949.
- 1574 Charles Kittel. *Elementary Statistical Physics*. Wiley, 1958.
- 1575 A.N. Kolmogorov. The local structure of turbulence in incompressible viscous fluid for very  
1576 large Reynolds numbers. *Proceedings: Mathematical and Physical Sciences: Turbulence*  
1577 *and Stochastic Process: Kolmogorov's Ideas 50 Years On (Jul. 8, 1991)*, 434(1890)(30):9–13,  
1578 1941.
- 1579 N. Kopell, G. B. Ermentrout, M. A. Whittington, and R. D. Traub. Gamma rhythms and beta  
1580 rhythms have different synchronization properties. *Proc Natl Acad Sci U S A*, 97(4):1867–  
1581 72, 2000. ISSN 0027-8424. URL <https://www.ncbi.nlm.nih.gov/pubmed/10677548>.
- 1582 N. Kopell, C. Borgers, D. Pervouchine, P. Malerba, and A. Tort. *Gamma and Theta Rhythms in*  
1583 *Biophysical Models of Hippocampal Circuits*. Springer, 2010.
- 1584 H. S. Kudrimoti, C. A. Barnes, and B. L. McNaughton. Reactivation of hippocampal cell assem-  
1585 blies: effects of behavioral state, experience, and eeg dynamics. *J Neurosci*, 19(10):4090–  
1586 101, 1999. ISSN 1529-2401. URL <http://www.ncbi.nlm.nih.gov/pubmed/10234037>.
- 1587 Y. Kuramoto. Self-entrainment of a population of coupled non-linear oscillators. In *Interna-*  
1588 *tional Symposium on Mathematical Problems in Theoretical Physics*, pages 420–422. Lecture  
1589 Springer Notes in Physics, vol 39, 1975.
- 1590 Raima Larter, Brent Speelman, and Robert M Worth. A coupled ordinary differential equation  
1591 lattice model for the simulation of epileptic seizures. *Chaos: An Interdisciplinary Journal of*  
1592 *Nonlinear Science*, 9(3):795–804, 1999.
- 1593 K. S. Lashley. *Visual mechanisms*, volume 301, chapter The Problem of Cerebral Organization  
1594 in Vision, pages 301–322. Oxford, England: Jacques Cattell, 1942.
- 1595 K. S. Lashley. Cerebral organization and behavior. *Research Publications - Association for*  
1596 *Research in Nervous and Mental Disease*, 36(1-4):14–18, 1958.
- 1597 Karl S Lashley, KL Chow, and Josephine Semmes. An examination of the electrical field theory  
1598 of cerebral integration. *Psychological review*, 58(2):123, 1951. ISSN 1939-1471.
- 1599 Klaus Linkenkaer-Hansen, Vadim V Nikouline, J Matias Palva, and Risto J Ilmoniemi. Long-  
1600 range temporal correlations and scaling behavior in human brain oscillations. *Journal of*

- 1601 *Neuroscience*, 21(4):1370–1377, 2001. ISSN 0270-6474.
- 1602 J.E Lisman and M.A. Idiart. Storage of 7 +/- 2 short-term memories in oscillatory subcycles.
- 1603 *Science*, 267:1512–1515, 1995.
- 1604 R. Lorente de No. *Physiology of the nervous system*, chapter Architectonics and structure of
- 1605 the cerebral cortex, pages 291–330. Oxford University Press, 1938.
- 1606 E.V. Lubenov and A.G. Siapas. Hippocampal theta oscillations are travelling waves. *Nature*,
- 1607 (459):534–539, 2009.
- 1608 S. J. Luck, L. Chelazzi, S. A. Hillyard, and R. Desimone. Neural mechanisms of spatial selective
- 1609 attention in areas v1, v2, and v4 of macaque visual cortex. *Annual Review of Neuroscience*,
- 1610 77:24–42, 1997.
- 1611 Brian N Lundstrom, Matthew H Higgs, William J Spain, and Adrienne L Fairhall. Fractional
- 1612 differentiation by neocortical pyramidal neurons. *Nature neuroscience*, 11(11):1335, 2008.
- 1613 C. Ly and D. Tranchina. Critical analysis of a dimension reduction by a moment closure method
- 1614 in a population density approach to neural network modeling. *Neural Computation*, 19:
- 1615 2032–2092, 2007.
- 1616 Wei Ji Ma, Jeffrey M Beck, Peter E Latham, and Alexandre Pouget. Bayesian inference with
- 1617 probabilistic population codes. *Nature neuroscience*, 9(11):1432–1438, 2006.
- 1618 C. J. Maley. Toward analog neural computation. *Minds and Machines*, 28:77–91, 2018.
- 1619 V. Mante, D. Sussillo, K.V. Shenoy, and W.T. Newsome. Context-dependent computation by
- 1620 recurrent dynamics in prefrontal cortex. *Nature*, 503:78–84, 2013.
- 1621 E. Marder and D. Bucher. Central pattern generators and the control of rhythmic movements.
- 1622 *Current Biology*, 11:R986–996, 2001.
- 1623 André C. Marreiros, Jean Daunizeau, Stefan J. Kiebel, and Karl J. Friston. Population dynamics:
- 1624 variance and the sigmoid activation function. *Neuroimage*, 42(1):147–157, 2008.
- 1625 B. L. McNaughton, C. A. Barnes, J.L. Gerrard, K. Gothard, M.W. Jung, J.J. Knierim, H. Ku-
- 1626 drimoti, Y. Qin, W.E. Skaggs, M. Suster, and Weaver. Deciphering the hippocampal
- 1627 polyglot: the hippocampus as a path integration system. *Journal of Experimental Bio-*
- 1628 *logy*, 199(1):173–185, Sep 1996. ISSN 1432-1106. doi: 10.1007/BF00237147. URL
- 1629 <https://doi.org/10.1007/BF00237147>.
- 1630 M. Megias, Z. Emri, T.F. Freund, and A.I. Gulyas. Total number and distribution of inhibitory and
- 1631 excitatory synapses on hippocampal CA1 pyramidal cells. *Neuroscience*, 102(3):527–540,
- 1632 2001.
- 1633 Hil GE Meijer and Stephen Coombes. Travelling waves in a neural field model with refractori-
- 1634 ness. *Journal of mathematical biology*, 68(5):1249–1268, 2014.
- 1635 Jorge F Mejias, John D Murray, Henry Kennedy, and Xiao-Jing Wang. Feedforward and feedback
- 1636 frequency-dependent interactions in a large-scale laminar network of the primate cortex.
- 1637 *Science advances*, 2(11):e1601335, 2016.
- 1638 P. Miller, C. D. Brody, R. Romo, and X. J. Wang. A recurrent network model of somatosensory
- 1639 parametric working memory in the prefrontal cortex. *Cereb Cortex*, 13(11):1208–18, 2003.
- 1640 ISSN 1047-3211. URL <https://www.ncbi.nlm.nih.gov/pubmed/14576212>.
- 1641 John G Milton, Po Hsiang Chu, and Jack D Cowan. Spiral waves in integrate-and-fire neural
- 1642 networks. In *Advances in neural information processing systems*, pages 1001–1006, 1993.
- 1643 L. Muller, F. Chavane, J. Reynolds, and T. J. Sejnowski. Cortical travelling waves: mechanisms
- 1644 and computational principles. *Nat Rev Neurosci*, 19(5):255–268, 2018a. ISSN 1471-0048.
- 1645 doi: 10.1038/nrn.2018.20. URL <https://www.ncbi.nlm.nih.gov/pubmed/29563572>.



- 1646 Lyle Muller, Alexandre Reynaud, Frédéric Chavane, and Alain Destexhe. The stimulus-evoked  
1647 population response in visual cortex of awake monkey is a propagating wave. *Nature com-*  
1648 *munications*, 5(1):1–14, 2014.
- 1649 Lyle Muller, Frederic Chavane, John Reynolds, and Terrence J. Sejnowski. Cortical travelling  
1650 waves: mechanisms and computational principles. *Nature Reviews Neuroscience*, 19:255–  
1651 268, 2018b.
- 1652 S.V. Nazarenko. *Wave Turbulence*. Springer, 2011.
- 1653 Garrett T Neske, Sandra L Patrick, and Barry W Connors. Contributions of diverse excitatory  
1654 and inhibitory neurons to recurrent network activity in cerebral cortex. *Journal of Neuro-*  
1655 *science*, 35(3):1089–1105, 2015.
- 1656 A Newell. *Lectures on Wave Turbulence and Intermittency*, pages 227–271. Springer, 2002.
- 1657 A.C. Newell, S.V. Nazarenko, and L. Biven. Wave turbulence and intermittency. *Physica D:*  
1658 *Nonlinear Phenomena*, 152-153:520–550, 2001. doi: 10.1016/S0167-2789(01)00192-0.
- 1659 Paul L Nunez and Ramesh Srinivasan. *Electric fields of the brain: the neurophysics of EEG*.  
1660 Oxford University Press, USA, 2006. ISBN 019505038X.
- 1661 P.L. Nunez. The brain wave equation: a model for eeg. *Mathematical Bioscience*, 21:279–297,  
1662 1974.
- 1663 D. Nykamp and D. Tranchina. A population density method that facilitates large-scale model-  
1664 ing of neural networks: analysis and application to orientation tuning. *Journal of Compu-*  
1665 *tational Neuroscience*, 8:19–50, 2000.
- 1666 Ahmet Omurtag, Bruce W. Knight, and Lawrence Sirovich. On the simulation of large popula-  
1667 tions of neurons. *Journal of computational neuroscience*, 8(1):51–63, 2000.
- 1668 Remus Osan and Bard Ermentrout. Two dimensional synaptically generated traveling waves  
1669 in a theta-neuron neural network. *Neurocomputing*, 38:789–795, 2001.
- 1670 A. Parent and L.-N. Hazrati. Functional anatomy of the basal ganglia. i. the cortico-basal  
1671 ganglia-thalamo-cortical loop. *Brain Research Reviews*, 20.1:91–127, 1995.
- 1672 J. Patel, S. Fujisawa, A. Berenyi, S. Royer, and G. Buzsaki. Traveling Theta Waves along the  
1673 Entire Septotemporal Axis of the Hippocampus. *Neuron*, 75(3):410–417, 2012.
- 1674 J. Patel, E. W. Schomburg, A. Berenyi, S. Fujisawa, and G. Buzsaki. Local Generation and Prop-  
1675 agation of Ripples along the Septotemporal Axis of the Hippocampus. *Journal of Neuro-*  
1676 *science*, 33(43):17029–17041, 2013.
- 1677 R. K. Pathria and P. D. Beale. *Statistical mechanics*. Elsevier, third edition, 2011.
- 1678 H. Petsche and C. Stumpf. Topographic and toposcopic study of origin and spread of the reg-  
1679 ular synchronized arousal pattern in the rabbit. *Electroencephalography and Clinical Neu-*  
1680 *rophysiology*, 12:589–600, 1960.
- 1681 David J Pinto and G Bard Ermentrout. Spatially structured activity in synaptically coupled  
1682 neuronal networks: I. traveling fronts and pulses. *SIAM journal on Applied Mathematics*, 62  
1683 (1):206–225, 2001a. ISSN 0036-1399.
- 1684 David J Pinto and G Bard Ermentrout. Spatially structured activity in synaptically coupled  
1685 neuronal networks: Ii. lateral inhibition and standing pulses. *SIAM Journal on Applied Math-*  
1686 *ematics*, 62(1):226–243, 2001b.
- 1687 D.J. Pinto, S.L. Patrick, W.C. Huang, and B.W. Connors. Initiation, propagation, and termination  
1688 of epileptiform activity in rodent neocortex in vitro involve distinct mechanisms. *Journal*  
1689 *of Neuroscience*, 25:8131–8140, 2005.
- 1690 A.V. Rangan, G. Kovacic, and D. Cai. Kinetic theory for neuronal networks with fast and slow ex-  
1691 citatory conductances driven by the same spike train. *Physical Review E*, 77:041915, 2008.



- 1692 S. Ray and J. H. Maunsell. Different origins of gamma rhythm and high-  
1693 gamma activity in macaque visual cortex. *PLoS Biol*, 9(4):e1000610,  
1694 2011. ISSN 1545-7885. doi: 10.1371/journal.pbio.1000610. URL  
1695 <https://www.ncbi.nlm.nih.gov/pubmed/21532743>.
- 1696 J. H. Reynolds, L. Chelazzi, and R. Desimone. Competitive mechanisms subserve attention in  
1697 macaque areas v2 and v4. *Journal of Neuroscience*, 19:1736–1753, 1999.
- 1698 L.F. Richardson. *Weather Prediction by Numerical Process*. Cambridge Univ. Press, 1922.
- 1699 P. A. Robinson, C. J. Rennie, and J. J. Wright. Propagation and stability of waves of electrical  
1700 activity in the cerebral cortex. *Physical Review E*, 56(1):826–840, 1997.
- 1701 PA Robinson. Patchy propagators, brain dynamics, and the generation of spatially structured  
1702 gamma oscillations. *Physical Review E*, 73(4):041904, 2006.
- 1703 PA Robinson, CJ Rennie, and DL Rowe. Dynamics of large-scale brain activity in normal arousal  
1704 states and epileptic seizures. *Physical Review E*, 65(4):041924, 2002.
- 1705 A. Sheremet, S. Burke, and A. Maurer. Movement enhances the nonlinearity of hippocampal  
1706 theta. *Journal of Neuroscience*, 36(15):4218–4230, 2016a.
- 1707 A. Sheremet, S. N. Burke, and A. P. Maurer. Movement enhances the non-  
1708 linearity of hippocampal theta. *J Neurosci*, 36(15):4218–30, 2016b.  
1709 ISSN 1529-2401. doi: 10.1523/JNEUROSCI.3564-15.2016. URL  
1710 <http://www.ncbi.nlm.nih.gov/pubmed/27076421>.
- 1711 A. Sheremet, J. P. Kennedy, Y. Qin, Y. Zhou, S. D. Lovett, S. N. Burke, and A. P. Maurer. Theta-  
1712 gamma cascades and running speed. *J Neurophysiol*, 2018a. ISSN 1522-1598. doi:  
1713 10.1152/jn.00636.2018. URL <https://www.ncbi.nlm.nih.gov/pubmed/30517044>.
- 1714 A. Sheremet, Y. Zhou, J.P. Kennedy, Y. Qin, S.N. Burke, and A.P. Maurer. Theta-gamma coupling:  
1715 a nonlinear dynamical model. *BioRxiv*, doi: <https://doi.org/10.1101/304238>, 2018b.
- 1716 A. Sheremet, J. P. Kennedy, Y. Qin, Y. Zhou, S.D. Lovett, Burke S. N., and A.P. Maurer. Theta-  
1717 gamma cascades and running speed. *Journal of Neurophysiology*, 121(2):444–458, 2019a.  
1718 doi: 10.1152/jn.00636.2018.
- 1719 Alex Sheremet, Yu Qin, Jack P Kennedy, Yuchen Zhou, and Andrew P Maurer. Wave turbulence  
1720 and energy cascade in the hippocampus. *Frontiers in Systems Neuroscience*, 12:62, 2019b.  
1721 ISSN 1662-5137. doi: doi: 10.3389/fnsys.2018.00062.
- 1722 Alexandru Sheremet, Yu Qin, Jack P Kennedy, and Andrew Maurer. Mesoscale turbulence in  
1723 the hippocampus. *bioRxiv*, page 217877, 2017.
- 1724 Woodrow L Shew, Hongdian Yang, Shan Yu, Rajarshi Roy, and Dietmar Plenz. Information  
1725 capacity and transmission are maximized in balanced cortical networks with neuronal  
1726 avalanches. *Journal of neuroscience*, 31(1):55–63, 2011.
- 1727 E. Stark, R. Eichler, L. Roux, S. Fujisawa, H. G. Rotstein, and G. Buzsáki. Inhibition-induced  
1728 theta resonance in cortical circuits. *Neuron*, 80(5):1263–76, 2013. ISSN 1097-4199. doi:  
1729 10.1016/j.neuron.2013.09.033. URL <http://www.ncbi.nlm.nih.gov/pubmed/24314731>.
- 1730 V.K. Stefanescu, R.A. & Jirsa. Reduced representations of heterogeneous mixed neural net-  
1731 works with synaptic coupling. *Phys. Rev. E*, 83, 2011.
- 1732 S. H. Strogatz. From Kuramoto to Crawford: exploring the onset of synchronization in popu-  
1733 lations of coupled oscillators. *Physica D*, 143:1–20, 2000.
- 1734 D. Sussillo and L.F. Abbott. Generating coherent patterns of activity from chaotic neural net-  
1735 works. *Neuron*, 63:544–557, 2009.
- 1736 Edward Chace Tolman. The determiners of behavior at a choice point. *Psychological Review*,  
1737 45(1):1, 1938. ISSN 1939-1471.

- 1738 David Tong. *Kinetic Theory*. Course Notes, Published online. 2012. URL  
1739 <https://www.damtp.cam.ac.uk/user/tong/kinetic.html>.
- 1740 R. D. Traub, N. Spruston, I. Soltesz, A. Kenneth, M. A. Whittington, and J. G. R. Jeffreys. Gamma-  
1741 frequency oscillations: a neuronal population phenomenon, regulated by synaptic and in-  
1742 trinsic cellular processes, and inducing synaptic plasticity. *Progress in Neurobiology*, 55:  
1743 563–575, 1998.
- 1744 A.J. Trevelyan, D. Sussillo, and R. Yuste. Feedforward inhibition contributes to the control of  
1745 epileptiform propagation speed. *Journal of Neuroscience*, 2:3383–3387, 2007.
- 1746 WC Troy. Wave phenomena in neuronal networks. *Dissipative Solitons: From Optics to Biology*  
1747 *and Medicine*, pages 1–22, 2008.
- 1748 C.H. Vanderwolf. Hippocampal electrical activity and voluntary movement in the rat. *Elec-*  
1749 *troencephalography and Clinical Neurophysiology*, 26:407–418, 1969.
- 1750 X. J. Wang. Neurophysiological and computational principles of cortical rhythms in cognition.  
1751 *Physiol Rev*, 90(3):1195–268, 2010. ISSN 1522-1210. doi: 10.1152/physrev.00035.2008.  
1752 URL <http://www.ncbi.nlm.nih.gov/pubmed/20664082>.
- 1753 J. A. White, C. C. Chow, J. Rit, C. Soto-Treviño, and N. Kopell. Synchronization and oscillatory  
1754 dynamics in heterogeneous, mutually inhibited neurons. *Journal of Computational Neuro-*  
1755 *science*, 5:5–16, 1998.
- 1756 Gerald Beresford Whitham. *Linear and nonlinear waves*, volume 42. John Wiley & Sons, 2011.  
1757 ISBN 1118031202.
- 1758 M. A. Whittington, R. D. Traub, N. Kopell, B. Ermentrout, and E. H. Buhl. Inhibition-  
1759 based rhythms: experimental and mathematical observations on network dy-  
1760 namics. *Int J Psychophysiol*, 38(3):315–36, 2000. ISSN 0167-8760. URL  
1761 <http://www.ncbi.nlm.nih.gov/pubmed/11102670>.
- 1762 H. R. Wilson and J. D. Cowan. Excitatory and inhibitory interactions in localized populations  
1763 of model neurons. *Biophys J*, 12(1):1–24, 1972a. ISSN 0006-3495. doi: 10.1016/S0006-  
1764 3495(72)86068-5. URL <https://www.ncbi.nlm.nih.gov/pubmed/4332108>.
- 1765 H. R. Wilson and J. D. Cowan. Excitatory and inhibitory interactions in localized populations  
1766 of model neurons. *Biophysics Journal*, 12:1–24, 1972b.
- 1767 H. R. Wilson and J. D. Cowan. A mathematical theory of the functional dynamics of cortical  
1768 and thalamic nervous tissue. *Kybernetik*, 13:55–80, 1973.
- 1769 A.T. Winfree. *The geometry of biological time*. Springer Science and Business Media, 2001.
- 1770 X.-J. Wong, K.-F. & Wang. A recurrent network mechanism of time integration in perceptual  
1771 decisions. *J. Neurosci.*, 26:1314–1328, 2006.
- 1772 Mark W Woolrich and Klaas E Stephan. Biophysical network models and the human connec-  
1773 tome. *Neuroimage*, 80:330–338, 2013.
- 1774 J. J. Wright and D. T. Liley. Simulation of electrocortical waves. *Biol Cybern*, 72(4):347–56,  
1775 1995a. ISSN 0340-1200. URL <https://www.ncbi.nlm.nih.gov/pubmed/7748961>.
- 1776 J. J. Wright and D. T. J. Liley. Simulation of electrocortical waves. *Biological Cybernetics*, 72(4):  
1777 347–356, 1995b.
- 1778 JJ Wright and DTJ Liley. Dynamics of the brain at global and microscopic scales: Neural net-  
1779 works and the eeg. *Behavioral and Brain Sciences*, 19(2):285–295, 1996.
- 1780 JJ Wright, AA Sergejew, and DTJ Liley. Computer simulation of electrocortical activity at mil-  
1781 limetric scale. *Electroencephalography and clinical Neurophysiology*, 90(5):365–375, 1994.
- 1782 J. Y. Wu, Xiaoying Huang, and Chuan Zhang. Propagating waves of activity in the neocortex:  
1783 what they are, what they do. *Neuroscientist*, 14(5):487–502, 2008. ISSN 1073-8584. doi:

- 1784 10.1177/1073858408317066. URL <http://www.ncbi.nlm.nih.gov/pubmed/18997124>.  
1785 Peer Wulff, Alexey A Ponomarenko, Marlene Bartos, Tatiana M Korotkova, Elke C Fuchs, Flo-  
1786 rian Böhner, Martin Both, Adriano BL Tort, Nancy J Kopell, William Wisden, et al. Hip-  
1787 pocampal theta rhythm and its coupling with gamma oscillations require fast inhibition  
1788 onto parvalbumin-positive interneurons. *Proceedings of the National Academy of Sciences*,  
1789 106(9):3561–3566, 2009.
- 1790 Z. Xiao, P. Y. Deng, C. Yang, and S. Lei. Modulation of gabaergic transmission  
1791 by muscarinic receptors in the entorhinal cortex of juvenile rats. *J Neurophys-*  
1792 *iol*, 102(2):659–69, 2009. ISSN 0022-3077. doi: 10.1152/jn.00226.2009. URL  
1793 <http://www.ncbi.nlm.nih.gov/pubmed/19494196>.
- 1794 T. Xu, X. Yu, A. J. Perlik, W. F. Tobin, J. A. Zweig, K. Tennant, T. Jones, and Y. Zuo. Rapid  
1795 formation and selective stabilization of synapses for enduring motor memories. *Na-*  
1796 *ture*, 462(7275):915–9, 2009. ISSN 1476-4687. doi: 10.1038/nature08389. URL  
1797 <https://www.ncbi.nlm.nih.gov/pubmed/19946267>.
- 1798 V.E. Zakharov. Statistical theory of gravity and capillary waves on the surface of a finite-depth  
1799 fluid. *European Journal of Mechanics, B/Fluids*, 18(3):327–344, 1999.
- 1800 V.E. Zakharov, V.S. L’vov, and G. Falkovich. *Kolmogorov spectra of turbulence I*. Springer Series  
1801 in Nonlinear Dynamics. Springer-Verlag, 1992a.
- 1802 V.E. Zakharov, V.S. L’Vov, and G. Falkovich. Kolmogorov spectra of turbulence 1. wave tur-  
1803 bulence. *Kolmogorov spectra of turbulence 1. Wave turbulence.*, by Zakharov, VE; L’vov, VS;  
1804 Falkovich, G.. Springer, Berlin (Germany), 1992, 275 p., ISBN 3-540-54533-6, 1, 1992b.
- 1805 Y. Zhou, A. Sheremet, Y. Qin, J. P. Kennedy, N. M. DiCola, S. N. Burke, and A. P. Maurer. Method-  
1806 ological considerations on the use of different spectral decomposition algorithms to study  
1807 hippocampal rhythms. *eNeuro*, 6(4), 2019. ISSN 2373-2822. doi: 10.1523/ENEURO.0142-  
1808 19.2019. URL <https://www.ncbi.nlm.nih.gov/pubmed/31324673>.
